# Supplementary material for: GOTA: GO term annotation of biomedical literature
Source: PubMed Central journal article supplement (PMC4625458; doi:10.1186/s12859-015-0777-8), 2015-10-28
Supplement: 12859_2015_777_MOESM2_ESM.pdf [file 12859_2015_777_MOESM2_ESM.pdf]

# SUPPLEMENTARY MATERIALS

## GOTA: GO Term Annotation of biomedical literature

*Pietro Di Lena, Giacomo Domeniconi, Luciano Margara, Gianluca Moro*

### 1 Dataset statistics

We randomly divided the entire benchmark corpora, which contains a total of 115,402 publications, in two disjoint sets: a training set of 100,402 documents, which we call knowledge base (KB), and a test set of 15,000 documents. In the following, we compare the distributions of GO terms and references in the three sets: full benchmark set (All), training set (KB) and test set (Test).

The top section of Table 1 shows the percentage of publications that have at least one gold-standard annotation in each one of the three sub-ontologies BP, MF and CC. The bottom section of Table 1 shows the percentage of publications in the three sub-ontologies for which bibliography information is available. As can be seen in Table 1, the three sets are extremely well balanced. Figure 1 and 2 show the distribution and cumulative distribution, respectively, of gold-standard annotations on the entire benchmark set. As can be seen, from Figure 1 and 2, 39% of publications have a single annotations and 99% at most ten distinct annotations.

Tab. 1: Benchmark set statistics

| Dataset (#Docs) | %Docs with BP annot.  | %Docs with MF annot.  | %Docs with CC annot.  |
|-----------------|-----------------------|-----------------------|-----------------------|
| All (115,402)   | 74.98%                | 46.54%                | 35.11%                |
| KB (100,402)    | 74.98%                | 46.50%                | 35.18%                |
| Test (15,000)   | 74.95%                | 46.79%                | 34.68%                |
| Dataset (#Docs) | %Docs with bibl. (BP) | %Docs with bibl. (MF) | %Docs with bibl. (CC) |
| All (115,402)   | 40.27%                | 39.67%                | 40.86%                |
| KB (100,402)    | 40.28%                | 39.64%                | 40.85%                |
| Test (15,000)   | 40.21%                | 39.88%                | 40.91%                |

As a further analysis, for each GO term, we computed the difference of the relative frequency of the annotated publications belonging to KB and test set as follows:

$$\text{diff}(t) = \left| \frac{|p \in KB : p \text{ has annotation } t|}{|KB|} - \frac{|p \in Test : p \text{ has annotation } t|}{|Test|} \right|$$

Averaging the  $\text{diff}(t)$  for each  $t \in GO$ , the obtained value  $AVG_{t \in GO} \text{diff}(t) = 0.005\%$  indicates that the distributions of GO annotations are not very different for the publications in the KB in comparison to those in the test set. We also have an amount of 12,184 GO terms that are represented in the KB and not in the test set. The average number of publications associated to such GO terms is 2.84, which implies that these are very specific terms.

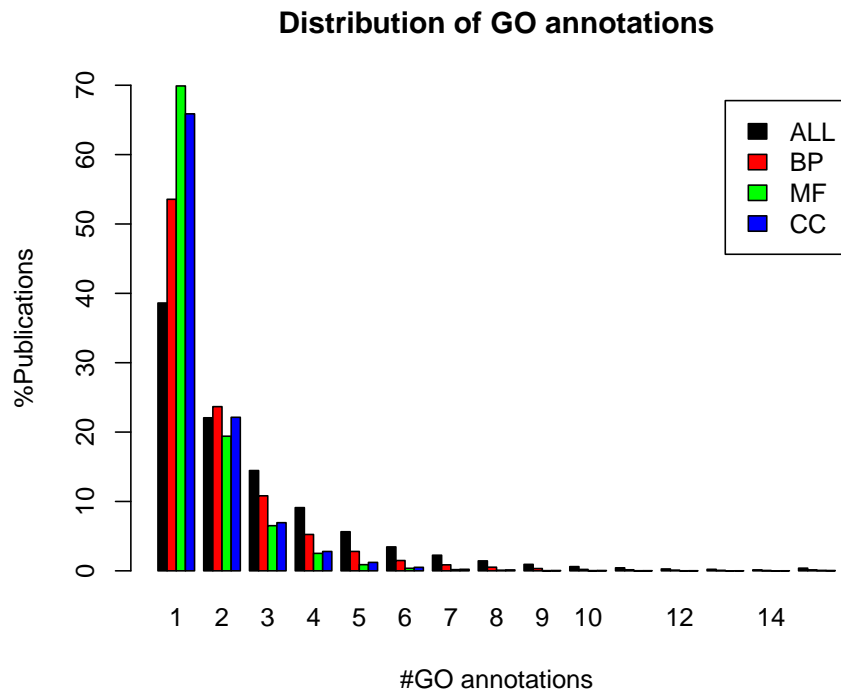

Fig. 1: Distribution of GO annotations over the entire benchmark set

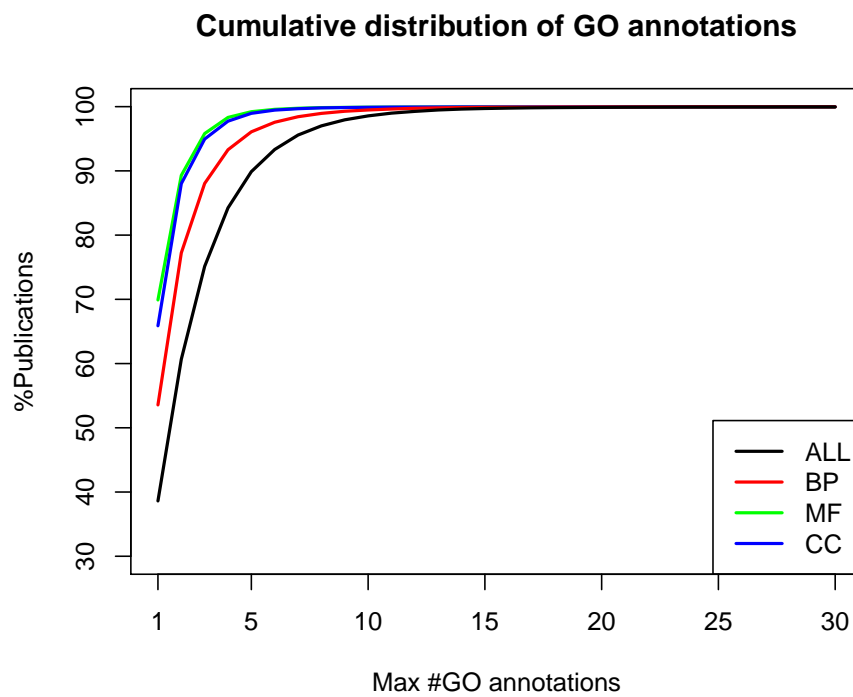

Fig. 2: Cumulative distribution of GO annotations over the entire benchmark set

## 2 Detailed evaluation results over the three distinct ontologies

We show the detailed classification performances over the entire GO hierarchy and separately over its three main categories Biological Process (BP), Molecular Function (MF) and Cellular Component (CC).

For each category, only the test-publications associated with at least one term in the selected category are considered for performance evaluation (the total number of considered publications is specified for each table). The performances have been assessed for both the top-10 and top-20 predicted terms. For instance, for the evaluation over the BP ontology, exactly the top- $k$  (where,  $k = 10$  or  $k = 20$ ) terms of type BP are taken into account. The same holds for the other two categories. In Section 2.3, in order to allow a fair comparison with GOCat over BP, MF and CC, a slightly different evaluation approach has been taken. The web-based GOCat application returns only the top-50 predicted terms; in most of the cases, among the top-50 terms we can observe less than  $k = 10$  (or 20) terms of type BP, MF and CC. For this reason, in Section 2.3, for all the considered approaches, we evaluate at most  $k = 10$  (or 20) BP, MF and CC terms (possibly none) among the top-50 returned by the classifiers. For completeness and correctness of information, we point out that, with respect to the  $MRR_{20}$  metric and over the three distinct ontologies BP, MF and CC, the shown performances of GOCat are not consistent with what reported in (Gobeill *et. al*, Database 2013). In particular, on our test set, we report for GOCat a lower value of  $MMR_{20}$  over the full GO and higher values over BP, MF and CC taxonomies.

The evaluation metrics adopted for performance assessment are defined in the "Evaluation metric" Section of the reference paper. We show here also the  $iP_k$ ,  $hP_k$  and the (hierarchical harmonic mean)  $hF_k$  metrics. We further include a new evaluation score  $\#_k$ , which indicates the fraction of publications for which at least one gold-standard annotation has been correctly predicted among the top- $k$  terms returned by the classifier.

For each table and for each metric (excluding  $hF_{max}$  and  $hF_k$ , which are not averaged) we also show the p-value of the paired student's t-test between GOTA (PM) and the other methods.

### 2.1 Overall classification performances

#### 2.1.1 Evaluation of the top-10 predicted GO terms

Tab. 2: Performance comparison over all GO (15,000 publications)

| Method <sup>a</sup> | Info <sup>b</sup> | IT <sup>c</sup> |             |             | CAFA <sup>c</sup> |             | BC <sup>c</sup> |             |             | TREC <sup>c</sup> |             | $\#_{10}^d$ |
|---------------------|-------------------|-----------------|-------------|-------------|-------------------|-------------|-----------------|-------------|-------------|-------------------|-------------|-------------|
|                     |                   | $iP_1$          | $iR_{10}$   | $iP_{10}$   | $hF_{max}$        | $hF_{10}$   | $hR_{10}$       | $hP_{10}$   | $MRR_{10}$  | $R_{10}$          |             |             |
| GOTA                | PM                | <b>0.43</b>     | <b>0.64</b> | <b>0.28</b> | <b>0.43</b>       | <b>0.35</b> | <b>0.69</b>     | <b>0.23</b> | <b>0.40</b> | <b>0.46</b>       | <b>0.68</b> |             |
| GOTA                | T+A               | 0.42            | <b>0.64</b> | <b>0.28</b> | <b>0.43</b>       | 0.34        | 0.68            | <b>0.23</b> | 0.39        | 0.45              | 0.67        |             |
| GOTA                | T                 | 0.41            | 0.63        | 0.27        | 0.42              | 0.34        | 0.68            | <b>0.23</b> | 0.39        | 0.44              | 0.67        |             |
| RandFR              | N/A               | 0.20            | 0.33        | 0.15        | 0.20              | 0.15        | 0.33            | 0.10        | 0.18        | 0.15              | 0.28        |             |
| RandIC              | N/A               | 0.21            | 0.27        | 0.20        | 0.18              | 0.17        | 0.31            | 0.12        | 0.03        | 0.08              | 0.14        |             |
| GOTA $\Phi_P$       | PM                | 0.37            | <b>0.64</b> | 0.26        | 0.41              | 0.33        | 0.67            | 0.22        | 0.38        | 0.44              | 0.66        |             |
| GOTA $\Phi_P$       | T+A               | 0.35            | 0.62        | 0.25        | 0.40              | 0.33        | 0.66            | 0.22        | 0.36        | 0.41              | 0.63        |             |
| GOTA $\Phi_P$       | T                 | 0.35            | 0.62        | 0.25        | 0.40              | 0.33        | 0.66            | 0.22        | 0.36        | 0.41              | 0.63        |             |
| GOTA $\Phi_T$       | PM                | 0.28            | 0.41        | 0.22        | 0.30              | 0.26        | 0.49            | 0.18        | 0.16        | 0.17              | 0.32        |             |
| GOTA $\Phi_T$       | T+A               | 0.24            | 0.37        | 0.20        | 0.27              | 0.24        | 0.46            | 0.16        | 0.11        | 0.12              | 0.23        |             |
| GOTA $\Phi_T$       | T                 | 0.22            | 0.35        | 0.19        | 0.26              | 0.22        | 0.44            | 0.15        | 0.09        | 0.10              | 0.19        |             |

For each metric, the best result is highlighted in bold.

Tab. 3: Statistical significance (p-value) of the paired t-test between GOTA (PM) and the other methods over all GO (15,000 publications)

| Method <sup>a</sup> | Info <sup>b</sup> | $iP_1$    | $iR_{10}$ | $iP_{10}$ | $hR_{10}$ | $hP_{10}$ | $MRR_{10}$ | $R_{10}$  | $\#_{10}$ |
|---------------------|-------------------|-----------|-----------|-----------|-----------|-----------|------------|-----------|-----------|
| GOTA                | T+A               | 3.030e-09 | 0.0006598 | <2.2e-16  | 2.205e-13 | 0.00301   | 4.957e-14  | 1.150e-13 | 2.331e-09 |
| GOTA                | T                 | 5.849e-14 | 1.948e-10 | <2.2e-16  | <2.2e-16  | 3.144e-11 | <2.2e-16   | <2.2e-16  | <2.2e-16  |
| RandFR              | N/A               | <2.2e-16  | <2.2e-16  | <2.2e-16  | <2.2e-16  | <2.2e-16  | <2.2e-16   | <2.2e-16  | <2.2e-16  |
| RandIC              | N/A               | <2.2e-16  | <2.2e-16  | <2.2e-16  | <2.2e-16  | <2.2e-16  | <2.2e-16   | <2.2e-16  | <2.2e-16  |
| GOTA $\Phi_P$       | PM                | <2.2e-16  | 0.00386   | <2.2e-16  | <2.2e-16  | 2.221e-11 | <2.2e-16   | <2.2e-16  | <2.2e-16  |
| GOTA $\Phi_P$       | T+A               | <2.2e-16  | <2.2e-16  | <2.2e-16  | <2.2e-16  | <2.2e-16  | <2.2e-16   | <2.2e-16  | <2.2e-16  |
| GOTA $\Phi_P$       | T                 | <2.2e-16  | <2.2e-16  | <2.2e-16  | <2.2e-16  | <2.2e-16  | <2.2e-16   | <2.2e-16  | <2.2e-16  |
| GOTA $\Phi_T$       | PM                | <2.2e-16  | <2.2e-16  | <2.2e-16  | <2.2e-16  | <2.2e-16  | <2.2e-16   | <2.2e-16  | <2.2e-16  |
| GOTA $\Phi_T$       | T+A               | <2.2e-16  | <2.2e-16  | <2.2e-16  | <2.2e-16  | <2.2e-16  | <2.2e-16   | <2.2e-16  | <2.2e-16  |
| GOTA $\Phi_T$       | T                 | <2.2e-16  | <2.2e-16  | <2.2e-16  | <2.2e-16  | <2.2e-16  | <2.2e-16   | <2.2e-16  | <2.2e-16  |

Not significant p-values are highlighted in bold.

Tab. 4: Performance comparison over BP (11,242 publications)

| Method <sup>a</sup> | Info <sup>b</sup> | IT <sup>c</sup>        |                         |                         | CAFA <sup>c</sup>        |                         | BC <sup>c</sup>         |                         |                          | TREC <sup>c</sup>      |             | # <sub>10</sub> <sup>d</sup> |
|---------------------|-------------------|------------------------|-------------------------|-------------------------|--------------------------|-------------------------|-------------------------|-------------------------|--------------------------|------------------------|-------------|------------------------------|
|                     |                   | <i>iP</i> <sub>1</sub> | <i>iR</i> <sub>10</sub> | <i>iP</i> <sub>10</sub> | <i>hF</i> <sub>max</sub> | <i>hF</i> <sub>10</sub> | <i>hR</i> <sub>10</sub> | <i>hP</i> <sub>10</sub> | <i>MRR</i> <sub>10</sub> | <i>R</i> <sub>10</sub> |             |                              |
| GOTA                | PM                | <b>0.50</b>            | <b>0.72</b>             | <b>0.34</b>             | <b>0.50</b>              | <b>0.34</b>             | <b>0.76</b>             | <b>0.22</b>             | <b>0.38</b>              | <b>0.49</b>            | <b>0.64</b> |                              |
| GOTA                | T+A               | 0.49                   | 0.71                    | <b>0.34</b>             | 0.49                     | <b>0.34</b>             | 0.75                    | <b>0.22</b>             | 0.36                     | 0.47                   | 0.62        |                              |
| GOTA                | T                 | 0.49                   | 0.70                    | <b>0.34</b>             | 0.49                     | <b>0.34</b>             | 0.75                    | <b>0.22</b>             | 0.36                     | 0.47                   | 0.62        |                              |
| RandFR              | N/A               | 0.21                   | 0.35                    | 0.20                    | 0.17                     | 0.16                    | 0.35                    | 0.10                    | 0.04                     | 0.06                   | 0.10        |                              |
| RandIC              | N/A               | 0.29                   | 0.32                    | 0.26                    | 0.26                     | 0.20                    | 0.36                    | 0.14                    | 0.01                     | 0.01                   | 0.02        |                              |
| GOTA $\Phi_P$       | PM                | 0.48                   | 0.71                    | 0.33                    | 0.48                     | 0.33                    | 0.75                    | 0.21                    | 0.36                     | 0.46                   | 0.61        |                              |
| GOTA $\Phi_P$       | T+A               | 0.47                   | 0.69                    | 0.33                    | 0.47                     | 0.33                    | 0.73                    | 0.21                    | 0.33                     | 0.44                   | 0.59        |                              |
| GOTA $\Phi_P$       | T                 | 0.47                   | 0.69                    | 0.33                    | 0.47                     | 0.33                    | 0.74                    | 0.21                    | 0.33                     | 0.44                   | 0.59        |                              |
| GOTA $\Phi_T$       | PM                | 0.33                   | 0.52                    | 0.26                    | 0.37                     | 0.29                    | 0.60                    | 0.19                    | 0.15                     | 0.21                   | 0.31        |                              |
| GOTA $\Phi_T$       | T+A               | 0.29                   | 0.48                    | 0.24                    | 0.34                     | 0.26                    | 0.57                    | 0.17                    | 0.11                     | 0.15                   | 0.23        |                              |
| GOTA $\Phi_T$       | T                 | 0.27                   | 0.46                    | 0.24                    | 0.32                     | 0.25                    | 0.55                    | 0.16                    | 0.09                     | 0.13                   | 0.19        |                              |

For each metric, the best result is highlighted in bold.

Tab. 5: Statistical significance (p-value) of the paired t-test between GOTA (PM) and the other methods over BP (11,242 publications)

| Method <sup>a</sup> | Info <sup>b</sup> | <i>iP</i> <sub>1</sub> | <i>iR</i> <sub>10</sub> | <i>iP</i> <sub>10</sub> | <i>hR</i> <sub>10</sub> | <i>hP</i> <sub>10</sub> | <i>MRR</i> <sub>10</sub> | <i>R</i> <sub>10</sub> | # <sub>10</sub> |
|---------------------|-------------------|------------------------|-------------------------|-------------------------|-------------------------|-------------------------|--------------------------|------------------------|-----------------|
| GOTA                | T+A               | 8.228e-09              | 1.786e-10               | <b>0.05258</b>          | 4.567e-12               | 2.485e-07               | <2.2e-16                 | <2.2e-16               | 1.158e-13       |
| GOTA                | T                 | 6.619e-13              | <2.2e-16                | 6.491e-08               | <2.2e-16                | <2.2e-16                | <2.2e-16                 | <2.2e-16               | <2.2e-16        |
| RandFR              | N/A               | <2.2e-16               | <2.2e-16                | <2.2e-16                | <2.2e-16                | <2.2e-16                | <2.2e-16                 | <2.2e-16               | <2.2e-16        |
| RandIC              | N/A               | <2.2e-16               | <2.2e-16                | <2.2e-16                | <2.2e-16                | <2.2e-16                | <2.2e-16                 | <2.2e-16               | <2.2e-16        |
| GOTA $\Phi_P$       | PM                | 4.623e-11              | 4.161e-07               | <2.2e-16                | <2.2e-16                | <2.2e-16                | <2.2e-16                 | <2.2e-16               | <2.2e-16        |
| GOTA $\Phi_P$       | T+A               | <2.2e-16               | <2.2e-16                | <2.2e-16                | <2.2e-16                | <2.2e-16                | <2.2e-16                 | <2.2e-16               | <2.2e-16        |
| GOTA $\Phi_P$       | T                 | <2.2e-16               | <2.2e-16                | <2.2e-16                | <2.2e-16                | <2.2e-16                | <2.2e-16                 | <2.2e-16               | <2.2e-16        |
| GOTA $\Phi_T$       | PM                | <2.2e-16               | <2.2e-16                | <2.2e-16                | <2.2e-16                | <2.2e-16                | <2.2e-16                 | <2.2e-16               | <2.2e-16        |
| GOTA $\Phi_T$       | T+A               | <2.2e-16               | <2.2e-16                | <2.2e-16                | <2.2e-16                | <2.2e-16                | <2.2e-16                 | <2.2e-16               | <2.2e-16        |
| GOTA $\Phi_T$       | T                 | <2.2e-16               | <2.2e-16                | <2.2e-16                | <2.2e-16                | <2.2e-16                | <2.2e-16                 | <2.2e-16               | <2.2e-16        |

Not significant p-values are highlighted in bold.

Tab. 6: Performance comparison over MF (7,019 publications)

| Method <sup>a</sup> | Info <sup>b</sup> | IT <sup>c</sup>        |                         |                         | CAFA <sup>c</sup>        |                         | BC <sup>c</sup>         |                         |                          | TREC <sup>c</sup>      |             | # <sub>10</sub> <sup>d</sup> |
|---------------------|-------------------|------------------------|-------------------------|-------------------------|--------------------------|-------------------------|-------------------------|-------------------------|--------------------------|------------------------|-------------|------------------------------|
|                     |                   | <i>iP</i> <sub>1</sub> | <i>iR</i> <sub>10</sub> | <i>iP</i> <sub>10</sub> | <i>hF</i> <sub>max</sub> | <i>hF</i> <sub>10</sub> | <i>hR</i> <sub>10</sub> | <i>hP</i> <sub>10</sub> | <i>MRR</i> <sub>10</sub> | <i>R</i> <sub>10</sub> |             |                              |
| GOTA                | PM                | <b>0.60</b>            | <b>0.75</b>             | <b>0.35</b>             | <b>0.65</b>              | 0.33                    | <b>0.88</b>             | 0.20                    | <b>0.54</b>              | <b>0.71</b>            | <b>0.79</b> |                              |
| GOTA                | T+A               | 0.58                   | 0.74                    | <b>0.35</b>             | 0.64                     | 0.33                    | <b>0.88</b>             | 0.20                    | 0.52                     | 0.70                   | 0.78        |                              |
| GOTA                | T                 | 0.57                   | 0.74                    | <b>0.35</b>             | 0.64                     | 0.33                    | 0.87                    | 0.20                    | 0.52                     | 0.69                   | 0.77        |                              |
| RandFR              | N/A               | 0.43                   | 0.46                    | 0.27                    | 0.49                     | 0.17                    | 0.59                    | 0.10                    | 0.31                     | 0.32                   | 0.39        |                              |
| RandIC              | N/A               | 0.43                   | 0.45                    | 0.32                    | 0.49                     | <b>0.35</b>             | 0.50                    | <b>0.27</b>             | 0.28                     | 0.26                   | 0.32        |                              |
| GOTA $\Phi_P$       | PM                | 0.55                   | <b>0.75</b>             | 0.34                    | <b>0.65</b>              | 0.31                    | <b>0.88</b>             | 0.19                    | 0.52                     | 0.69                   | 0.77        |                              |
| GOTA $\Phi_P$       | T+A               | 0.53                   | 0.74                    | 0.33                    | 0.62                     | 0.31                    | 0.86                    | 0.19                    | 0.49                     | 0.67                   | 0.75        |                              |
| GOTA $\Phi_P$       | T                 | 0.53                   | 0.74                    | 0.34                    | 0.63                     | 0.31                    | 0.87                    | 0.19                    | 0.49                     | 0.67                   | 0.75        |                              |
| GOTA $\Phi_T$       | PM                | 0.38                   | 0.56                    | 0.30                    | 0.49                     | 0.29                    | 0.75                    | 0.18                    | 0.18                     | 0.27                   | 0.33        |                              |
| GOTA $\Phi_T$       | T+A               | 0.34                   | 0.52                    | 0.28                    | 0.46                     | 0.28                    | 0.73                    | 0.17                    | 0.13                     | 0.21                   | 0.26        |                              |
| GOTA $\Phi_T$       | T                 | 0.33                   | 0.51                    | 0.28                    | 0.45                     | 0.27                    | 0.71                    | 0.17                    | 0.11                     | 0.20                   | 0.24        |                              |

For each metric, the best result is highlighted in bold.

Tab. 7: Statistical significance (p-value) of the paired t-test between GOTA (PM) and the other methods over MF (7,019 publications)

| Method <sup>a</sup> | Info <sup>b</sup> | <i>iP</i> <sub>1</sub> | <i>iR</i> <sub>10</sub> | <i>iP</i> <sub>10</sub> | <i>hR</i> <sub>10</sub> | <i>hP</i> <sub>10</sub> | <i>MRR</i> <sub>10</sub> | <i>R</i> <sub>10</sub> | # <sub>10</sub> |
|---------------------|-------------------|------------------------|-------------------------|-------------------------|-------------------------|-------------------------|--------------------------|------------------------|-----------------|
| GOTA                | T+A               | 1.399e-14              | 0.002341                | 1.898e-10               | 6.625e-06               | 2.053e-07               | 7.894e-13                | 3.545e-08              | 1.056e-06       |
| GOTA                | T                 | 1.051e-15              | 8.118e-06               | 8.268e-15               | 1.086e-09               | 1.601e-13               | 3.447e-14                | 1.395e-12              | 4.949e-10       |
| RandFR              | N/A               | <2.2e-16               | <2.2e-16                | <2.2e-16                | <2.2e-16                | <2.2e-16                | <2.2e-16                 | <2.2e-16               | <2.2e-16        |
| RandIC              | N/A               | <2.2e-16               | <2.2e-16                | <2.2e-16                | <2.2e-16                | <b>1</b>                | <2.2e-16                 | <2.2e-16               | <2.2e-16        |
| GOTA $\Phi_P$       | PM                | <2.2e-16               | <b>0.6325</b>           | <2.2e-16                | 5.347e-07               | <2.2e-16                | 4.347e-11                | 2.652e-11              | 2.18e-12        |
| GOTA $\Phi_P$       | T+A               | <2.2e-16               | 2.714e-05               | <2.2e-16                | <2.2e-16                | <2.2e-16                | <2.2e-16                 | <2.2e-16               | <2.2e-16        |
| GOTA $\Phi_P$       | T                 | <2.2e-16               | 5.719e-05               | <2.2e-16                | <2.2e-16                | <2.2e-16                | <2.2e-16                 | <2.2e-16               | <2.2e-16        |
| GOTA $\Phi_T$       | PM                | <2.2e-16               | <2.2e-16                | <2.2e-16                | <2.2e-16                | <2.2e-16                | <2.2e-16                 | <2.2e-16               | <2.2e-16        |
| GOTA $\Phi_T$       | T+A               | <2.2e-16               | <2.2e-16                | <2.2e-16                | <2.2e-16                | <2.2e-16                | <2.2e-16                 | <2.2e-16               | <2.2e-16        |
| GOTA $\Phi_T$       | T                 | <2.2e-16               | <2.2e-16                | <2.2e-16                | <2.2e-16                | <2.2e-16                | <2.2e-16                 | <2.2e-16               | <2.2e-16        |

Not significant p-values are highlighted in bold.

Tab. 8: Performance comparison over CC (5,202 publications)

| Method <sup>a</sup> | Info <sup>b</sup> | IT <sup>c</sup>        |                         |                         | CAFA <sup>c</sup>        |                         | BC <sup>c</sup>         |                         |                          | TREC <sup>c</sup>      |             | # <sup>d</sup> <sub>10</sub> |
|---------------------|-------------------|------------------------|-------------------------|-------------------------|--------------------------|-------------------------|-------------------------|-------------------------|--------------------------|------------------------|-------------|------------------------------|
|                     |                   | <i>iP</i> <sub>1</sub> | <i>iR</i> <sub>10</sub> | <i>iP</i> <sub>10</sub> | <i>hF</i> <sub>max</sub> | <i>hF</i> <sub>10</sub> | <i>hR</i> <sub>10</sub> | <i>hP</i> <sub>10</sub> | <i>MRR</i> <sub>10</sub> | <i>R</i> <sub>10</sub> |             |                              |
| GOTA                | PM                | <b>0.62</b>            | <b>0.86</b>             | 0.42                    | <b>0.64</b>              | 0.40                    | <b>0.90</b>             | 0.26                    | <b>0.52</b>              | <b>0.73</b>            | <b>0.81</b> |                              |
| GOTA                | T+A               | 0.61                   | 0.85                    | 0.42                    | <b>0.64</b>              | 0.39                    | <b>0.90</b>             | 0.25                    | 0.51                     | 0.71                   | 0.80        |                              |
| GOTA                | T                 | 0.61                   | 0.85                    | 0.42                    | 0.63                     | 0.39                    | <b>0.90</b>             | 0.25                    | 0.50                     | 0.71                   | 0.80        |                              |
| RandFR              | N/A               | 0.50                   | 0.68                    | 0.37                    | 0.52                     | 0.38                    | 0.71                    | 0.26                    | 0.30                     | 0.48                   | 0.56        |                              |
| RandIC              | N/A               | 0.50                   | 0.56                    | <b>0.46</b>             | 0.53                     | <b>0.50</b>             | 0.60                    | <b>0.43</b>             | 0.12                     | 0.23                   | 0.30        |                              |
| GOTA $\Phi_P$       | PM                | 0.61                   | <b>0.86</b>             | 0.42                    | <b>0.64</b>              | 0.40                    | <b>0.90</b>             | 0.26                    | 0.51                     | 0.72                   | 0.80        |                              |
| GOTA $\Phi_P$       | T+A               | 0.60                   | <b>0.86</b>             | 0.42                    | 0.62                     | 0.40                    | 0.89                    | 0.26                    | 0.50                     | 0.71                   | 0.79        |                              |
| GOTA $\Phi_P$       | T                 | 0.60                   | <b>0.86</b>             | 0.42                    | 0.62                     | 0.40                    | 0.89                    | 0.26                    | 0.50                     | 0.71                   | 0.79        |                              |
| GOTA $\Phi_T$       | PM                | 0.37                   | 0.49                    | 0.31                    | 0.46                     | 0.31                    | 0.66                    | 0.20                    | 0.15                     | 0.21                   | 0.27        |                              |
| GOTA $\Phi_T$       | T+A               | 0.35                   | 0.47                    | 0.29                    | 0.45                     | 0.30                    | 0.64                    | 0.20                    | 0.12                     | 0.18                   | 0.23        |                              |
| GOTA $\Phi_T$       | T                 | 0.33                   | 0.44                    | 0.28                    | 0.44                     | 0.30                    | 0.62                    | 0.20                    | 0.09                     | 0.14                   | 0.19        |                              |

For each metric, the best result is highlighted in bold.

Tab. 9: Statistical significance (p-value) of the paired t-test between GOTA (PM) and the other methods over CC (5,202 publications)

| Method <sup>a</sup> | Info <sup>b</sup> | <i>iP</i> <sub>1</sub> | <i>iR</i> <sub>10</sub> | <i>iP</i> <sub>10</sub> | <i>hR</i> <sub>10</sub> | <i>hP</i> <sub>10</sub> | <i>MRR</i> <sub>10</sub> | <i>R</i> <sub>10</sub> | # <sub>10</sub> |
|---------------------|-------------------|------------------------|-------------------------|-------------------------|-------------------------|-------------------------|--------------------------|------------------------|-----------------|
| GOTA                | T+A               | 0.02054                | 2.198e-06               | 9.493e-10               | 4.805e-05               | 0.0003024               | 8.635e-05                | 1.233e-06              | 1.892e-06       |
| GOTA                | T                 | 0.0002178              | 2.339e-09               | 1.881e-14               | 3.897e-08               | 9.646e-10               | 2.325e-08                | 2.904e-09              | 1.531e-08       |
| RandFR              | N/A               | <2.2e-16               | <2.2e-16                | <2.2e-16                | <2.2e-16                | <b>0.9997</b>           | <2.2e-16                 | <2.2e-16               | <2.2e-16        |
| RandIC              | N/A               | <2.2e-16               | <2.2e-16                | <b>1</b>                | <2.2e-16                | <b>1</b>                | <2.2e-16                 | <2.2e-16               | <2.2e-16        |
| GOTA $\Phi_P$       | PM                | <b>0.07303</b>         | <b>0.4768</b>           | 0.0006042               | 0.0004766               | <b>0.9999</b>           | <b>0.05582</b>           | 0.0003123              | 8.63e-05        |
| GOTA $\Phi_P$       | T+A               | 9.323e-07              | 0.004878                | 6.046e-07               | 2.252e-08               | <b>0.772</b>            | 3.452e-10                | 1.839e-09              | 5.675e-09       |
| GOTA $\Phi_P$       | T                 | 1.543e-06              | 0.003809                | 4.949e-07               | 1.673e-08               | <b>0.7736</b>           | 8.228e-10                | 3.562e-09              | 1.091e-08       |
| GOTA $\Phi_T$       | PM                | <2.2e-16               | <2.2e-16                | <2.2e-16                | <2.2e-16                | <2.2e-16                | <2.2e-16                 | <2.2e-16               | <2.2e-16        |
| GOTA $\Phi_T$       | T+A               | <2.2e-16               | <2.2e-16                | <2.2e-16                | <2.2e-16                | <2.2e-16                | <2.2e-16                 | <2.2e-16               | <2.2e-16        |
| GOTA $\Phi_T$       | T                 | <2.2e-16               | <2.2e-16                | <2.2e-16                | <2.2e-16                | <2.2e-16                | <2.2e-16                 | <2.2e-16               | <2.2e-16        |

Not significant p-values are highlighted in bold.

<sup>a</sup> Method used for prediction. RandFR and RandIC are baseline predictors.

<sup>b</sup> Informations used in prediction: PM = title, abstract, references and publication year (PubMed); T+A = title and abstract; T = title; N/A = no information.

<sup>c</sup> Metrics definitions are in Section 2.3.

<sup>d</sup> Fraction of publications for which at least one gold-standard annotation has been correctly predicted.

### 2.1.2 Evaluation of the top-20 predicted GO terms

Tab. 10: Performance comparison over all GO (15,000 publications)

| Method <sup>a</sup> | Info <sup>b</sup> | IT <sup>c</sup>        |                         |                         | CAFA <sup>c</sup>        |                         | BC <sup>c</sup>         |                         |                          | TREC <sup>c</sup>      |             | # <sup>d</sup> <sub>20</sub> |
|---------------------|-------------------|------------------------|-------------------------|-------------------------|--------------------------|-------------------------|-------------------------|-------------------------|--------------------------|------------------------|-------------|------------------------------|
|                     |                   | <i>iP</i> <sub>1</sub> | <i>iR</i> <sub>20</sub> | <i>iP</i> <sub>20</sub> | <i>hF</i> <sub>max</sub> | <i>hF</i> <sub>20</sub> | <i>hR</i> <sub>20</sub> | <i>hP</i> <sub>20</sub> | <i>MRR</i> <sub>20</sub> | <i>R</i> <sub>20</sub> |             |                              |
| GOTA                | PM                | <b>0.43</b>            | <b>0.73</b>             | <b>0.24</b>             | <b>0.43</b>              | <b>0.27</b>             | <b>0.80</b>             | <b>0.16</b>             | <b>0.41</b>              | <b>0.56</b>            | <b>0.77</b> |                              |
| GOTA                | T+A               | 0.42                   | 0.72                    | <b>0.24</b>             | <b>0.43</b>              | <b>0.27</b>             | 0.79                    | <b>0.16</b>             | 0.40                     | 0.55                   | 0.76        |                              |
| GOTA                | T                 | 0.41                   | 0.72                    | <b>0.24</b>             | 0.42                     | <b>0.27</b>             | 0.78                    | <b>0.16</b>             | 0.39                     | 0.54                   | 0.75        |                              |
| RandFR              | N/A               | 0.20                   | 0.40                    | 0.14                    | 0.20                     | 0.15                    | 0.43                    | 0.09                    | 0.18                     | 0.19                   | 0.34        |                              |
| RandIC              | N/A               | 0.21                   | 0.31                    | 0.19                    | 0.18                     | 0.10                    | 0.38                    | 0.06                    | 0.03                     | 0.08                   | 0.15        |                              |
| GOTA $\Phi_P$       | PM                | 0.37                   | <b>0.73</b>             | 0.23                    | 0.41                     | <b>0.27</b>             | 0.78                    | <b>0.16</b>             | 0.39                     | 0.54                   | 0.75        |                              |
| GOTA $\Phi_P$       | T+A               | 0.35                   | 0.71                    | 0.22                    | 0.40                     | 0.25                    | 0.77                    | 0.15                    | 0.37                     | 0.52                   | 0.73        |                              |
| GOTA $\Phi_P$       | T                 | 0.35                   | 0.71                    | 0.22                    | 0.40                     | 0.25                    | 0.77                    | 0.15                    | 0.37                     | 0.52                   | 0.73        |                              |
| GOTA $\Phi_T$       | PM                | 0.28                   | 0.48                    | 0.20                    | 0.30                     | 0.21                    | 0.58                    | 0.13                    | 0.16                     | 0.22                   | 0.40        |                              |
| GOTA $\Phi_T$       | T+A               | 0.24                   | 0.45                    | 0.19                    | 0.27                     | 0.20                    | 0.56                    | 0.12                    | 0.11                     | 0.17                   | 0.30        |                              |
| GOTA $\Phi_T$       | T                 | 0.22                   | 0.42                    | 0.18                    | 0.26                     | 0.18                    | 0.54                    | 0.11                    | 0.09                     | 0.14                   | 0.27        |                              |

For each metric, the best result is highlighted in bold.

Tab. 11: Statistical significance (p-value) of the paired t-test between GOTA (PM) and the other methods over all GO (15,000 publications)

| Method <sup>a</sup> | Info <sup>b</sup> | <i>iP</i> <sub>1</sub> | <i>iR</i> <sub>20</sub> | <i>iP</i> <sub>20</sub> | <i>hR</i> <sub>20</sub> | <i>hP</i> <sub>20</sub> | <i>MRR</i> <sub>20</sub> | <i>R</i> <sub>20</sub> | # <sup>d</sup> <sub>20</sub> |
|---------------------|-------------------|------------------------|-------------------------|-------------------------|-------------------------|-------------------------|--------------------------|------------------------|------------------------------|
| GOTA                | T+A               | 3.030e-09              | 4.768e-08               | 6.664e-15               | 6.705e-14               | 0.000633                | 1.529e-14                | <2.2e-16               | 6.064e-14                    |
| GOTA                | T                 | 5.849e-14              | <2.2e-16                | <2.2e-16                | <2.2e-16                | 2.392e-13               | <2.2e-16                 | <2.2e-16               | <2.2e-16                     |
| RandFR              | N/A               | <2.2e-16               | <2.2e-16                | <2.2e-16                | <2.2e-16                | <2.2e-16                | <2.2e-16                 | <2.2e-16               | <2.2e-16                     |
| RandIC              | N/A               | <2.2e-16               | <2.2e-16                | <2.2e-16                | <2.2e-16                | <2.2e-16                | <2.2e-16                 | <2.2e-16               | <2.2e-16                     |
| GOTA $\Phi_P$       | PM                | <2.2e-16               | 0.002566                | <2.2e-16                | <2.2e-16                | <2.2e-16                | <2.2e-16                 | <2.2e-16               | <2.2e-16                     |
| GOTA $\Phi_P$       | T+A               | <2.2e-16               | <2.2e-16                | <2.2e-16                | <2.2e-16                | <2.2e-16                | <2.2e-16                 | <2.2e-16               | <2.2e-16                     |
| GOTA $\Phi_P$       | T                 | <2.2e-16               | <2.2e-16                | <2.2e-16                | <2.2e-16                | <2.2e-16                | <2.2e-16                 | <2.2e-16               | <2.2e-16                     |
| GOTA $\Phi_T$       | PM                | <2.2e-16               | <2.2e-16                | <2.2e-16                | <2.2e-16                | <2.2e-16                | <2.2e-16                 | <2.2e-16               | <2.2e-16                     |
| GOTA $\Phi_T$       | T+A               | <2.2e-16               | <2.2e-16                | <2.2e-16                | <2.2e-16                | <2.2e-16                | <2.2e-16                 | <2.2e-16               | <2.2e-16                     |
| GOTA $\Phi_T$       | T                 | <2.2e-16               | <2.2e-16                | <2.2e-16                | <2.2e-16                | <2.2e-16                | <2.2e-16                 | <2.2e-16               | <2.2e-16                     |

Not significant p-values are highlighted in bold.

Tab. 12: Performance comparison over BP (11,242 publications)

| Method <sup>a</sup> | Info <sup>b</sup> | IT <sup>c</sup>        |                         |                         | CAFA <sup>c</sup>        | BC <sup>c</sup>         |                         |                         | TREC <sup>c</sup>        |                        | # <sub>20</sub> <sup>d</sup> |
|---------------------|-------------------|------------------------|-------------------------|-------------------------|--------------------------|-------------------------|-------------------------|-------------------------|--------------------------|------------------------|------------------------------|
|                     |                   | <i>iP</i> <sub>1</sub> | <i>iR</i> <sub>20</sub> | <i>iP</i> <sub>20</sub> | <i>hF</i> <sub>max</sub> | <i>hF</i> <sub>20</sub> | <i>hR</i> <sub>20</sub> | <i>hP</i> <sub>20</sub> | <i>MRR</i> <sub>20</sub> | <i>R</i> <sub>20</sub> |                              |
| GOTA                | PM                | <b>0.50</b>            | <b>0.78</b>             | <b>0.30</b>             | <b>0.50</b>              | <b>0.24</b>             | <b>0.84</b>             | <b>0.14</b>             | <b>0.39</b>              | <b>0.58</b>            | <b>0.72</b>                  |
| GOTA                | T+A               | 0.49                   | <b>0.78</b>             | <b>0.30</b>             | 0.49                     | <b>0.24</b>             | 0.83                    | <b>0.14</b>             | 0.37                     | 0.56                   | 0.70                         |
| GOTA                | T                 | 0.49                   | 0.77                    | 0.29                    | 0.49                     | <b>0.24</b>             | 0.83                    | <b>0.14</b>             | 0.37                     | 0.56                   | 0.70                         |
| RandFR              | N/A               | 0.21                   | 0.43                    | 0.17                    | 0.17                     | 0.15                    | 0.48                    | 0.09                    | 0.04                     | 0.10                   | 0.15                         |
| RandIC              | N/A               | 0.29                   | 0.36                    | 0.25                    | 0.26                     | 0.12                    | 0.47                    | 0.07                    | 0.01                     | 0.02                   | 0.03                         |
| GOTA $\Phi_P$       | PM                | 0.48                   | <b>0.78</b>             | 0.28                    | 0.48                     | <b>0.24</b>             | 0.83                    | <b>0.14</b>             | 0.36                     | 0.55                   | 0.70                         |
| GOTA $\Phi_P$       | T+A               | 0.47                   | 0.77                    | 0.28                    | 0.47                     | <b>0.24</b>             | 0.82                    | <b>0.14</b>             | 0.34                     | 0.53                   | 0.67                         |
| GOTA $\Phi_P$       | T                 | 0.47                   | 0.77                    | 0.28                    | 0.47                     | <b>0.24</b>             | 0.82                    | <b>0.14</b>             | 0.34                     | 0.53                   | 0.67                         |
| GOTA $\Phi_T$       | PM                | 0.33                   | 0.59                    | 0.25                    | 0.37                     | 0.22                    | 0.68                    | 0.13                    | 0.16                     | 0.28                   | 0.39                         |
| GOTA $\Phi_T$       | T+A               | 0.29                   | 0.55                    | 0.23                    | 0.34                     | 0.22                    | 0.65                    | 0.13                    | 0.11                     | 0.21                   | 0.31                         |
| GOTA $\Phi_T$       | T                 | 0.27                   | 0.53                    | 0.22                    | 0.32                     | 0.20                    | 0.64                    | 0.12                    | 0.09                     | 0.18                   | 0.27                         |

For each metric, the best result is highlighted in bold.

Tab. 13: Statistical significance (p-value) of the paired t-test between GOTA (PM) and the other methods over BP (11,242 publications)

| Method <sup>a</sup> | Info <sup>b</sup> | <i>iP</i> <sub>1</sub> | <i>iR</i> <sub>20</sub> | <i>iP</i> <sub>20</sub> | <i>hR</i> <sub>20</sub> | <i>hP</i> <sub>20</sub> | <i>MRR</i> <sub>20</sub> | <i>R</i> <sub>20</sub> | # <sub>20</sub> <sup>d</sup> |
|---------------------|-------------------|------------------------|-------------------------|-------------------------|-------------------------|-------------------------|--------------------------|------------------------|------------------------------|
| GOTA                | T+A               | 8.228e-09              | 5.778e-08               | <b>0.8528</b>           | 6.887e-11               | 0.01363                 | <2.2e-16                 | <2.2e-16               | 1.039e-11                    |
| GOTA                | T                 | 6.619e-13              | <2.2e-16                | 0.0001168               | <2.2e-16                | 9.995e-12               | <2.2e-16                 | <2.2e-16               | <2.2e-16                     |
| RandFR              | N/A               | <2.2e-16               | <2.2e-16                | <2.2e-16                | <2.2e-16                | <2.2e-16                | <2.2e-16                 | <2.2e-16               | <2.2e-16                     |
| RandIC              | N/A               | <2.2e-16               | <2.2e-16                | <2.2e-16                | <2.2e-16                | <2.2e-16                | <2.2e-16                 | <2.2e-16               | <2.2e-16                     |
| GOTA $\Phi_P$       | PM                | 4.623e-11              | 0.0002218               | <2.2e-16                | <2.2e-16                | <2.2e-16                | <2.2e-16                 | <2.2e-16               | <2.2e-16                     |
| GOTA $\Phi_P$       | T+A               | <2.2e-16               | <2.2e-16                | <2.2e-16                | <2.2e-16                | <2.2e-16                | <2.2e-16                 | <2.2e-16               | <2.2e-16                     |
| GOTA $\Phi_P$       | T                 | <2.2e-16               | <2.2e-16                | <2.2e-16                | <2.2e-16                | <2.2e-16                | <2.2e-16                 | <2.2e-16               | <2.2e-16                     |
| GOTA $\Phi_T$       | PM                | <2.2e-16               | <2.2e-16                | <2.2e-16                | <2.2e-16                | <2.2e-16                | <2.2e-16                 | <2.2e-16               | <2.2e-16                     |
| GOTA $\Phi_T$       | T+A               | <2.2e-16               | <2.2e-16                | <2.2e-16                | <2.2e-16                | <2.2e-16                | <2.2e-16                 | <2.2e-16               | <2.2e-16                     |
| GOTA $\Phi_T$       | T                 | <2.2e-16               | <2.2e-16                | <2.2e-16                | <2.2e-16                | <2.2e-16                | <2.2e-16                 | <2.2e-16               | <2.2e-16                     |

Not significant p-values are highlighted in bold.

Tab. 14: Performance comparison over MF (7,019 publications)

| Method <sup>a</sup> | Info <sup>b</sup> | IT <sup>c</sup>        |                         |                         | CAFA <sup>c</sup>        | BC <sup>c</sup>         |                         |                         | TREC <sup>c</sup>        |                        | # <sub>20</sub> <sup>d</sup> |
|---------------------|-------------------|------------------------|-------------------------|-------------------------|--------------------------|-------------------------|-------------------------|-------------------------|--------------------------|------------------------|------------------------------|
|                     |                   | <i>iP</i> <sub>1</sub> | <i>iR</i> <sub>20</sub> | <i>iP</i> <sub>20</sub> | <i>hF</i> <sub>max</sub> | <i>hF</i> <sub>20</sub> | <i>hR</i> <sub>20</sub> | <i>hP</i> <sub>20</sub> | <i>MRR</i> <sub>20</sub> | <i>R</i> <sub>20</sub> |                              |
| GOTA                | PM                | <b>0.60</b>            | <b>0.78</b>             | <b>0.31</b>             | <b>0.65</b>              | 0.21                    | <b>0.92</b>             | 0.12                    | <b>0.54</b>              | <b>0.77</b>            | <b>0.84</b>                  |
| GOTA                | T+A               | 0.58                   | 0.77                    | 0.30                    | 0.64                     | 0.21                    | <b>0.92</b>             | 0.12                    | 0.53                     | 0.76                   | 0.83                         |
| GOTA                | T                 | 0.57                   | 0.77                    | 0.30                    | 0.64                     | 0.21                    | <b>0.92</b>             | 0.12                    | 0.53                     | 0.76                   | 0.82                         |
| RandFR              | N/A               | 0.43                   | 0.53                    | 0.26                    | 0.49                     | 0.13                    | 0.64                    | 0.07                    | 0.31                     | 0.38                   | 0.45                         |
| RandIC              | N/A               | 0.43                   | 0.50                    | 0.30                    | 0.49                     | <b>0.24</b>             | 0.56                    | <b>0.15</b>             | 0.29                     | 0.29                   | 0.36                         |
| GOTA $\Phi_P$       | PM                | 0.55                   | <b>0.78</b>             | 0.30                    | <b>0.65</b>              | 0.20                    | <b>0.92</b>             | 0.11                    | 0.52                     | 0.76                   | 0.83                         |
| GOTA $\Phi_P$       | T+A               | 0.53                   | <b>0.78</b>             | 0.29                    | 0.63                     | 0.20                    | 0.91                    | 0.11                    | 0.49                     | 0.75                   | 0.81                         |
| GOTA $\Phi_P$       | T                 | 0.53                   | <b>0.78</b>             | 0.29                    | 0.63                     | 0.20                    | 0.91                    | 0.11                    | 0.49                     | 0.75                   | 0.81                         |
| GOTA $\Phi_T$       | PM                | 0.38                   | 0.61                    | 0.28                    | 0.49                     | 0.21                    | 0.80                    | 0.12                    | 0.18                     | 0.33                   | 0.40                         |
| GOTA $\Phi_T$       | T+A               | 0.34                   | 0.58                    | 0.27                    | 0.46                     | 0.21                    | 0.78                    | 0.12                    | 0.13                     | 0.27                   | 0.33                         |
| GOTA $\Phi_T$       | T                 | 0.33                   | 0.56                    | 0.27                    | 0.45                     | 0.21                    | 0.77                    | 0.12                    | 0.12                     | 0.25                   | 0.31                         |

For each metric, the best result is highlighted in bold.

Tab. 15: Statistical significance (p-value) of the paired t-test between GOTA (PM) and the other methods over MF (7,019 publications)

| Method <sup>a</sup> | Info <sup>b</sup> | <i>iP</i> <sub>1</sub> | <i>iR</i> <sub>20</sub> | <i>iP</i> <sub>20</sub> | <i>hR</i> <sub>20</sub> | <i>hP</i> <sub>20</sub> | <i>MRR</i> <sub>20</sub> | <i>R</i> <sub>20</sub> | # <sub>20</sub> <sup>d</sup> |
|---------------------|-------------------|------------------------|-------------------------|-------------------------|-------------------------|-------------------------|--------------------------|------------------------|------------------------------|
| GOTA                | T+A               | 1.399e-14              | 0.0006626               | 1.103e-15               | 4.528e-05               | 3.163e-08               | 6.99e-13                 | 1.953e-08              | 5.146e-07                    |
| GOTA                | T                 | 1.051e-15              | 1.127e-05               | <2.2e-16                | 6.694e-08               | 8.245e-15               | 3.727e-14                | 4.83e-12               | 8.111e-10                    |
| RandFR              | N/A               | <2.2e-16               | <2.2e-16                | <2.2e-16                | <2.2e-16                | <2.2e-16                | <2.2e-16                 | <2.2e-16               | <2.2e-16                     |
| RandIC              | N/A               | <2.2e-16               | <2.2e-16                | 0.0004285               | <2.2e-16                | <b>1</b>                | <2.2e-16                 | <2.2e-16               | <2.2e-16                     |
| GOTA $\Phi_P$       | PM                | <2.2e-16               | <b>0.9657</b>           | <2.2e-16                | 4.858e-06               | <2.2e-16                | 9.48e-11                 | 3.091e-11              | 2.762e-09                    |
| GOTA $\Phi_P$       | T+A               | <2.2e-16               | 0.006705                | <2.2e-16                | 1.58e-15                | <2.2e-16                | <2.2e-16                 | <2.2e-16               | <2.2e-16                     |
| GOTA $\Phi_P$       | T                 | <2.2e-16               | 0.007871                | <2.2e-16                | 3.156e-15               | <2.2e-16                | <2.2e-16                 | <2.2e-16               | <2.2e-16                     |
| GOTA $\Phi_T$       | PM                | <2.2e-16               | <2.2e-16                | <2.2e-16                | <2.2e-16                | <b>0.7374</b>           | <2.2e-16                 | <2.2e-16               | <2.2e-16                     |
| GOTA $\Phi_T$       | T+A               | <2.2e-16               | <2.2e-16                | <2.2e-16                | <2.2e-16                | <b>0.0771</b>           | <2.2e-16                 | <2.2e-16               | <2.2e-16                     |
| GOTA $\Phi_T$       | T                 | <2.2e-16               | <2.2e-16                | <2.2e-16                | <2.2e-16                | 0.001684                | <2.2e-16                 | <2.2e-16               | <2.2e-16                     |

Not significant p-values are highlighted in bold.

Tab. 16: Performance comparison over CC (5,202 publications)

| Method <sup>a</sup> | Info <sup>b</sup> | IT <sup>c</sup>        |                         |                         | CAFA <sup>c</sup>        | BC <sup>c</sup>         |                         |                         | TREC <sup>c</sup>        |                        | # <sub>20</sub> <sup>d</sup> |
|---------------------|-------------------|------------------------|-------------------------|-------------------------|--------------------------|-------------------------|-------------------------|-------------------------|--------------------------|------------------------|------------------------------|
|                     |                   | <i>iP</i> <sub>1</sub> | <i>iR</i> <sub>20</sub> | <i>iP</i> <sub>20</sub> | <i>hF</i> <sub>max</sub> | <i>hF</i> <sub>20</sub> | <i>hR</i> <sub>20</sub> | <i>hP</i> <sub>20</sub> | <i>MRR</i> <sub>20</sub> | <i>R</i> <sub>20</sub> |                              |
| GOTA                | PM                | <b>0.62</b>            | <b>0.90</b>             | 0.38                    | <b>0.64</b>              | 0.27                    | <b>0.94</b>             | 0.16                    | <b>0.52</b>              | <b>0.81</b>            | <b>0.88</b>                  |
| GOTA                | T+A               | 0.61                   | 0.89                    | 0.37                    | <b>0.64</b>              | 0.27                    | <b>0.94</b>             | 0.16                    | <b>0.52</b>              | 0.80                   | 0.87                         |
| GOTA                | T                 | 0.61                   | 0.89                    | 0.37                    | 0.63                     | 0.27                    | <b>0.94</b>             | 0.16                    | 0.51                     | 0.80                   | 0.86                         |
| RandFR              | N/A               | 0.50                   | 0.77                    | 0.34                    | 0.52                     | 0.25                    | 0.80                    | 0.15                    | 0.31                     | 0.57                   | 0.65                         |
| RandIC              | N/A               | 0.50                   | 0.66                    | <b>0.41</b>             | 0.53                     | <b>0.32</b>             | 0.71                    | <b>0.21</b>             | 0.13                     | 0.38                   | 0.46                         |
| GOTA $\Phi_P$       | PM                | 0.61                   | <b>0.90</b>             | 0.37                    | <b>0.64</b>              | 0.27                    | <b>0.94</b>             | 0.16                    | <b>0.52</b>              | 0.80                   | 0.87                         |
| GOTA $\Phi_P$       | T+A               | 0.60                   | <b>0.90</b>             | 0.37                    | 0.62                     | 0.27                    | <b>0.94</b>             | 0.16                    | 0.50                     | 0.79                   | 0.86                         |
| GOTA $\Phi_P$       | T                 | 0.60                   | <b>0.90</b>             | 0.37                    | 0.62                     | 0.27                    | <b>0.94</b>             | 0.16                    | 0.50                     | 0.79                   | 0.86                         |
| GOTA $\Phi_T$       | PM                | 0.37                   | 0.53                    | 0.29                    | 0.46                     | 0.23                    | 0.71                    | 0.14                    | 0.16                     | 0.25                   | 0.32                         |
| GOTA $\Phi_T$       | T+A               | 0.35                   | 0.51                    | 0.28                    | 0.45                     | 0.23                    | 0.69                    | 0.14                    | 0.12                     | 0.23                   | 0.29                         |
| GOTA $\Phi_T$       | T                 | 0.33                   | 0.48                    | 0.27                    | 0.44                     | 0.23                    | 0.67                    | 0.14                    | 0.10                     | 0.18                   | 0.24                         |

For each metric, the best result is highlighted in bold.

Tab. 17: Statistical significance (p-value) of the paired t-test between GOTA (PM) and the other methods over CC (5,202 publications)

| Method <sup>a</sup> | Info <sup>b</sup> | <i>iP</i> <sub>1</sub> | <i>iR</i> <sub>20</sub> | <i>iP</i> <sub>20</sub> | <i>hR</i> <sub>20</sub> | <i>hP</i> <sub>20</sub> | <i>MRR</i> <sub>20</sub> | <i>R</i> <sub>20</sub> | # <sub>20</sub> <sup>d</sup> |
|---------------------|-------------------|------------------------|-------------------------|-------------------------|-------------------------|-------------------------|--------------------------|------------------------|------------------------------|
| GOTA                | T+A               | 0.02054                | 1.064e-06               | 6.61e-15                | 3.274e-05               | 6.687e-06               | 0.0001070                | 3.488e-09              | 3.918e-06                    |
| GOTA                | T                 | 0.0002178              | 6.3e-08                 | <2.2e-16                | 2.983e-06               | 3.865e-12               | 3.626e-08                | 1.896e-10              | 7.461e-07                    |
| RandFR              | N/A               | <2.2e-16               | <2.2e-16                | <2.2e-16                | <2.2e-16                | <2.2e-16                | <2.2e-16                 | <2.2e-16               | <2.2e-16                     |
| RandIC              | N/A               | <2.2e-16               | <2.2e-16                | <b>1</b>                | <2.2e-16                | <b>1</b>                | <2.2e-16                 | <2.2e-16               | <2.2e-16                     |
| GOTA $\Phi_P$       | PM                | <b>0.07303</b>         | <b>0.3083</b>           | 5.809e-11               | 0.0001568               | 0.007144                | <b>0.06104</b>           | 3.689e-07              | 1.864e-05                    |
| GOTA $\Phi_P$       | T+A               | 9.323e-07              | 0.0004821               | 2.736e-15               | 1.051e-08               | 0.003394                | 4.633e-10                | 4.253e-13              | 1.053e-08                    |
| GOTA $\Phi_P$       | T                 | 1.543e-06              | 0.0007846               | 9.242e-15               | 5.228e-08               | 0.005091                | 1.141e-09                | 3.690e-12              | 4.386e-08                    |
| GOTA $\Phi_T$       | PM                | <2.2e-16               | <2.2e-16                | <2.2e-16                | <2.2e-16                | <2.2e-16                | <2.2e-16                 | <2.2e-16               | <2.2e-16                     |
| GOTA $\Phi_T$       | T+A               | <2.2e-16               | <2.2e-16                | <2.2e-16                | <2.2e-16                | <2.2e-16                | <2.2e-16                 | <2.2e-16               | <2.2e-16                     |
| GOTA $\Phi_T$       | T                 | <2.2e-16               | <2.2e-16                | <2.2e-16                | <2.2e-16                | <2.2e-16                | <2.2e-16                 | <2.2e-16               | <2.2e-16                     |

Not significant p-values are highlighted in bold.

<sup>a</sup> Method used for prediction. RandFR and RandIC are baseline predictors.

<sup>b</sup> Informations used in prediction: PM = title, abstract, references and publication year (PubMed); T+A = title and abstract; T = title; N/A = no information.

<sup>c</sup> Metrics definitions are in Section 2.3.

<sup>d</sup> Fraction of publications for which at least one gold-standard annotation has been correctly predicted.

## 2.2 Performances on species-specific knowledge bases

### 2.2.1 Evaluation of the top-10 predicted GO terms

Tab. 18: Performance comparison over all GO

| Species <sup>a</sup> | KB <sup>b</sup> | Info <sup>c</sup> | IT <sup>d</sup> |             |             | CAFA <sup>d</sup> | BC <sup>d</sup> |             |             | TREC <sup>d</sup> |             | # <sup>e</sup> |
|----------------------|-----------------|-------------------|-----------------|-------------|-------------|-------------------|-----------------|-------------|-------------|-------------------|-------------|----------------|
|                      |                 |                   | $iP_1$          | $iR_{10}$   | $iP_{10}$   | $hF_{max}$        | $hF_{10}$       | $hR_{10}$   | $hP_{10}$   | $MRR_{10}$        | $R_{10}$    |                |
| Human                | Human           | PM                | <b>0.45</b>     | <b>0.62</b> | 0.28        | <b>0.46</b>       | <b>0.36</b>     | <b>0.69</b> | <b>0.24</b> | <b>0.49</b>       | <b>0.49</b> | <b>0.75</b>    |
|                      |                 | PM                | 0.44            | <b>0.62</b> | <b>0.29</b> | 0.44              | <b>0.36</b>     | <b>0.69</b> | <b>0.24</b> | 0.44              | 0.48        | 0.74           |
|                      | Human           | T                 | 0.42            | 0.60        | 0.28        | 0.45              | 0.34            | 0.66        | 0.23        | 0.46              | 0.47        | 0.72           |
|                      |                 | T                 | 0.44            | 0.61        | <b>0.29</b> | 0.44              | 0.35            | 0.68        | <b>0.24</b> | 0.45              | 0.47        | 0.73           |
| Mouse                | Mouse           | PM                | <b>0.45</b>     | <b>0.63</b> | <b>0.31</b> | <b>0.45</b>       | 0.36            | <b>0.67</b> | 0.25        | <b>0.45</b>       | <b>0.44</b> | <b>0.75</b>    |
|                      |                 | PM                | <b>0.45</b>     | 0.61        | <b>0.31</b> | 0.44              | <b>0.37</b>     | 0.66        | <b>0.26</b> | 0.43              | 0.42        | 0.73           |
|                      | Mouse           | T                 | 0.42            | <b>0.63</b> | 0.30        | 0.44              | 0.36            | 0.65        | 0.25        | 0.43              | 0.42        | 0.73           |
|                      |                 | T                 | 0.44            | 0.60        | 0.30        | 0.43              | <b>0.37</b>     | 0.64        | <b>0.26</b> | 0.42              | 0.41        | 0.71           |
| Rat                  | Rat             | PM                | <b>0.38</b>     | <b>0.64</b> | <b>0.23</b> | <b>0.41</b>       | <b>0.29</b>     | <b>0.69</b> | <b>0.18</b> | <b>0.36</b>       | <b>0.44</b> | <b>0.60</b>    |
|                      |                 | PM                | 0.34            | 0.61        | 0.22        | 0.37              | 0.28            | 0.67        | <b>0.18</b> | 0.33              | 0.42        | 0.58           |
|                      | Rat             | T                 | 0.37            | 0.62        | <b>0.23</b> | 0.40              | 0.28            | 0.67        | <b>0.18</b> | 0.34              | 0.42        | 0.58           |
|                      |                 | T                 | 0.33            | 0.61        | 0.22        | 0.37              | 0.28            | 0.66        | <b>0.18</b> | 0.33              | 0.42        | 0.58           |
| Yeast                | Yeast           | PM                | <b>0.45</b>     | <b>0.72</b> | 0.29        | <b>0.47</b>       | 0.35            | <b>0.77</b> | 0.23        | <b>0.42</b>       | <b>0.50</b> | <b>0.67</b>    |
|                      |                 | PM                | 0.43            | 0.70        | <b>0.30</b> | <b>0.47</b>       | <b>0.38</b>     | 0.75        | <b>0.25</b> | 0.39              | 0.49        | 0.66           |
|                      | Yeast           | T                 | 0.41            | 0.68        | 0.28        | 0.44              | 0.34            | 0.74        | 0.22        | 0.37              | 0.45        | 0.63           |
|                      |                 | T                 | 0.41            | 0.68        | 0.28        | 0.44              | 0.37            | 0.73        | <b>0.25</b> | 0.35              | 0.46        | 0.63           |

<sup>a</sup> Human: 3,575 publications; Mouse: 2,825 publications; Rat: 2,380 publications; Yeast: 1,290 publications.

Tab. 19: Statistical significance (p-value) of the paired t-test between GOTA (PM, species-specific KB) and the other methods over all GO

| Species <sup>a</sup> | KB <sup>b</sup> | Info <sup>c</sup> | $iP_1$       | $iR_{10}$      | $iP_{10}$     | $hR_{10}$     | $hP_{10}$     | $MRR_{10}$ | $R_{10}$  | # <sup>e</sup> <sub>10</sub> |
|----------------------|-----------------|-------------------|--------------|----------------|---------------|---------------|---------------|------------|-----------|------------------------------|
| Human                | Full            | PM                | 0.02073      | <b>0.1420</b>  | <b>1</b>      | <b>0.2781</b> | <b>0.8766</b> | <2.2e-16   | 0.003281  | <b>0.1332</b>                |
|                      |                 | T                 | 1.659e-12    | 2.589e-08      | 3.655e-11     | <2.2e-16      | 6.267e-05     | <2.2e-16   | <2.2e-16  | 9.368e-12                    |
|                      |                 | T                 | 0.008581     | <b>0.05796</b> | <b>0.9785</b> | 0.0001679     | <b>0.2813</b> | <2.2e-16   | 1.163e-07 | 0.002301                     |
| Mouse                | Full            | PM                | <b>0.568</b> | 5.244e-14      | <b>0.9654</b> | 1.191e-06     | <b>0.9996</b> | 5.195e-06  | 0.0001971 | 0.002021                     |
|                      |                 | T                 | 3.392e-07    | 0.0004156      | 0.001139      | 1.963e-10     | 0.003978      | 1.155e-09  | 1.153e-09 | 3.022e-05                    |
|                      |                 | T                 | 0.02507      | <2.2e-16       | 0.009992      | 7.172e-16     | <b>0.9551</b> | 2.278e-09  | 9.867e-11 | 3.799e-08                    |
| Rat                  | Full            | PM                | 2.692e-09    | 2.411e-07      | 0.004839      | 2.166e-05     | 0.006462      | 1.289e-07  | 0.001132  | 0.01125                      |
|                      |                 | T                 | 0.04483      | 5.87e-05       | 0.000701      | 2.559e-10     | <b>0.1558</b> | 4.177e-08  | 7.902e-07 | 3.533e-06                    |
|                      |                 | T                 | 1.285e-10    | 9.218e-08      | 4.207e-05     | 2.119e-08     | 0.0002506     | 3.27e-08   | 0.0001369 | 0.006473                     |
| Yeast                | Full            | PM                | 0.00985      | 0.000915       | <b>0.9862</b> | 0.0001679     | <b>1</b>      | 0.0001380  | 0.03849   | <b>0.1604</b>                |
|                      |                 | T                 | 4.792e-07    | 2.112e-13      | 5.497e-06     | 8.782e-12     | 2.522e-08     | 2.562e-16  | 3.364e-14 | 2.854e-08                    |
|                      |                 | T                 | 8.055e-07    | 5.092e-08      | 0.02096       | 6.917e-10     | <b>1</b>      | 4.528e-16  | 1.020e-06 | 9.152e-05                    |

Not significant p-values are highlighted in bold.

<sup>a</sup> Human: 3,575 publications; Mouse: 2,825 publications; Rat: 2,380 publications; Yeast: 1,290 publications.

Tab. 20: Performance comparison over BP

| Species <sup>a</sup> | KB <sup>b</sup> | Info <sup>c</sup> | IT <sup>d</sup> |             |             | CAFA <sup>d</sup> | BC <sup>d</sup> |             |             | TREC <sup>d</sup> |             | # <sup>e</sup> |
|----------------------|-----------------|-------------------|-----------------|-------------|-------------|-------------------|-----------------|-------------|-------------|-------------------|-------------|----------------|
|                      |                 |                   | $iP_1$          | $iR_{10}$   | $iP_{10}$   | $hF_{max}$        | $hF_{10}$       | $hR_{10}$   | $hP_{10}$   | $MRR_{10}$        | $R_{10}$    |                |
| Human                | Human           | PM                | <b>0.49</b>     | 0.69        | 0.34        | <b>0.48</b>       | 0.34            | <b>0.74</b> | 0.22        | <b>0.36</b>       | <b>0.45</b> | 0.61           |
|                      |                 | PM                | 0.48            | <b>0.70</b> | <b>0.35</b> | <b>0.48</b>       | <b>0.35</b>     | <b>0.74</b> | <b>0.23</b> | 0.35              | <b>0.45</b> | <b>0.62</b>    |
|                      | Human           | T                 | 0.47            | 0.67        | 0.33        | 0.47              | 0.34            | 0.71        | 0.22        | 0.33              | 0.42        | 0.58           |
|                      |                 | T                 | 0.47            | 0.68        | <b>0.35</b> | 0.47              | <b>0.35</b>     | 0.73        | <b>0.23</b> | 0.33              | 0.43        | 0.60           |
| Mouse                | Mouse           | PM                | <b>0.51</b>     | <b>0.70</b> | <b>0.36</b> | <b>0.50</b>       | 0.35            | <b>0.73</b> | 0.23        | <b>0.39</b>       | <b>0.44</b> | <b>0.67</b>    |
|                      |                 | PM                | 0.50            | 0.68        | <b>0.36</b> | 0.49              | <b>0.36</b>     | 0.72        | <b>0.24</b> | 0.38              | <b>0.44</b> | <b>0.67</b>    |
|                      | Mouse           | T                 | <b>0.51</b>     | 0.68        | <b>0.36</b> | 0.48              | 0.35            | 0.71        | 0.23        | 0.37              | 0.42        | 0.64           |
|                      |                 | T                 | 0.49            | 0.67        | <b>0.36</b> | 0.48              | <b>0.36</b>     | 0.71        | <b>0.24</b> | 0.37              | 0.42        | 0.64           |
| Rat                  | Rat             | PM                | <b>0.44</b>     | <b>0.73</b> | <b>0.28</b> | <b>0.48</b>       | <b>0.26</b>     | <b>0.77</b> | <b>0.16</b> | <b>0.35</b>       | <b>0.49</b> | <b>0.58</b>    |
|                      |                 | PM                | 0.41            | 0.68        | 0.27        | 0.44              | <b>0.26</b>     | 0.74        | <b>0.16</b> | 0.32              | 0.46        | 0.55           |
|                      | Rat             | T                 | 0.43            | 0.71        | 0.27        | 0.46              | <b>0.26</b>     | 0.75        | <b>0.16</b> | 0.33              | 0.46        | 0.54           |
|                      |                 | T                 | 0.40            | 0.68        | 0.27        | 0.44              | <b>0.26</b>     | 0.73        | <b>0.16</b> | 0.31              | 0.45        | 0.54           |
| Yeast                | Yeast           | PM                | 0.57            | <b>0.81</b> | 0.38        | <b>0.59</b>       | 0.36            | <b>0.86</b> | 0.23        | <b>0.44</b>       | <b>0.60</b> | <b>0.68</b>    |
|                      |                 | PM                | <b>0.58</b>     | <b>0.81</b> | <b>0.39</b> | <b>0.59</b>       | <b>0.40</b>     | <b>0.86</b> | <b>0.26</b> | 0.42              | <b>0.60</b> | <b>0.68</b>    |
|                      | Yeast           | T                 | 0.54            | 0.79        | 0.37        | 0.56              | 0.36            | 0.84        | 0.23        | 0.39              | 0.55        | 0.64           |
|                      |                 | T                 | 0.55            | 0.78        | 0.38        | 0.57              | 0.38            | 0.83        | 0.25        | 0.39              | 0.55        | 0.65           |

<sup>a</sup> Human: 2,436 publications; Mouse: 2,309 publications; Rat: 1,796 publications; Yeast: 895 publications.



Tab. 21: Statistical significance (p-value) of the paired t-test between GOTA (PM, species-specific KB) and the other methods over BP

| Species <sup>a</sup> | KB <sup>b</sup> | Info <sup>c</sup> | $iP_1$         | $iR_{10}$     | $iP_{10}$     | $hR_{10}$     | $hP_{10}$      | $MRR_{10}$     | $R_{10}$      | $\#_{10}^e$    |
|----------------------|-----------------|-------------------|----------------|---------------|---------------|---------------|----------------|----------------|---------------|----------------|
| Human                | Full            | PM                | <b>0.2581</b>  | <b>0.5873</b> | <b>1</b>      | <b>0.6833</b> | <b>1</b>       | <b>0.09423</b> | <b>0.6476</b> | <b>0.9212</b>  |
| Human                | Human           | T                 | 0.001669       | 1.009e-11     | 1.938e-05     | <2.2e-16      | <b>0.4682</b>  | 6.024e-10      | 7.868e-12     | 5.668e-08      |
| Human                | Full            | T                 | 0.004912       | 0.0006756     | <b>1</b>      | 0.003708      | <b>1</b>       | 3.492e-06      | 0.001510      | <b>0.06634</b> |
| Mouse                | Full            | PM                | <b>0.06664</b> | 5.23e-05      | <b>0.9985</b> | 0.0003303     | <b>1</b>       | 0.0224         | <b>0.1861</b> | <b>0.4773</b>  |
| Mouse                | Mouse           | T                 | <b>0.2501</b>  | 8.74e-10      | <b>0.7094</b> | 1.652e-13     | <b>0.7998</b>  | 3.543e-09      | 6.018e-10     | 8.489e-08      |
| Mouse                | Full            | T                 | 0.00329        | 2.822e-12     | <b>0.8873</b> | 1.440e-09     | <b>1</b>       | 1.609e-06      | 0.0001651     | 0.0001967      |
| Rat                  | Full            | PM                | 2.841e-05      | 1.184e-11     | 0.005126      | 4.982e-10     | <b>0.2569</b>  | 2.668e-06      | 3.764e-05     | 0.00179        |
| Rat                  | Rat             | T                 | <b>0.1173</b>  | 0.0001055     | <b>0.2427</b> | 5.467e-10     | <b>0.882</b>   | 7.125e-08      | 5.181e-07     | 3.671e-07      |
| Rat                  | Full            | T                 | 4.638e-07      | 6.224e-13     | 0.02333       | 8.001e-13     | <b>0.219</b>   | 3.310e-09      | 1.699e-06     | 8.095e-05      |
| Yeast                | Full            | PM                | <b>0.7231</b>  | <b>0.2576</b> | <b>1</b>      | <b>0.1607</b> | <b>1</b>       | 0.008267       | <b>0.4393</b> | <b>0.577</b>   |
| Yeast                | Yeast           | T                 | 1.49e-05       | 3.195e-05     | 0.01912       | 4.723e-05     | <b>0.06464</b> | 1.916e-15      | 5.768e-08     | 1.986e-05      |
| Yeast                | Full            | T                 | 0.009324       | 1.108e-05     | <b>0.988</b>  | 5.47e-06      | <b>1</b>       | 1.319e-09      | 3.728e-05     | 0.00231        |

Not significant p-values are highlighted in bold.

<sup>a</sup> Human: 2,436 publications; Mouse: 2,309 publications; Rat: 1,796 publications; Yeast: 895 publications.

Tab. 22: Performance comparison over MF

| Species <sup>a</sup> | KB <sup>b</sup> | Info <sup>c</sup> | IT <sup>d</sup> |             |             | CAFA <sup>d</sup> | BC <sup>d</sup> |             |             | TREC <sup>d</sup> |             | # <sup>e</sup> |
|----------------------|-----------------|-------------------|-----------------|-------------|-------------|-------------------|-----------------|-------------|-------------|-------------------|-------------|----------------|
|                      |                 |                   | $iP_1$          | $iR_{10}$   | $iP_{10}$   | $hF_{max}$        | $hF_{10}$       | $hR_{10}$   | $hP_{10}$   | $MRR_{10}$        | $R_{10}$    |                |
| Human                | Human           | PM                | <b>0.63</b>     | 0.69        | 0.34        | <b>0.69</b>       | 0.31            | 0.88        | 0.19        | <b>0.63</b>       | 0.73        | 0.83           |
| Human                | Full            | PM                | 0.62            | <b>0.70</b> | <b>0.35</b> | 0.68              | <b>0.33</b>     | <b>0.89</b> | <b>0.20</b> | 0.61              | <b>0.75</b> | <b>0.85</b>    |
| Human                | Human           | T                 | 0.59            | 0.67        | 0.34        | 0.68              | 0.30            | 0.85        | 0.18        | 0.60              | 0.69        | 0.79           |
| Human                | Full            | T                 | 0.62            | 0.69        | 0.34        | 0.68              | 0.31            | 0.88        | 0.19        | 0.62              | 0.73        | 0.83           |
| Mouse                | Mouse           | PM                | 0.61            | 0.69        | 0.34        | <b>0.69</b>       | 0.31            | 0.87        | 0.19        | <b>0.60</b>       | 0.70        | 0.80           |
| Mouse                | Full            | PM                | <b>0.63</b>     | <b>0.70</b> | <b>0.35</b> | 0.68              | <b>0.33</b>     | <b>0.88</b> | <b>0.20</b> | <b>0.60</b>       | <b>0.74</b> | <b>0.84</b>    |
| Mouse                | Mouse           | T                 | 0.57            | 0.69        | 0.34        | 0.67              | 0.31            | 0.86        | 0.19        | 0.57              | 0.68        | 0.79           |
| Mouse                | Full            | T                 | 0.61            | 0.69        | 0.34        | 0.68              | <b>0.33</b>     | <b>0.88</b> | <b>0.20</b> | <b>0.60</b>       | 0.73        | 0.83           |
| Rat                  | Rat             | PM                | 0.54            | <b>0.73</b> | 0.34        | 0.62              | 0.32            | 0.86        | 0.20        | 0.50              | 0.63        | 0.73           |
| Rat                  | Full            | PM                | <b>0.56</b>     | <b>0.73</b> | <b>0.35</b> | 0.63              | <b>0.35</b>     | <b>0.87</b> | <b>0.22</b> | <b>0.51</b>       | <b>0.66</b> | <b>0.77</b>    |
| Rat                  | Rat             | T                 | 0.50            | 0.72        | 0.34        | 0.59              | 0.32            | 0.85        | 0.20        | 0.45              | 0.61        | 0.71           |
| Rat                  | Full            | T                 | 0.55            | 0.72        | <b>0.35</b> | <b>0.64</b>       | 0.34            | 0.86        | 0.21        | <b>0.51</b>       | <b>0.66</b> | <b>0.77</b>    |
| Yeast                | Yeast           | PM                | <b>0.58</b>     | 0.82        | 0.34        | 0.63              | 0.31            | 0.88        | 0.19        | <b>0.46</b>       | 0.66        | 0.70           |
| Yeast                | Full            | PM                | <b>0.58</b>     | <b>0.83</b> | <b>0.37</b> | <b>0.64</b>       | <b>0.35</b>     | <b>0.90</b> | <b>0.22</b> | 0.45              | <b>0.71</b> | <b>0.75</b>    |
| Yeast                | Yeast           | T                 | 0.56            | 0.80        | 0.34        | 0.60              | 0.31            | 0.87        | 0.19        | 0.41              | 0.62        | 0.67           |
| Yeast                | Full            | T                 | 0.53            | 0.82        | 0.36        | 0.60              | 0.34            | 0.88        | 0.21        | 0.39              | 0.67        | 0.71           |

<sup>a</sup> Human: 2,317 publications; Mouse: 1,291 publications; Rat: 858 publications; Yeast: 567 publications.

Tab. 23: Statistical significance (p-value) of the paired t-test between GOTA (PM, species-specific KB) and the other methods over MF

| Species <sup>a</sup> | KB <sup>b</sup> | Info <sup>c</sup> | $iP_1$        | $iR_{10}$     | $iP_{10}$      | $hR_{10}$      | $hP_{10}$      | $MRR_{10}$    | $R_{10}$      | $\#_{10}^e$   |
|----------------------|-----------------|-------------------|---------------|---------------|----------------|----------------|----------------|---------------|---------------|---------------|
| Human                | Full            | PM                | <b>0.3633</b> | <b>0.7189</b> | <b>1</b>       | <b>0.9587</b>  | <b>1</b>       | 0.0005271     | <b>0.9999</b> | <b>0.9998</b> |
| Human                | Human           | T                 | 2.953e-15     | 1.940e-11     | 1.427e-08      | <2.2e-16       | 0.02109        | <2.2e-16      | 8.337e-15     | 1.656e-13     |
| Human                | Full            | T                 | <b>0.3635</b> | 0.03764       | <b>0.8909</b>  | <b>0.07189</b> | <b>0.9999</b>  | 0.01042       | <b>0.7146</b> | <b>0.8425</b> |
| Mouse                | Full            | PM                | <b>0.989</b>  | <b>0.963</b>  | <b>1</b>       | <b>0.9943</b>  | <b>1</b>       | <b>0.6887</b> | <b>1</b>      | <b>1</b>      |
| Mouse                | Mouse           | T                 | 3.257e-08     | 0.02194       | 0.01187        | 0.0004821      | <b>0.07814</b> | 1.252e-07     | 0.0001682     | 0.001578      |
| Mouse                | Full            | T                 | <b>0.5398</b> | <b>0.5274</b> | <b>0.9935</b>  | <b>0.8697</b>  | <b>0.986</b>   | <b>0.434</b>  | <b>0.9962</b> | <b>0.9972</b> |
| Rat                  | Full            | PM                | <b>0.9475</b> | <b>0.6593</b> | <b>0.9984</b>  | <b>0.9102</b>  | <b>1</b>       | <b>0.9569</b> | <b>0.9965</b> | <b>0.9997</b> |
| Rat                  | Rat             | T                 | 3.461e-06     | 0.02670       | <b>0.08627</b> | 0.01678        | <b>0.869</b>   | 4.071e-09     | 0.0003287     | 0.009531      |
| Rat                  | Full            | T                 | <b>0.554</b>  | <b>0.4772</b> | <b>0.9965</b>  | <b>0.6382</b>  | <b>1</b>       | <b>0.8273</b> | <b>0.9919</b> | <b>0.9995</b> |
| Yeast                | Full            | PM                | <b>0.3616</b> | <b>0.856</b>  | <b>1</b>       | <b>0.931</b>   | <b>1</b>       | <b>0.1598</b> | <b>0.9992</b> | <b>0.9985</b> |
| Yeast                | Yeast           | T                 | 0.007898      | 0.005725      | <b>0.2039</b>  | 0.00824        | <b>0.0857</b>  | 2.515e-09     | 0.000652      | 0.001315      |
| Yeast                | Full            | T                 | 0.0001061     | <b>0.5551</b> | <b>0.9989</b>  | <b>0.4334</b>  | <b>1</b>       | 3.779e-06     | <b>0.7824</b> | <b>0.7275</b> |

Not significant p-values are highlighted in bold.

<sup>a</sup> Human: ,2317 publications; Mouse: 1,291 publications; Rat: 858 publications; Yeast: 567 publications.

Tab. 24: Performance comparison over CC

| Species <sup>a</sup> | KB <sup>b</sup> | Info <sup>c</sup> | IT <sup>d</sup>        |                         |                         | CAFA <sup>d</sup>        | BC <sup>d</sup>         |                         |                         | TREC <sup>d</sup>        |                        | # <sup>e</sup> |
|----------------------|-----------------|-------------------|------------------------|-------------------------|-------------------------|--------------------------|-------------------------|-------------------------|-------------------------|--------------------------|------------------------|----------------|
|                      |                 |                   | <i>iP</i> <sub>1</sub> | <i>iR</i> <sub>10</sub> | <i>iP</i> <sub>10</sub> | <i>hF</i> <sub>max</sub> | <i>hF</i> <sub>10</sub> | <i>hR</i> <sub>10</sub> | <i>hP</i> <sub>10</sub> | <i>MRR</i> <sub>10</sub> | <i>R</i> <sub>10</sub> |                |
| Human                | Human           | PM                | <b>0.63</b>            | <b>0.87</b>             | <b>0.43</b>             | <b>0.65</b>              | <b>0.40</b>             | <b>0.91</b>             | <b>0.26</b>             | <b>0.54</b>              | <b>0.74</b>            | <b>0.83</b>    |
| Human                | Full            | PM                | <b>0.63</b>            | <b>0.87</b>             | <b>0.43</b>             | <b>0.65</b>              | <b>0.40</b>             | 0.90                    | <b>0.26</b>             | <b>0.54</b>              | <b>0.74</b>            | <b>0.83</b>    |
| Human                | Human           | T                 | 0.61                   | 0.85                    | 0.42                    | 0.63                     | 0.39                    | 0.89                    | 0.25                    | 0.51                     | 0.71                   | 0.80           |
| Human                | Full            | T                 | 0.61                   | 0.85                    | <b>0.43</b>             | 0.64                     | 0.39                    | 0.90                    | 0.25                    | 0.52                     | 0.72                   | 0.81           |
| Mouse                | Mouse           | PM                | <b>0.62</b>            | <b>0.86</b>             | 0.41                    | <b>0.63</b>              | <b>0.40</b>             | <b>0.89</b>             | <b>0.26</b>             | <b>0.53</b>              | <b>0.72</b>            | <b>0.83</b>    |
| Mouse                | Full            | PM                | 0.60                   | 0.84                    | <b>0.42</b>             | <b>0.63</b>              | <b>0.40</b>             | <b>0.89</b>             | <b>0.26</b>             | 0.51                     | 0.71                   | 0.82           |
| Mouse                | Mouse           | T                 | 0.61                   | 0.85                    | 0.41                    | 0.62                     | <b>0.40</b>             | <b>0.89</b>             | <b>0.26</b>             | 0.51                     | 0.70                   | 0.81           |
| Mouse                | Full            | T                 | 0.61                   | 0.84                    | <b>0.42</b>             | 0.62                     | 0.39                    | 0.88                    | 0.25                    | 0.51                     | 0.69                   | 0.80           |
| Rat                  | Rat             | PM                | 0.60                   | 0.83                    | <b>0.42</b>             | 0.61                     | 0.39                    | 0.87                    | 0.25                    | 0.47                     | 0.66                   | 0.78           |
| Rat                  | Full            | PM                | <b>0.61</b>            | <b>0.84</b>             | <b>0.42</b>             | <b>0.62</b>              | <b>0.40</b>             | <b>0.88</b>             | <b>0.26</b>             | <b>0.48</b>              | <b>0.68</b>            | <b>0.79</b>    |
| Rat                  | Rat             | T                 | 0.60                   | 0.83                    | <b>0.42</b>             | 0.61                     | <b>0.40</b>             | 0.86                    | <b>0.26</b>             | 0.47                     | 0.64                   | 0.76           |
| Rat                  | Full            | T                 | 0.60                   | 0.83                    | <b>0.42</b>             | 0.61                     | 0.39                    | 0.87                    | 0.25                    | <b>0.48</b>              | 0.65                   | 0.77           |
| Yeast                | Yeast           | PM                | <b>0.65</b>            | <b>0.88</b>             | <b>0.46</b>             | 0.68                     | 0.42                    | <b>0.93</b>             | 0.27                    | <b>0.54</b>              | <b>0.76</b>            | 0.81           |
| Yeast                | Full            | PM                | 0.64                   | <b>0.88</b>             | <b>0.46</b>             | <b>0.69</b>              | <b>0.43</b>             | 0.92                    | <b>0.28</b>             | 0.53                     | <b>0.76</b>            | <b>0.82</b>    |
| Yeast                | Yeast           | T                 | 0.63                   | <b>0.88</b>             | 0.45                    | 0.67                     | 0.41                    | 0.92                    | 0.26                    | 0.52                     | 0.73                   | 0.79           |
| Yeast                | Full            | T                 | 0.63                   | 0.87                    | <b>0.46</b>             | 0.67                     | <b>0.43</b>             | 0.92                    | <b>0.28</b>             | 0.51                     | 0.74                   | 0.80           |

<sup>a</sup> Human: 1,426 publications; Mouse: 1,148 publications; Rat: 702 publications; Yeast: 517 publications.

Tab. 25: Statistical significance (p-value) of the paired t-test between GOTA (PM, species-specific KB) and the other methods over CC

| Species <sup>a</sup> | KB <sup>b</sup> | Info <sup>c</sup> | <i>iP</i> <sub>1</sub> | <i>iR</i> <sub>10</sub> | <i>iP</i> <sub>10</sub> | <i>hR</i> <sub>10</sub> | <i>hP</i> <sub>10</sub> | <i>MRR</i> <sub>10</sub> | <i>R</i> <sub>10</sub> | # <sub>10</sub> <sup>e</sup> |
|----------------------|-----------------|-------------------|------------------------|-------------------------|-------------------------|-------------------------|-------------------------|--------------------------|------------------------|------------------------------|
| Human                | Full            | PM                | <b>0.4694</b>          | <b>0.1387</b>           | <b>0.8534</b>           | <b>0.1269</b>           | <b>0.7785</b>           | <b>0.6434</b>            | <b>0.5947</b>          | <b>0.5718</b>                |
| Human                | Human           | T                 | 2.734e-05              | 2.105e-08               | 3.819e-09               | 7.425e-10               | 0.0002031               | 2.421e-09                | 9.9e-07                | 1.009e-05                    |
| Human                | Full            | T                 | 0.002206               | 9.299e-05               | 0.01403                 | 0.001152                | <b>0.2820</b>           | 0.001040                 | 0.00731                | 0.01627                      |
| Mouse                | Full            | PM                | 0.009212               | 0.005181                | <b>0.9999</b>           | <b>0.1063</b>           | 9.696e-06               | 0.03861                  | <b>0.1657</b>          | <b>0.1922</b>                |
| Mouse                | Mouse           | T                 | 0.005044               | 0.04675                 | <b>0.2095</b>           | 0.009322                | <b>0.3462</b>           | 0.0002413                | 0.03106                | 0.02836                      |
| Mouse                | Full            | T                 | 0.02036                | 5.513e-05               | <b>0.9637</b>           | 0.008063                | 1.612e-08               | 0.01039                  | 0.008244               | 0.003736                     |
| Rat                  | Full            | PM                | <b>0.8373</b>          | <b>0.8174</b>           | <b>0.7145</b>           | <b>0.8948</b>           | <b>0.9139</b>           | <b>0.8484</b>            | <b>0.918</b>           | <b>0.8173</b>                |
| Rat                  | Rat             | T                 | <b>0.552</b>           | 0.02819                 | <b>0.5942</b>           | 0.04796                 | <b>0.8859</b>           | <b>0.1345</b>            | 0.02786                | 0.01736                      |
| Rat                  | Full            | T                 | <b>0.6496</b>          | <b>0.08866</b>          | <b>0.1658</b>           | <b>0.2743</b>           | <b>0.4234</b>           | <b>0.6788</b>            | <b>0.2880</b>          | <b>0.1406</b>                |
| Yeast                | Full            | PM                | <b>0.4217</b>          | <b>0.2377</b>           | <b>0.8465</b>           | <b>0.1431</b>           | <b>1</b>                | <b>0.1868</b>            | <b>0.4292</b>          | <b>0.6158</b>                |
| Yeast                | Yeast           | T                 | 0.03855                | 0.04735                 | 0.001149                | <b>0.05504</b>          | <b>0.06051</b>          | 0.0008659                | 0.003346               | 0.03591                      |
| Yeast                | Full            | T                 | 0.03639                | 0.0385                  | <b>0.2468</b>           | 0.01245                 | <b>1</b>                | 0.007506                 | <b>0.06752</b>         | <b>0.2504</b>                |

Not significant p-values are highlighted in bold.

<sup>a</sup> Human: 1,426 publications; Mouse: 1,148 publications; Rat: 702 publications; Yeast: 517 publications.

<sup>b</sup> Knowledge base used for prediction. Full = all available publications in the KB. Human/Mouse/Rat/Yeast = only publications related to Human/Mouse/Rat/Yeast.

<sup>c</sup> Informations used in prediction: PM = title, abstract, references and publication year (PubMed); T = title.

<sup>d</sup> Metrics definitions are in Section 2.3. For each metric and Species, the best result is highlighted in bold.

<sup>e</sup> Fraction of publications for which at least one gold-standard annotation has been correctly predicted.

## 2.2.2 Evaluation of the top-20 predicted GO terms

Tab. 26: Performance comparison over all GO

| Species <sup>a</sup> | KB <sup>b</sup> | Info <sup>c</sup> | IT <sup>d</sup> |             |             | CAFA <sup>d</sup> | BC <sup>d</sup> |             |             | TREC <sup>d</sup> |             | # <sup>e</sup> |
|----------------------|-----------------|-------------------|-----------------|-------------|-------------|-------------------|-----------------|-------------|-------------|-------------------|-------------|----------------|
|                      |                 |                   | $iP_1$          | $iR_{20}$   | $iP_{20}$   | $hF_{max}$        | $hF_{20}$       | $hR_{20}$   | $hP_{20}$   | $MRR_{20}$        | $R_{20}$    |                |
| Human                | Human           | PM                | <b>0.45</b>     | <b>0.69</b> | <b>0.25</b> | <b>0.46</b>       | 0.27            | <b>0.79</b> | 0.16        | <b>0.49</b>       | <b>0.59</b> | 0.82           |
| Human                | Full            | PM                | 0.44            | <b>0.69</b> | <b>0.25</b> | 0.44              | <b>0.28</b>     | <b>0.79</b> | <b>0.17</b> | 0.45              | <b>0.59</b> | <b>0.83</b>    |
| Human                | Human           | T                 | 0.42            | 0.67        | 0.24        | 0.45              | 0.26            | 0.76        | 0.16        | 0.46              | 0.55        | 0.79           |
| Human                | Full            | T                 | 0.44            | <b>0.69</b> | <b>0.25</b> | 0.44              | <b>0.28</b>     | 0.78        | <b>0.17</b> | 0.45              | 0.57        | 0.81           |
| Mouse                | Mouse           | PM                | <b>0.45</b>     | <b>0.72</b> | <b>0.27</b> | <b>0.45</b>       | <b>0.29</b>     | <b>0.77</b> | <b>0.18</b> | <b>0.46</b>       | <b>0.53</b> | <b>0.82</b>    |
| Mouse                | Full            | PM                | <b>0.45</b>     | 0.70        | <b>0.27</b> | 0.44              | <b>0.29</b>     | <b>0.77</b> | <b>0.18</b> | 0.44              | <b>0.53</b> | 0.81           |
| Mouse                | Mouse           | T                 | 0.42            | 0.70        | 0.26        | 0.44              | <b>0.29</b>     | 0.76        | <b>0.18</b> | 0.43              | 0.51        | 0.80           |
| Mouse                | Full            | T                 | 0.44            | 0.69        | <b>0.27</b> | 0.43              | <b>0.29</b>     | 0.76        | <b>0.18</b> | 0.43              | 0.51        | 0.80           |
| Rat                  | Rat             | PM                | <b>0.38</b>     | <b>0.72</b> | 0.19        | <b>0.41</b>       | 0.21            | <b>0.79</b> | 0.12        | <b>0.36</b>       | <b>0.53</b> | <b>0.69</b>    |
| Rat                  | Full            | PM                | 0.34            | 0.70        | 0.19        | 0.37              | 0.21            | 0.77        | 0.12        | 0.33              | 0.51        | 0.67           |
| Rat                  | Rat             | T                 | 0.37            | 0.71        | <b>0.20</b> | 0.40              | <b>0.22</b>     | 0.77        | <b>0.13</b> | 0.34              | 0.51        | 0.67           |
| Rat                  | Full            | T                 | 0.33            | 0.70        | 0.19        | 0.37              | 0.21            | 0.77        | 0.12        | 0.33              | 0.51        | 0.66           |
| Yeast                | Yeast           | PM                | <b>0.45</b>     | <b>0.80</b> | 0.25        | <b>0.47</b>       | 0.27            | <b>0.85</b> | 0.16        | <b>0.42</b>       | <b>0.61</b> | <b>0.76</b>    |
| Yeast                | Full            | PM                | 0.43            | 0.79        | <b>0.26</b> | <b>0.47</b>       | <b>0.30</b>     | <b>0.85</b> | <b>0.18</b> | 0.40              | <b>0.61</b> | <b>0.76</b>    |
| Yeast                | Yeast           | T                 | 0.41            | 0.78        | 0.24        | 0.44              | 0.27            | 0.83        | 0.16        | 0.37              | 0.56        | 0.71           |
| Yeast                | Full            | T                 | 0.41            | 0.78        | 0.25        | 0.44              | 0.28            | 0.84        | 0.17        | 0.36              | 0.58        | 0.73           |

<sup>a</sup> Human: 3,575 publications; Mouse: 2,825 publications; Rat: 2,380 publications; Yeast: 1,290 publications.

Tab. 27: Statistical significance (p-value) of the paired t-test between GOTA (PM,species-specific KB) and the other methods over all GO

| Species <sup>a</sup> | KB <sup>b</sup> | Info <sup>c</sup> | $iP_1$       | $iR_{20}$     | $iP_{20}$     | $hR_{20}$      | $hP_{20}$     | $MRR_{20}$ | $R_{20}$      | # <sup>e</sup> <sub>20</sub> |
|----------------------|-----------------|-------------------|--------------|---------------|---------------|----------------|---------------|------------|---------------|------------------------------|
| Human                | Full            | PM                | 0.02073      | <b>0.5773</b> | <b>1</b>      | <b>0.7016</b>  | <b>1</b>      | <2.2e-16   | <b>0.3049</b> | <b>0.8882</b>                |
| Human                | Human           | T                 | 1.659e-12    | <2.2e-16      | 2.611e-08     | <2.2e-16       | 0.004045      | <2.2e-16   | <2.2e-16      | 5.57e-14                     |
| Human                | Full            | T                 | 0.008581     | 0.00807       | <b>1</b>      | 0.0001703      | <b>0.999</b>  | <2.2e-16   | 8.443e-08     | 0.008668                     |
| Mouse                | Full            | PM                | <b>0.568</b> | 4.597e-05     | <b>1</b>      | <b>0.05988</b> | <b>1</b>      | 8.839e-06  | <b>0.3077</b> | <b>0.1478</b>                |
| Mouse                | Mouse           | T                 | 3.392e-07    | 9.704e-08     | 0.02077       | 1.68e-14       | <b>0.5211</b> | 8.716e-10  | 9.857e-10     | 2.914e-06                    |
| Mouse                | Full            | T                 | 0.02507      | 6.501e-12     | <b>0.8236</b> | 9.279e-08      | <b>1</b>      | 5.375e-09  | 2.827e-05     | 0.0001964                    |
| Rat                  | Full            | PM                | 2.692e-09    | 4.657e-08     | <b>0.092</b>  | 8.969e-06      | <b>0.1533</b> | 8.35e-08   | 0.001245      | 0.01018                      |
| Rat                  | Rat             | T                 | 0.04483      | 0.0002362     | <b>0.9483</b> | 1.243e-07      | <b>0.9806</b> | 4.020e-08  | 4.435e-06     | 2.913e-05                    |
| Rat                  | Full            | T                 | 1.285e-10    | 4.446e-07     | 0.03418       | 1.144e-06      | <b>0.3201</b> | 1.661e-08  | 7.542e-05     | 0.001934                     |
| Yeast                | Full            | PM                | 0.00985      | <b>0.2729</b> | <b>1</b>      | <b>0.3504</b>  | <b>1</b>      | 0.0001778  | <b>0.6285</b> | <b>0.5676</b>                |
| Yeast                | Yeast           | T                 | 4.792e-07    | 6.787e-08     | 0.0009326     | 5.423e-07      | 0.001745      | <2.2e-16   | 2.459e-14     | 2.375e-10                    |
| Yeast                | Full            | T                 | 8.055e-07    | 0.0004433     | <b>0.9957</b> | 0.0008086      | <b>1</b>      | 4.944e-16  | 0.0006018     | 0.003941                     |

Not significant p-values are highlighted in bold

<sup>a</sup> Human: 3,575 publications; Mouse: 2,825 publications; Rat: 2,380 publications; Yeast: 1,290 publications.

Tab. 28: Performance comparison over BP

| Species <sup>a</sup> | KB <sup>b</sup> | Info <sup>c</sup> | IT <sup>d</sup> |             |             | CAFA <sup>d</sup> | BC <sup>d</sup> |             |             | TREC <sup>d</sup> |             | # <sup>e</sup> |
|----------------------|-----------------|-------------------|-----------------|-------------|-------------|-------------------|-----------------|-------------|-------------|-------------------|-------------|----------------|
|                      |                 |                   | $iP_1$          | $iR_{20}$   | $iP_{20}$   | $hF_{max}$        | $hF_{20}$       | $hR_{20}$   | $hP_{20}$   | $MRR_{20}$        | $R_{20}$    |                |
| Human                | Human           | PM                | <b>0.49</b>     | <b>0.76</b> | <b>0.30</b> | <b>0.48</b>       | 0.25            | 0.82        | 0.15        | <b>0.36</b>       | 0.54        | 0.70           |
| Human                | Full            | PM                | 0.48            | <b>0.76</b> | <b>0.30</b> | <b>0.48</b>       | <b>0.27</b>     | <b>0.83</b> | <b>0.16</b> | <b>0.36</b>       | <b>0.55</b> | <b>0.71</b>    |
| Human                | Human           | T                 | 0.47            | 0.74        | 0.29        | 0.47              | 0.25            | 0.79        | 0.15        | 0.34              | 0.50        | 0.66           |
| Human                | Full            | T                 | 0.47            | 0.75        | <b>0.30</b> | 0.47              | <b>0.27</b>     | 0.82        | <b>0.16</b> | 0.34              | 0.52        | 0.68           |
| Mouse                | Mouse           | PM                | <b>0.51</b>     | <b>0.76</b> | <b>0.31</b> | <b>0.50</b>       | 0.25            | <b>0.81</b> | 0.15        | <b>0.40</b>       | 0.52        | 0.73           |
| Mouse                | Full            | PM                | 0.50            | <b>0.76</b> | <b>0.31</b> | 0.49              | <b>0.27</b>     | <b>0.81</b> | <b>0.16</b> | 0.39              | <b>0.54</b> | <b>0.75</b>    |
| Mouse                | Mouse           | T                 | <b>0.51</b>     | 0.75        | <b>0.31</b> | 0.48              | <b>0.27</b>     | 0.80        | <b>0.16</b> | 0.37              | 0.50        | 0.72           |
| Mouse                | Full            | T                 | 0.49            | 0.75        | <b>0.31</b> | 0.48              | <b>0.27</b>     | 0.80        | <b>0.16</b> | 0.37              | 0.51        | 0.73           |
| Rat                  | Rat             | PM                | <b>0.44</b>     | <b>0.78</b> | <b>0.24</b> | <b>0.48</b>       | <b>0.18</b>     | <b>0.84</b> | <b>0.10</b> | <b>0.35</b>       | <b>0.56</b> | <b>0.65</b>    |
| Rat                  | Full            | PM                | 0.41            | 0.75        | 0.23        | 0.44              | <b>0.18</b>     | 0.82        | <b>0.10</b> | 0.32              | 0.54        | 0.63           |
| Rat                  | Rat             | T                 | 0.43            | <b>0.78</b> | <b>0.24</b> | 0.46              | <b>0.18</b>     | 0.83        | <b>0.10</b> | 0.33              | 0.54        | 0.62           |
| Rat                  | Full            | T                 | 0.40            | 0.75        | 0.23        | 0.44              | <b>0.18</b>     | 0.81        | <b>0.10</b> | 0.31              | 0.52        | 0.61           |
| Yeast                | Yeast           | PM                | 0.57            | <b>0.86</b> | 0.33        | <b>0.59</b>       | 0.26            | <b>0.92</b> | 0.15        | <b>0.45</b>       | 0.67        | 0.76           |
| Yeast                | Full            | PM                | <b>0.58</b>     | <b>0.86</b> | <b>0.34</b> | <b>0.59</b>       | <b>0.29</b>     | <b>0.92</b> | <b>0.17</b> | 0.43              | <b>0.69</b> | <b>0.77</b>    |
| Yeast                | Yeast           | T                 | 0.54            | 0.84        | 0.32        | 0.56              | 0.26            | 0.90        | 0.15        | 0.39              | 0.63        | 0.71           |
| Yeast                | Full            | T                 | 0.55            | 0.84        | 0.33        | 0.57              | <b>0.29</b>     | 0.90        | <b>0.17</b> | 0.39              | 0.65        | 0.73           |

<sup>a</sup> Human: 2,436 publications; Mouse: 2,309 publications; Rat: 1,796 publications; Yeast: 895 publications.

Tab. 29: Statistical significance (p-value) of the paired t-test between GOTA (PM,species-specific KB) and the other methods over BP

| Species <sup>a</sup> | KB <sup>b</sup> | Info <sup>c</sup> | $iP_1$         | $iR_{20}$     | $iP_{20}$      | $hR_{20}$     | $hP_{20}$     | $MRR_{20}$    | $R_{20}$      | $\#_{20}^e$   |
|----------------------|-----------------|-------------------|----------------|---------------|----------------|---------------|---------------|---------------|---------------|---------------|
| Human                | Full            | PM                | <b>0.2581</b>  | <b>0.6517</b> | <b>1</b>       | <b>0.8138</b> | <b>1</b>      | <b>0.1012</b> | <b>0.9542</b> | <b>0.9618</b> |
| Human                | Human           | T                 | 0.001669       | <2.2e-16      | 5.076e-06      | <2.2e-16      | <b>0.4166</b> | 2.771e-10     | <2.2e-16      | 2.072e-11     |
| Human                | Full            | T                 | 0.004912       | 0.002397      | <b>1</b>       | 0.006948      | <b>1</b>      | 2.497e-06     | 0.006966      | 0.0481        |
| Mouse                | Full            | PM                | <b>0.06664</b> | <b>0.3218</b> | <b>1</b>       | <b>0.6621</b> | <b>1</b>      | 0.03738       | <b>0.9992</b> | <b>0.9959</b> |
| Mouse                | Mouse           | T                 | <b>0.2501</b>  | 2.355e-05     | <b>0.995</b>   | 3.11e-07      | <b>1</b>      | 8.52e-09      | 8.686e-08     | 0.0005025     |
| Mouse                | Full            | T                 | 0.00329        | 0.0008142     | <b>1</b>       | 0.00588       | <b>1</b>      | 4.668e-06     | <b>0.1925</b> | <b>0.3413</b> |
| Rat                  | Full            | PM                | 2.841e-05      | 2.526e-10     | 0.007573       | 1.978e-06     | <b>0.994</b>  | 2.557e-06     | 0.004912      | 0.01336       |
| Rat                  | Rat             | T                 | <b>0.1173</b>  | 0.009229      | <b>0.7354</b>  | 1.250e-05     | <b>0.9994</b> | 8.657e-08     | 0.001126      | 9.98e-05      |
| Rat                  | Full            | T                 | 4.638e-07      | 3.403e-12     | 0.008482       | 5.066e-11     | <b>0.963</b>  | 2.472e-09     | 5.48e-05      | 0.0001880     |
| Yeast                | Full            | PM                | <b>0.7231</b>  | <b>0.5231</b> | <b>1</b>       | <b>0.4641</b> | <b>1</b>      | 0.009858      | <b>0.964</b>  | <b>0.8594</b> |
| Yeast                | Yeast           | T                 | 1.49e-05       | 5.794e-05     | <b>0.08784</b> | 2.329e-05     | <b>0.1619</b> | 6.818e-16     | 2.175e-08     | 3.403e-08     |
| Yeast                | Full            | T                 | 0.009324       | 9.836e-05     | <b>0.9997</b>  | 0.001809      | <b>1</b>      | 1.154e-09     | 0.01908       | 0.009246      |

Not significant p-values are highlighted in bold.

<sup>a</sup> Human: 2,436 publications; Mouse: 2,309 publications; Rat: 1,796 publications; Yeast: 895 publications.

Tab. 30: Performance comparison over MF

| Species <sup>a</sup> | KB <sup>b</sup> | Info <sup>c</sup> | IT <sup>d</sup> |             |             | CAFA <sup>d</sup> | BC <sup>d</sup> |             |             | TREC <sup>d</sup> |             | $\#^e$      |
|----------------------|-----------------|-------------------|-----------------|-------------|-------------|-------------------|-----------------|-------------|-------------|-------------------|-------------|-------------|
|                      |                 |                   | $iP_1$          | $iR_{20}$   | $iP_{20}$   | $hF_{max}$        | $hF_{20}$       | $hR_{20}$   | $hP_{20}$   | $MRR_{20}$        | $R_{20}$    |             |
| Human                | Human           | PM                | <b>0.63</b>     | <b>0.73</b> | 0.30        | <b>0.69</b>       | <b>0.20</b>     | 0.92        | <b>0.11</b> | <b>0.63</b>       | 0.78        | 0.86        |
| Human                | Full            | PM                | 0.62            | <b>0.73</b> | <b>0.31</b> | 0.68              | <b>0.20</b>     | <b>0.93</b> | <b>0.11</b> | 0.61              | <b>0.81</b> | <b>0.88</b> |
| Human                | Human           | T                 | 0.59            | 0.71        | 0.30        | 0.68              | <b>0.20</b>     | 0.90        | <b>0.11</b> | 0.60              | 0.75        | 0.84        |
| Human                | Full            | T                 | 0.62            | 0.72        | 0.30        | 0.68              | <b>0.20</b>     | 0.92        | <b>0.11</b> | 0.62              | 0.79        | 0.87        |
| Mouse                | Mouse           | PM                | 0.61            | 0.73        | 0.30        | <b>0.69</b>       | 0.20            | 0.91        | 0.11        | 0.60              | 0.75        | 0.84        |
| Mouse                | Full            | PM                | <b>0.63</b>     | <b>0.74</b> | <b>0.31</b> | 0.68              | <b>0.21</b>     | <b>0.92</b> | <b>0.12</b> | <b>0.61</b>       | <b>0.80</b> | <b>0.88</b> |
| Mouse                | Mouse           | T                 | 0.57            | 0.72        | 0.29        | 0.67              | 0.20            | 0.90        | 0.11        | 0.58              | 0.73        | 0.82        |
| Mouse                | Full            | T                 | 0.61            | 0.73        | 0.30        | 0.68              | 0.20            | <b>0.92</b> | 0.11        | 0.60              | 0.78        | 0.86        |
| Rat                  | Rat             | PM                | 0.54            | <b>0.77</b> | 0.30        | 0.62              | 0.21            | <b>0.91</b> | 0.12        | 0.50              | 0.69        | 0.77        |
| Rat                  | Full            | PM                | <b>0.56</b>     | <b>0.77</b> | <b>0.31</b> | 0.63              | <b>0.23</b>     | <b>0.91</b> | <b>0.13</b> | <b>0.52</b>       | <b>0.74</b> | <b>0.83</b> |
| Rat                  | Rat             | T                 | 0.50            | 0.76        | 0.29        | 0.59              | 0.21            | 0.90        | 0.12        | 0.46              | 0.67        | 0.76        |
| Rat                  | Full            | T                 | 0.55            | <b>0.77</b> | 0.30        | <b>0.64</b>       | <b>0.23</b>     | 0.90        | <b>0.13</b> | 0.51              | <b>0.74</b> | <b>0.83</b> |
| Yeast                | Yeast           | PM                | <b>0.58</b>     | 0.84        | 0.30        | 0.63              | 0.20            | 0.92        | 0.11        | <b>0.46</b>       | 0.71        | 0.75        |
| Yeast                | Full            | PM                | <b>0.58</b>     | <b>0.86</b> | <b>0.32</b> | <b>0.64</b>       | <b>0.23</b>     | <b>0.93</b> | <b>0.13</b> | 0.45              | <b>0.78</b> | <b>0.81</b> |
| Yeast                | Yeast           | T                 | 0.56            | 0.84        | 0.30        | 0.60              | 0.20            | 0.91        | 0.11        | 0.41              | 0.70        | 0.74        |
| Yeast                | Full            | T                 | 0.53            | 0.85        | 0.31        | 0.60              | 0.21            | 0.92        | 0.12        | 0.40              | 0.75        | 0.78        |

<sup>a</sup> Human: 2,317 publications; Mouse: 1,291 publications; Rat: 858 publications; Yeast: 567 publications.

Tab. 31: Statistical significance (p-value) of the paired t-test between GOTA (PM, species-specific KB) and the other methods over MF

| Species <sup>a</sup> | KB <sup>b</sup> | Info <sup>c</sup> | $iP_1$        | $iR_{20}$      | $iP_{20}$      | $hR_{20}$      | $hP_{20}$     | $MRR_{20}$    | $R_{20}$      | $\#_{20}^e$   |
|----------------------|-----------------|-------------------|---------------|----------------|----------------|----------------|---------------|---------------|---------------|---------------|
| Human                | Full            | PM                | <b>0.3633</b> | <b>0.08656</b> | <b>0.9944</b>  | <b>0.9522</b>  | <b>1</b>      | 0.0005079     | <b>1</b>      | <b>1</b>      |
| Human                | Human           | T                 | 2.953e-15     | 5.72e-12       | 1.836e-11      | 5.663e-15      | 0.03279       | <2.2e-16      | 7.803e-13     | 9.65e-10      |
| Human                | Full            | T                 | <b>0.3635</b> | 3.096e-05      | <b>0.05813</b> | 0.04899        | <b>0.9656</b> | 0.01180       | <b>0.8784</b> | <b>0.9728</b> |
| Mouse                | Full            | PM                | <b>0.989</b>  | <b>0.9931</b>  | <b>1</b>       | <b>0.9996</b>  | <b>1</b>      | <b>0.7002</b> | <b>1</b>      | <b>1</b>      |
| Mouse                | Mouse           | T                 | 3.257e-08     | 0.01144        | 0.0002722      | 0.001962       | <b>0.1830</b> | 8.506e-08     | 4.678e-07     | 0.0001032     |
| Mouse                | Full            | T                 | <b>0.5398</b> | <b>0.7493</b>  | <b>0.9893</b>  | <b>0.9358</b>  | <b>1</b>      | <b>0.4327</b> | <b>0.9986</b> | <b>0.9971</b> |
| Rat                  | Full            | PM                | <b>0.9475</b> | <b>0.5231</b>  | <b>1</b>       | <b>0.7157</b>  | <b>1</b>      | <b>0.965</b>  | <b>1</b>      | <b>1</b>      |
| Rat                  | Rat             | T                 | 3.461e-06     | 0.0008576      | 0.001456       | 0.0008643      | <b>0.7952</b> | 2.948e-09     | 0.0003527     | 0.009772      |
| Rat                  | Full            | T                 | <b>0.554</b>  | <b>0.3089</b>  | <b>0.9963</b>  | <b>0.3789</b>  | <b>1</b>      | <b>0.8453</b> | <b>0.9998</b> | <b>1</b>      |
| Yeast                | Full            | PM                | <b>0.3616</b> | <b>0.9973</b>  | <b>1</b>       | <b>0.9966</b>  | <b>1</b>      | <b>0.1692</b> | <b>1</b>      | <b>1</b>      |
| Yeast                | Yeast           | T                 | 0.007898      | <b>0.4083</b>  | <b>0.581</b>   | <b>0.09805</b> | <b>0.4584</b> | 3.609e-09     | 0.01883       | 0.04163       |
| Yeast                | Full            | T                 | 0.0001061     | <b>0.9227</b>  | <b>1</b>       | <b>0.906</b>   | <b>1</b>      | 4.909e-06     | <b>0.9657</b> | <b>0.967</b>  |

Not significant p-values are highlighted in bold.

<sup>a</sup> Human: 2,317 publications; Mouse: 1,291 publications; Rat: 858 publications; Yeast: 567 publications.

Tab. 32: Performance comparison over CC

| Species <sup>a</sup> | KB <sup>b</sup> | Info <sup>c</sup> | IT <sup>d</sup>        |                         |                         | CAFA <sup>d</sup>        | BC <sup>d</sup>         |                         |                         | TREC <sup>d</sup>        |                        | # <sup>e</sup> |
|----------------------|-----------------|-------------------|------------------------|-------------------------|-------------------------|--------------------------|-------------------------|-------------------------|-------------------------|--------------------------|------------------------|----------------|
|                      |                 |                   | <i>iP</i> <sub>1</sub> | <i>iR</i> <sub>20</sub> | <i>iP</i> <sub>20</sub> | <i>hF</i> <sub>max</sub> | <i>hF</i> <sub>20</sub> | <i>hR</i> <sub>20</sub> | <i>hP</i> <sub>20</sub> | <i>MRR</i> <sub>20</sub> | <i>R</i> <sub>20</sub> |                |
| Human                | Human           | PM                | <b>0.63</b>            | <b>0.91</b>             | <b>0.38</b>             | <b>0.65</b>              | <b>0.27</b>             | <b>0.95</b>             | <b>0.16</b>             | 0.54                     | 0.82                   | <b>0.89</b>    |
| Human                | Full            | PM                | <b>0.63</b>            | <b>0.91</b>             | <b>0.38</b>             | <b>0.65</b>              | <b>0.27</b>             | <b>0.95</b>             | <b>0.16</b>             | <b>0.55</b>              | <b>0.83</b>            | <b>0.89</b>    |
| Human                | Human           | T                 | 0.61                   | 0.89                    | 0.37                    | 0.63                     | 0.26                    | 0.93                    | 0.15                    | 0.51                     | 0.79                   | 0.86           |
| Human                | Full            | T                 | 0.61                   | 0.90                    | 0.37                    | 0.64                     | <b>0.27</b>             | 0.94                    | <b>0.16</b>             | 0.52                     | 0.80                   | 0.87           |
| Mouse                | Mouse           | PM                | <b>0.62</b>            | <b>0.91</b>             | <b>0.37</b>             | <b>0.63</b>              | <b>0.27</b>             | <b>0.94</b>             | <b>0.16</b>             | <b>0.53</b>              | <b>0.81</b>            | <b>0.89</b>    |
| Mouse                | Full            | PM                | 0.60                   | 0.89                    | <b>0.37</b>             | <b>0.63</b>              | <b>0.27</b>             | <b>0.94</b>             | <b>0.16</b>             | 0.52                     | 0.80                   | <b>0.89</b>    |
| Mouse                | Mouse           | T                 | 0.61                   | 0.90                    | 0.36                    | 0.62                     | <b>0.27</b>             | <b>0.94</b>             | <b>0.16</b>             | 0.52                     | 0.79                   | 0.88           |
| Mouse                | Full            | T                 | 0.61                   | 0.88                    | <b>0.37</b>             | 0.62                     | <b>0.27</b>             | 0.93                    | <b>0.16</b>             | 0.52                     | 0.79                   | 0.88           |
| Rat                  | Rat             | PM                | 0.60                   | 0.87                    | <b>0.38</b>             | 0.61                     | <b>0.27</b>             | 0.92                    | <b>0.16</b>             | 0.48                     | 0.75                   | 0.85           |
| Rat                  | Full            | PM                | <b>0.61</b>            | <b>0.88</b>             | <b>0.38</b>             | <b>0.62</b>              | <b>0.27</b>             | <b>0.93</b>             | <b>0.16</b>             | <b>0.49</b>              | <b>0.77</b>            | <b>0.87</b>    |
| Rat                  | Rat             | T                 | 0.60                   | 0.87                    | <b>0.38</b>             | 0.61                     | <b>0.27</b>             | 0.92                    | <b>0.16</b>             | 0.47                     | 0.74                   | 0.85           |
| Rat                  | Full            | T                 | 0.60                   | <b>0.88</b>             | <b>0.38</b>             | 0.61                     | <b>0.27</b>             | 0.92                    | <b>0.16</b>             | 0.48                     | <b>0.77</b>            | 0.86           |
| Yeast                | Yeast           | PM                | <b>0.65</b>            | <b>0.92</b>             | <b>0.41</b>             | 0.68                     | 0.29                    | <b>0.96</b>             | 0.17                    | <b>0.55</b>              | <b>0.83</b>            | <b>0.87</b>    |
| Yeast                | Full            | PM                | 0.64                   | <b>0.92</b>             | <b>0.41</b>             | <b>0.69</b>              | <b>0.30</b>             | <b>0.96</b>             | <b>0.18</b>             | 0.54                     | <b>0.83</b>            | <b>0.87</b>    |
| Yeast                | Yeast           | T                 | 0.63                   | 0.91                    | 0.40                    | 0.67                     | 0.29                    | 0.95                    | 0.17                    | 0.52                     | 0.81                   | 0.85           |
| Yeast                | Full            | T                 | 0.63                   | 0.91                    | <b>0.41</b>             | 0.67                     | <b>0.30</b>             | 0.95                    | <b>0.18</b>             | 0.52                     | 0.82                   | <b>0.87</b>    |

<sup>a</sup> Human: 1,426 publications; Mouse: 1,148 publications; Rat: 702 publications; Yeast: 517 publications.

Tab. 33: Statistical significance (p-value) of the paired t-test between GOTA (species-specific KB) and the other methods over CC

| Species <sup>a</sup> | KB <sup>b</sup> | Info <sup>c</sup> | <i>iP</i> <sub>1</sub> | <i>iR</i> <sub>20</sub> | <i>iP</i> <sub>20</sub> | <i>hR</i> <sub>20</sub> | <i>hP</i> <sub>20</sub> | <i>MRR</i> <sub>20</sub> | <i>R</i> <sub>20</sub> | # <sub>20</sub> <sup>e</sup> |
|----------------------|-----------------|-------------------|------------------------|-------------------------|-------------------------|-------------------------|-------------------------|--------------------------|------------------------|------------------------------|
| Human                | Full            | PM                | <b>0.4694</b>          | <b>0.09161</b>          | <b>0.7452</b>           | <b>0.2115</b>           | <b>0.9875</b>           | <b>0.6511</b>            | <b>0.92</b>            | <b>0.7684</b>                |
| Human                | Human           | T                 | 2.734e-05              | 1.072e-10               | 2.256e-14               | 1.221e-09               | 2.38e-10                | 1.558e-09                | 1.51e-10               | 3.719e-09                    |
| Human                | Full            | T                 | 0.002206               | 0.0002005               | 0.0002129               | 0.005731                | <b>0.08008</b>          | 0.001007                 | 0.01254                | 0.01547                      |
| Mouse                | Full            | PM                | 0.009212               | 0.004475                | <b>1</b>                | 0.01225                 | <b>0.2568</b>           | 0.03845                  | <b>0.2375</b>          | <b>0.3095</b>                |
| Mouse                | Mouse           | T                 | 0.005044               | 0.0001503               | 5.79e-05                | 7.565e-05               | 0.004472                | 0.0002427                | 0.001004               | 0.02774                      |
| Mouse                | Full            | T                 | 0.02036                | 1.240e-05               | <b>0.9845</b>           | 0.000637                | 0.002810                | 0.01199                  | 0.00908                | 0.03592                      |
| Rat                  | Full            | PM                | <b>0.8373</b>          | <b>0.9476</b>           | <b>0.4139</b>           | <b>0.837</b>            | <b>0.9601</b>           | <b>0.8579</b>            | <b>0.9856</b>          | <b>0.9015</b>                |
| Rat                  | Rat             | T                 | <b>0.552</b>           | <b>0.376</b>            | <b>0.5671</b>           | <b>0.1759</b>           | <b>0.839</b>            | <b>0.1715</b>            | <b>0.2235</b>          | <b>0.1378</b>                |
| Rat                  | Full            | T                 | <b>0.6496</b>          | <b>0.8832</b>           | <b>0.4821</b>           | <b>0.5842</b>           | <b>0.7023</b>           | <b>0.7307</b>            | <b>0.9265</b>          | <b>0.6913</b>                |
| Yeast                | Full            | PM                | <b>0.4217</b>          | <b>0.2693</b>           | <b>0.9995</b>           | <b>0.2292</b>           | <b>1</b>                | <b>0.1746</b>            | <b>0.4142</b>          | <b>0.373</b>                 |
| Yeast                | Yeast           | T                 | 0.03855                | 0.001203                | 0.03608                 | 0.01495                 | <b>0.1372</b>           | 0.0007548                | 0.03622                | 0.03025                      |
| Yeast                | Full            | T                 | 0.03639                | 0.04077                 | <b>0.7963</b>           | 0.04279                 | <b>1</b>                | 0.00732                  | <b>0.2324</b>          | <b>0.3311</b>                |

Not significant p-values are highlighted in bold.

<sup>a</sup> Human: 1426 publications; Mouse: 1148 publications; Rat: 702 publications; Yeast: 517 publications.

<sup>b</sup> Knowledge base used for prediction. Full = all available publications in the KB. Human/Mouse/Rat/Yeast = only publications related to Human/Mouse/Rat/Yeast.

<sup>c</sup> Informations used in prediction: PM = title, abstract, references and publication year (PubMed); T = title.

<sup>d</sup> Metrics definitions are in Section 2.3. For each metric and Species, the best result is highlighted in bold.

<sup>e</sup> Fraction of publications for which at least one gold-standard annotation has been correctly predicted.

## 2.3 Performance comparison with related approaches

### 2.3.1 Evaluation of the top-10 predicted GO terms

Tab. 34: Performance comparison over all GO (412 publications)

| Method <sup>a</sup> | Info <sup>b</sup> | IT <sup>c</sup>        |                         |                         | CAFA <sup>c</sup>        | BC <sup>c</sup>         |                         |                         | TREC <sup>c</sup>        |                        | # <sub>10</sub> <sup>d</sup> |
|---------------------|-------------------|------------------------|-------------------------|-------------------------|--------------------------|-------------------------|-------------------------|-------------------------|--------------------------|------------------------|------------------------------|
|                     |                   | <i>iP</i> <sub>1</sub> | <i>iR</i> <sub>10</sub> | <i>iP</i> <sub>10</sub> | <i>hF</i> <sub>max</sub> | <i>hF</i> <sub>10</sub> | <i>hR</i> <sub>10</sub> | <i>hP</i> <sub>10</sub> | <i>MRR</i> <sub>10</sub> | <i>R</i> <sub>10</sub> |                              |
| GOTA                | PM                | <b>0.42</b>            | <b>0.69</b>             | <b>0.26</b>             | <b>0.42</b>              | <b>0.31</b>             | <b>0.73</b>             | <b>0.20</b>             | <b>0.39</b>              | <b>0.49</b>            | <b>0.62</b>                  |
| GOTA                | T+A               | 0.37                   | 0.68                    | <b>0.26</b>             | 0.41                     | <b>0.31</b>             | <b>0.73</b>             | <b>0.20</b>             | 0.35                     | 0.48                   | <b>0.62</b>                  |
| GOTA                | T                 | 0.39                   | 0.66                    | 0.24                    | 0.39                     | 0.30                    | 0.70                    | 0.19                    | 0.34                     | 0.44                   | 0.58                         |
| GOCat               | T+A               | 0.34                   | 0.64                    | 0.23                    | 0.37                     | 0.30                    | 0.69                    | 0.19                    | 0.29                     | 0.40                   | 0.52                         |
| GOCat               | T                 | 0.30                   | 0.64                    | 0.22                    | 0.36                     | 0.30                    | 0.69                    | 0.19                    | 0.28                     | 0.40                   | 0.53                         |
| RandFR              | N/A               | 0.08                   | 0.21                    | 0.08                    | 0.10                     | 0.10                    | 0.23                    | 0.06                    | 0.03                     | 0.05                   | 0.08                         |
| RandIC              | N/A               | 0.22                   | 0.23                    | 0.17                    | 0.19                     | 0.15                    | 0.30                    | 0.10                    | 0.00                     | 0.01                   | 0.01                         |

Tab. 35: Statistical significance (p-value) of the paired t-test between GOTA (PM) and the other methods over all GO (412 publications)

| Method <sup>a</sup> | Info <sup>b</sup> | <i>iP</i> <sub>1</sub> | <i>iR</i> <sub>10</sub> | <i>iP</i> <sub>10</sub> | <i>hR</i> <sub>10</sub> | <i>hP</i> <sub>10</sub> | <i>MRR</i> <sub>10</sub> | <i>R</i> <sub>10</sub> | # <sub>10</sub> |
|---------------------|-------------------|------------------------|-------------------------|-------------------------|-------------------------|-------------------------|--------------------------|------------------------|-----------------|
| GOTA                | T+A               | 8.399e-06              | <b>0.0884</b>           | 0.009854                | <b>0.1800</b>           | <b>0.4151</b>           | 1.895e-06                | <b>0.06748</b>         | <b>0.3011</b>   |
| GOTA                | T                 | 0.005682               | 0.0003516               | 1.433e-08               | 0.0005758               | 0.002742                | 4.823e-06                | 0.0002105              | 0.002672        |
| GOCat               | T+A               | 0.0001621              | 0.0006705               | 8.252e-09               | 0.001465                | <b>0.05882</b>          | 5.337e-07                | 1.002e-05              | 6.75e-05        |
| GOCat               | T                 | 1.532e-08              | 0.0002619               | 1.772e-15               | 0.0008314               | 0.04761                 | 1.502e-10                | 1.377e-06              | 1.868e-05       |
| RandFR              | N/A               | <2.2e-16               | <2.2e-16                | <2.2e-16                | <2.2e-16                | <2.2e-16                | <2.2e-16                 | <2.2e-16               | <2.2e-16        |
| RandIC              | N/A               | <2.2e-16               | <2.2e-16                | <2.2e-16                | <2.2e-16                | <2.2e-16                | <2.2e-16                 | <2.2e-16               | <2.2e-16        |

Not significant p-values are highlighted in bold.

Tab. 36: Performance comparison over BP (323 publications)

| Method <sup>a</sup> | Info <sup>b</sup> | IT <sup>c</sup>        |                         |                         | CAFA <sup>c</sup>        | BC <sup>c</sup>         |                         |                         | TREC <sup>c</sup>        |                        | # <sub>10</sub> <sup>d</sup> |
|---------------------|-------------------|------------------------|-------------------------|-------------------------|--------------------------|-------------------------|-------------------------|-------------------------|--------------------------|------------------------|------------------------------|
|                     |                   | <i>iP</i> <sub>1</sub> | <i>iR</i> <sub>10</sub> | <i>iP</i> <sub>10</sub> | <i>hF</i> <sub>max</sub> | <i>hF</i> <sub>10</sub> | <i>hR</i> <sub>10</sub> | <i>hP</i> <sub>10</sub> | <i>MRR</i> <sub>10</sub> | <i>R</i> <sub>10</sub> |                              |
| GOTA                | PM                | <b>0.52</b>            | <b>0.76</b>             | <b>0.34</b>             | <b>0.52</b>              | <b>0.32</b>             | <b>0.81</b>             | <b>0.20</b>             | <b>0.41</b>              | <b>0.56</b>            | <b>0.65</b>                  |
| GOTA                | T+A               | 0.49                   | 0.75                    | <b>0.34</b>             | <b>0.52</b>              | <b>0.32</b>             | 0.80                    | <b>0.20</b>             | 0.38                     | 0.54                   | 0.63                         |
| GOTA                | T                 | 0.48                   | 0.72                    | 0.33                    | 0.49                     | 0.31                    | 0.78                    | 0.19                    | 0.37                     | 0.50                   | 0.60                         |
| GOCat               | T+A               | 0.49                   | 0.72                    | 0.33                    | 0.49                     | 0.30                    | 0.77                    | 0.19                    | 0.34                     | 0.47                   | 0.57                         |
| GOCat               | T                 | 0.50                   | 0.69                    | 0.31                    | 0.49                     | 0.29                    | 0.75                    | 0.18                    | 0.33                     | 0.44                   | 0.54                         |
| RandFR              | N/A               | 0.14                   | 0.30                    | 0.15                    | 0.13                     | 0.11                    | 0.31                    | 0.07                    | 0.01                     | 0.03                   | 0.04                         |
| RandIC              | N/A               | 0.28                   | 0.30                    | 0.24                    | 0.26                     | 0.18                    | 0.38                    | 0.12                    | 0.00                     | 0.00                   | 0.00                         |

Tab. 37: Statistical significance (p-value) of the paired t-test between GOTA (PM) and the other methods over BP (323 publications)

| Method <sup>a</sup> | Info <sup>b</sup> | <i>iP</i> <sub>1</sub> | <i>iR</i> <sub>10</sub> | <i>iP</i> <sub>10</sub> | <i>hR</i> <sub>10</sub> | <i>hP</i> <sub>10</sub> | <i>MRR</i> <sub>10</sub> | <i>R</i> <sub>10</sub> | # <sub>10</sub> |
|---------------------|-------------------|------------------------|-------------------------|-------------------------|-------------------------|-------------------------|--------------------------|------------------------|-----------------|
| GOTA                | T+A               | 0.01154                | <b>0.1967</b>           | <b>0.3935</b>           | <b>0.1522</b>           | <b>0.6105</b>           | 0.0007866                | <b>0.06437</b>         | <b>0.137</b>    |
| GOTA                | T                 | 0.003125               | 0.000684                | 0.006526                | 0.002783                | 0.002141                | 0.0001912                | 0.0002183              | 0.001476        |
| GOCat               | T+A               | <b>0.1187</b>          | 0.005677                | <b>0.1041</b>           | 0.002895                | 0.008732                | 0.0002507                | 8.948e-05              | 0.0008239       |
| GOCat               | T                 | <b>0.2011</b>          | 8.96e-06                | 2.575e-05               | 2.727e-06               | 5.808e-07               | 1.185e-05                | 3.019e-07              | 1.328e-05       |
| RandFR              | N/A               | <2.2e-16               | <2.2e-16                | <2.2e-16                | <2.2e-16                | <2.2e-16                | <2.2e-16                 | <2.2e-16               | <2.2e-16        |
| RandIC              | N/A               | <2.2e-16               | <2.2e-16                | <2.2e-16                | <2.2e-16                | <2.2e-16                | <2.2e-16                 | <2.2e-16               | <2.2e-16        |

Not significant p-values are highlighted in bold.

Tab. 38: Performance comparison over MF (138 publications)

| Method <sup>a</sup> | Info <sup>b</sup> | IT <sup>c</sup>        |                         |                         | CAFA <sup>c</sup>        | BC <sup>c</sup>         |                         |                         | TREC <sup>c</sup>        |                        | # <sub>10</sub> <sup>d</sup> |
|---------------------|-------------------|------------------------|-------------------------|-------------------------|--------------------------|-------------------------|-------------------------|-------------------------|--------------------------|------------------------|------------------------------|
|                     |                   | <i>iP</i> <sub>1</sub> | <i>iR</i> <sub>10</sub> | <i>iP</i> <sub>10</sub> | <i>hF</i> <sub>max</sub> | <i>hF</i> <sub>10</sub> | <i>hR</i> <sub>10</sub> | <i>hP</i> <sub>10</sub> | <i>MRR</i> <sub>10</sub> | <i>R</i> <sub>10</sub> |                              |
| GOTA                | PM                | <b>0.68</b>            | <b>0.86</b>             | <b>0.38</b>             | <b>0.71</b>              | <b>0.37</b>             | <b>0.90</b>             | 0.23                    | <b>0.59</b>              | <b>0.75</b>            | <b>0.80</b>                  |
| GOTA                | T+A               | 0.59                   | 0.85                    | 0.37                    | 0.67                     | <b>0.37</b>             | <b>0.90</b>             | 0.23                    | 0.51                     | 0.74                   | 0.78                         |
| GOTA                | T                 | 0.58                   | 0.85                    | 0.37                    | 0.66                     | 0.35                    | 0.89                    | 0.22                    | 0.51                     | 0.72                   | 0.76                         |
| GOCat               | T+A               | 0.54                   | 0.81                    | 0.33                    | 0.63                     | 0.32                    | 0.86                    | 0.20                    | 0.42                     | 0.62                   | 0.64                         |
| GOCat               | T                 | 0.51                   | 0.79                    | 0.33                    | 0.62                     | 0.32                    | 0.85                    | 0.20                    | 0.41                     | 0.62                   | 0.65                         |
| RandFR              | N/A               | 0.25                   | 0.41                    | 0.23                    | 0.31                     | 0.16                    | 0.47                    | 0.10                    | 0.06                     | 0.12                   | 0.14                         |
| RandIC              | N/A               | 0.25                   | 0.24                    | 0.25                    | 0.31                     | 0.31                    | 0.23                    | <b>0.48</b>             | 0.04                     | 0.03                   | 0.04                         |

Tab. 39: Statistical significance (p-value) of the paired t-test between GOTA (PM) and the other methods over MF (138 publications)

| Method <sup>a</sup> | Info <sup>b</sup> | $iP_1$    | $iR_{10}$     | $iP_{10}$      | $hR_{10}$      | $hP_{10}$     | $MRR_{10}$ | $R_{10}$      | $\#_{10}$     |
|---------------------|-------------------|-----------|---------------|----------------|----------------|---------------|------------|---------------|---------------|
| GOTA                | T+A               | 0.0001881 | <b>0.2590</b> | 0.04758        | <b>0.2639</b>  | <b>0.6661</b> | 1.400e-05  | <b>0.1951</b> | <b>0.2081</b> |
| GOTA                | T                 | 0.0001762 | <b>0.1346</b> | <b>0.08272</b> | <b>0.07099</b> | <b>0.1507</b> | 8.784e-06  | 0.04417       | 0.02925       |
| GOCat               | T+A               | 8.935e-05 | 0.01532       | 2.177e-06      | 0.02259        | 0.0008875     | 1.146e-06  | 0.0002914     | 5.817e-05     |
| GOCat               | T                 | 1.639e-06 | 0.001997      | 6.314e-08      | 0.00398        | 0.004182      | 1.832e-07  | 0.0001350     | 9.793e-05     |
| RandFR              | N/A               | <2.2e-16  | <2.2e-16      | <2.2e-16       | <2.2e-16       | <2.2e-16      | <2.2e-16   | <2.2e-16      | <2.2e-16      |
| RandIC              | N/A               | <2.2e-16  | <2.2e-16      | 3.231e-10      | <2.2e-16       | <b>1</b>      | <2.2e-16   | <2.2e-16      | <2.2e-16      |

Not significant p-values are highlighted in bold.

Tab. 40: Performance comparison over CC (83 publications)

| Method <sup>a</sup> | Info <sup>b</sup> | IT <sup>c</sup> |             |             | CAFA <sup>c</sup> |             | BC <sup>c</sup> |             |             | TREC <sup>c</sup> |             | $\#_{10}^d$ |
|---------------------|-------------------|-----------------|-------------|-------------|-------------------|-------------|-----------------|-------------|-------------|-------------------|-------------|-------------|
|                     |                   | $iP_1$          | $iR_{10}$   | $iP_{10}$   | $hF_{max}$        | $hF_{10}$   | $hR_{10}$       | $hP_{10}$   | $MRR_{10}$  | $R_{10}$          |             |             |
| GOTA                | PM                | <b>0.58</b>     | <b>0.86</b> | <b>0.43</b> | <b>0.64</b>       | 0.44        | <b>0.90</b>     | 0.29        | <b>0.44</b> | <b>0.68</b>       | <b>0.71</b> |             |
| GOTA                | T+A               | 0.56            | 0.85        | 0.42        | 0.62              | 0.43        | 0.89            | 0.28        | 0.43        | 0.67              | 0.70        |             |
| GOTA                | T                 | 0.52            | 0.83        | 0.41        | 0.59              | 0.42        | 0.88            | 0.28        | 0.37        | 0.62              | 0.65        |             |
| GOCat               | T+A               | 0.50            | 0.81        | 0.39        | 0.60              | 0.40        | 0.86            | 0.26        | 0.37        | 0.62              | 0.66        |             |
| GOCat               | T                 | 0.50            | 0.78        | 0.38        | 0.58              | 0.40        | 0.84            | 0.26        | 0.34        | 0.56              | 0.60        |             |
| RandFR              | N/A               | 0.41            | 0.62        | 0.33        | 0.47              | 0.34        | 0.66            | 0.23        | 0.16        | 0.37              | 0.40        |             |
| RandIC              | N/A               | 0.42            | 0.41        | 0.42        | 0.49              | <b>0.49</b> | 0.47            | <b>0.51</b> | 0.01        | 0.01              | 0.01        |             |

Tab. 41: Statistical significance (p-value) of the paired t-test between GOTA (PM) and the other methods over CC (83 publications)

| Method <sup>a</sup> | Info <sup>b</sup> | $iP_1$        | $iR_{10}$     | $iP_{10}$      | $hR_{10}$      | $hP_{10}$     | $MRR_{10}$     | $R_{10}$       | $\#_{10}$      |
|---------------------|-------------------|---------------|---------------|----------------|----------------|---------------|----------------|----------------|----------------|
| GOTA                | T+A               | <b>0.2288</b> | <b>0.1858</b> | <b>0.08497</b> | <b>0.1424</b>  | <b>0.4003</b> | <b>0.2762</b>  | <b>0.2351</b>  | <b>0.3287</b>  |
| GOTA                | T                 | 0.0281        | 0.03741       | 0.03818        | 0.02834        | <b>0.3452</b> | 0.01465        | <b>0.06625</b> | <b>0.06625</b> |
| GOCat               | T+A               | 0.02166       | 0.04604       | 0.004627       | <b>0.05275</b> | 0.03565       | <b>0.06891</b> | <b>0.1147</b>  | <b>0.1985</b>  |
| GOCat               | T                 | 0.02317       | 0.00455       | 0.0002335      | 0.01222        | 0.01942       | 0.01131        | 0.01315        | 0.02446        |
| RandFR              | N/A               | 1.049e-05     | 1.887e-09     | 1.179e-10      | 1.390e-10      | 0.0003039     | 4.869e-08      | 3.026e-06      | 4.621e-06      |
| RandIC              | N/A               | 3.247e-05     | <2.2e-16      | <b>0.3656</b>  | <2.2e-16       | <b>1</b>      | 2.337e-14      | <2.2e-16       | <2.2e-16       |

Not significant p-values are highlighted in bold.

<sup>a</sup> Method used for prediction. RandFR and RandIC are baseline predictors.<sup>b</sup> Informations used in prediction: PM = title, abstract, references and publication year (PubMed); T+A = title and abstract; T = title; N/A = no information.<sup>c</sup> Metrics definitions are in Section 2.3. For each metric, the best result is highlighted in bold.<sup>d</sup> Fraction of publications for which at least one gold-standard annotation has been correctly predicted.

## 2.3.2 Evaluation of the top-20 predicted GO terms

Tab. 42: Performance comparison over all GO (412 publications)

| Method <sup>a</sup> | Info <sup>b</sup> | IT <sup>c</sup>        |                         |                         | CAFA <sup>c</sup>        | BC <sup>c</sup>         |                         |                         | TREC <sup>c</sup>        |                        | # <sub>20</sub> <sup>d</sup> |
|---------------------|-------------------|------------------------|-------------------------|-------------------------|--------------------------|-------------------------|-------------------------|-------------------------|--------------------------|------------------------|------------------------------|
|                     |                   | <i>iP</i> <sub>1</sub> | <i>iR</i> <sub>20</sub> | <i>iP</i> <sub>20</sub> | <i>hF</i> <sub>max</sub> | <i>hF</i> <sub>20</sub> | <i>hR</i> <sub>20</sub> | <i>hP</i> <sub>20</sub> | <i>MRR</i> <sub>20</sub> | <i>R</i> <sub>20</sub> |                              |
| GOTA                | PM                | <b>0.42</b>            | <b>0.79</b>             | <b>0.23</b>             | <b>0.42</b>              | <b>0.24</b>             | <b>0.83</b>             | <b>0.14</b>             | <b>0.39</b>              | <b>0.61</b>            | <b>0.73</b>                  |
| GOTA                | T+A               | 0.37                   | 0.77                    | 0.22                    | 0.41                     | <b>0.24</b>             | <b>0.83</b>             | <b>0.14</b>             | 0.35                     | 0.58                   | 0.71                         |
| GOTA                | T                 | 0.39                   | 0.75                    | 0.21                    | 0.39                     | 0.22                    | 0.80                    | 0.13                    | 0.35                     | 0.55                   | 0.67                         |
| GOCat               | T+A               | 0.34                   | 0.74                    | 0.20                    | 0.37                     | 0.22                    | 0.79                    | 0.13                    | 0.30                     | 0.52                   | 0.65                         |
| GOCat               | T                 | 0.30                   | 0.71                    | 0.19                    | 0.36                     | 0.21                    | 0.77                    | 0.12                    | 0.28                     | 0.48                   | 0.60                         |
| RandFR              | N/A               | 0.08                   | 0.32                    | 0.08                    | 0.10                     | 0.10                    | 0.33                    | 0.06                    | 0.03                     | 0.07                   | 0.11                         |
| RandIC              | N/A               | 0.22                   | 0.27                    | 0.17                    | 0.19                     | 0.09                    | 0.36                    | 0.05                    | 0.00                     | 0.01                   | 0.01                         |

Tab. 43: Statistical significance (p-value) of the paired t-test between GOTA (PM) and the other methods over all GO (412 publications)

| Method <sup>a</sup> | Info <sup>b</sup> | <i>iP</i> <sub>1</sub> | <i>iR</i> <sub>20</sub> | <i>iP</i> <sub>20</sub> | <i>hR</i> <sub>20</sub> | <i>hP</i> <sub>20</sub> | <i>MRR</i> <sub>20</sub> | <i>R</i> <sub>20</sub> | # <sub>20</sub> <sup>d</sup> |
|---------------------|-------------------|------------------------|-------------------------|-------------------------|-------------------------|-------------------------|--------------------------|------------------------|------------------------------|
| GOTA                | T+A               | 8.399e-06              | 0.01669                 | 0.02706                 | <b>0.1190</b>           | <b>0.5</b>              | 9.196e-07                | 0.02083                | <b>0.1006</b>                |
| GOTA                | T                 | 0.005682               | 0.0001389               | 1.387e-08               | 0.0009283               | 0.0002931               | 3.388e-06                | 1.467e-05              | 0.0006481                    |
| GOCat               | T+A               | 0.0001621              | 0.000708                | 1.985e-08               | 0.001911                | 0.01285                 | 4.999e-07                | 3.811e-05              | 0.0006538                    |
| GOCat               | T                 | 1.532e-08              | 1.595e-08               | 4.424e-16               | 2.823e-07               | 1.473e-05               | 4.546e-11                | 8.111e-10              | 8.301e-08                    |
| RandFR              | N/A               | <2.2e-16               | <2.2e-16                | <2.2e-16                | <2.2e-16                | <2.2e-16                | <2.2e-16                 | <2.2e-16               | <2.2e-16                     |
| RandIC              | N/A               | <2.2e-16               | <2.2e-16                | 1.532e-14               | <2.2e-16                | <2.2e-16                | <2.2e-16                 | <2.2e-16               | <2.2e-16                     |

Not significant p-values are highlighted in bold.

Tab. 44: Performance comparison over BP (323 publications)

| Method <sup>a</sup> | Info <sup>b</sup> | IT <sup>c</sup>        |                         |                         | CAFA <sup>c</sup>        | BC <sup>c</sup>         |                         |                         | TREC <sup>c</sup>        |                        | # <sub>20</sub> <sup>d</sup> |
|---------------------|-------------------|------------------------|-------------------------|-------------------------|--------------------------|-------------------------|-------------------------|-------------------------|--------------------------|------------------------|------------------------------|
|                     |                   | <i>iP</i> <sub>1</sub> | <i>iR</i> <sub>20</sub> | <i>iP</i> <sub>20</sub> | <i>hF</i> <sub>max</sub> | <i>hF</i> <sub>20</sub> | <i>hR</i> <sub>20</sub> | <i>hP</i> <sub>20</sub> | <i>MRR</i> <sub>20</sub> | <i>R</i> <sub>20</sub> |                              |
| GOTA                | PM                | <b>0.52</b>            | <b>0.81</b>             | <b>0.30</b>             | <b>0.52</b>              | <b>0.23</b>             | <b>0.87</b>             | <b>0.13</b>             | <b>0.42</b>              | <b>0.64</b>            | <b>0.73</b>                  |
| GOTA                | T+A               | 0.49                   | 0.80                    | 0.29                    | <b>0.52</b>              | <b>0.23</b>             | <b>0.87</b>             | <b>0.13</b>             | 0.39                     | 0.61                   | 0.71                         |
| GOTA                | T                 | 0.48                   | 0.79                    | 0.29                    | 0.49                     | <b>0.23</b>             | 0.86                    | <b>0.13</b>             | 0.38                     | 0.58                   | 0.69                         |
| GOCat               | T+A               | 0.49                   | 0.78                    | 0.28                    | 0.49                     | 0.21                    | 0.85                    | 0.12                    | 0.34                     | 0.56                   | 0.65                         |
| GOCat               | T                 | 0.50                   | 0.76                    | 0.27                    | 0.49                     | 0.21                    | 0.83                    | 0.12                    | 0.34                     | 0.52                   | 0.63                         |
| RandFR              | N/A               | 0.14                   | 0.46                    | 0.15                    | 0.14                     | 0.14                    | 0.51                    | 0.08                    | 0.01                     | 0.08                   | 0.13                         |
| RandIC              | N/A               | 0.28                   | 0.34                    | 0.23                    | 0.26                     | 0.11                    | 0.46                    | 0.06                    | 0.00                     | 0.00                   | 0.00                         |

Tab. 45: Statistical significance (p-value) of the paired t-test between GOTA (PM) and the other methods over BP (323 publications)

| Method <sup>a</sup> | Info <sup>b</sup> | <i>iP</i> <sub>1</sub> | <i>iR</i> <sub>20</sub> | <i>iP</i> <sub>20</sub> | <i>hR</i> <sub>20</sub> | <i>hP</i> <sub>20</sub> | <i>MRR</i> <sub>20</sub> | <i>R</i> <sub>20</sub> | # <sub>20</sub> <sup>d</sup> |
|---------------------|-------------------|------------------------|-------------------------|-------------------------|-------------------------|-------------------------|--------------------------|------------------------|------------------------------|
| GOTA                | T+A               | 0.01154                | <b>0.1022</b>           | <b>0.1432</b>           | <b>0.3368</b>           | <b>0.9155</b>           | 0.0005278                | 0.02312                | <b>0.06341</b>               |
| GOTA                | T                 | 0.003125               | 0.0016                  | 0.0001272               | 0.0396                  | 0.0005695               | 0.0001855                | 0.0001331              | 0.005187                     |
| GOCat               | T+A               | <b>0.1187</b>          | 0.02624                 | 0.002076                | 0.02464                 | 0.004969                | 0.0002339                | 0.0002465              | 0.001439                     |
| GOCat               | T                 | <b>0.2011</b>          | 6.893e-05               | 1.083e-06               | 5.473e-05               | 1.067e-07               | 1.018e-05                | 1.828e-07              | 1.528e-05                    |
| RandFR              | N/A               | <2.2e-16               | <2.2e-16                | <2.2e-16                | <2.2e-16                | <2.2e-16                | <2.2e-16                 | <2.2e-16               | <2.2e-16                     |
| RandIC              | N/A               | <2.2e-16               | <2.2e-16                | 4.533e-15               | <2.2e-16                | <2.2e-16                | <2.2e-16                 | <2.2e-16               | <2.2e-16                     |

Not significant p-values are highlighted in bold.

Tab. 46: Performance comparison over MF (138 publications)

| Method <sup>a</sup> | Info <sup>b</sup> | IT <sup>c</sup>        |                         |                         | CAFA <sup>c</sup>        | BC <sup>c</sup>         |                         |                         | TREC <sup>c</sup>        |                        | # <sub>20</sub> <sup>d</sup> |
|---------------------|-------------------|------------------------|-------------------------|-------------------------|--------------------------|-------------------------|-------------------------|-------------------------|--------------------------|------------------------|------------------------------|
|                     |                   | <i>iP</i> <sub>1</sub> | <i>iR</i> <sub>20</sub> | <i>iP</i> <sub>20</sub> | <i>hF</i> <sub>max</sub> | <i>hF</i> <sub>20</sub> | <i>hR</i> <sub>20</sub> | <i>hP</i> <sub>20</sub> | <i>MRR</i> <sub>20</sub> | <i>R</i> <sub>20</sub> |                              |
| GOTA                | PM                | <b>0.68</b>            | <b>0.87</b>             | <b>0.35</b>             | <b>0.71</b>              | 0.29                    | <b>0.92</b>             | 0.17                    | <b>0.59</b>              | <b>0.80</b>            | <b>0.83</b>                  |
| GOTA                | T+A               | 0.59                   | 0.86                    | 0.34                    | 0.67                     | 0.29                    | 0.91                    | 0.17                    | 0.51                     | 0.76                   | 0.80                         |
| GOTA                | T                 | 0.58                   | 0.86                    | 0.34                    | 0.66                     | 0.29                    | 0.91                    | 0.17                    | 0.51                     | 0.75                   | 0.78                         |
| GOCat               | T+A               | 0.54                   | 0.82                    | 0.31                    | 0.63                     | 0.27                    | 0.87                    | 0.16                    | 0.42                     | 0.66                   | 0.67                         |
| GOCat               | T                 | 0.51                   | 0.82                    | 0.31                    | 0.62                     | 0.26                    | 0.87                    | 0.15                    | 0.42                     | 0.65                   | 0.67                         |
| RandFR              | N/A               | 0.25                   | 0.41                    | 0.22                    | 0.31                     | 0.15                    | 0.47                    | 0.09                    | 0.07                     | 0.13                   | 0.16                         |
| RandIC              | N/A               | 0.25                   | 0.24                    | 0.25                    | 0.31                     | <b>0.31</b>             | 0.23                    | <b>0.48</b>             | 0.04                     | 0.03                   | 0.04                         |



Tab. 47: Statistical significance (p-value) of the paired t-test between GOTA (PM) and the other methods over MF (138 publications)

| Method <sup>a</sup> | Info <sup>b</sup> | $iP_1$    | $iR_{20}$     | $iP_{20}$     | $hR_{20}$     | $hP_{20}$     | $MRR_{20}$ | $R_{20}$  | $\#_{20}^d$ |
|---------------------|-------------------|-----------|---------------|---------------|---------------|---------------|------------|-----------|-------------|
| GOTA                | T+A               | 0.0001881 | <b>0.3638</b> | 0.02657       | <b>0.1034</b> | <b>0.4848</b> | 1.067e-05  | 0.00555   | 0.02255     |
| GOTA                | T                 | 0.0001762 | <b>0.2592</b> | <b>0.1702</b> | <b>0.1080</b> | <b>0.1992</b> | 6.814e-06  | 0.004927  | 0.006883    |
| GOCat               | T+A               | 8.935e-05 | 0.01198       | 0.0002518     | 0.008805      | 0.01927       | 9.73e-07   | 4.018e-05 | 7.772e-06   |
| GOCat               | T                 | 1.639e-06 | 0.004354      | 3.987e-06     | 0.001591      | 0.01261       | 1.247e-07  | 1.752e-05 | 1.686e-05   |
| RandFR              | N/A               | <2.2e-16  | <2.2e-16      | <2.2e-16      | <2.2e-16      | 1.324e-14     | <2.2e-16   | <2.2e-16  | <2.2e-16    |
| RandIC              | N/A               | <2.2e-16  | <2.2e-16      | 4.098e-07     | <2.2e-16      | <b>1</b>      | <2.2e-16   | <2.2e-16  | <2.2e-16    |

Not significant p-values are highlighted in bold.

Tab. 48: Performance comparison over CC (83 publications)

| Method <sup>a</sup> | Info <sup>b</sup> | IT <sup>c</sup> |             |             | CAFA <sup>c</sup> |             | BC <sup>c</sup> |             | TREC <sup>c</sup> |             | $\#_{20}^d$ |
|---------------------|-------------------|-----------------|-------------|-------------|-------------------|-------------|-----------------|-------------|-------------------|-------------|-------------|
|                     |                   | $iP_1$          | $iR_{20}$   | $iP_{20}$   | $hF_{max}$        | $hF_{20}$   | $hR_{20}$       | $hP_{20}$   | $MRR_{20}$        | $R_{20}$    |             |
| GOTA                | PM                | <b>0.58</b>     | <b>0.88</b> | <b>0.42</b> | <b>0.64</b>       | 0.42        | <b>0.91</b>     | 0.27        | <b>0.44</b>       | <b>0.71</b> | <b>0.73</b> |
| GOTA                | T+A               | 0.56            | <b>0.88</b> | 0.41        | 0.62              | 0.40        | <b>0.91</b>     | 0.26        | 0.43              | 0.69        | 0.71        |
| GOTA                | T                 | 0.52            | 0.86        | 0.41        | 0.59              | 0.40        | 0.90            | 0.26        | 0.37              | 0.65        | 0.67        |
| GOCat               | T+A               | 0.50            | 0.82        | 0.38        | 0.60              | 0.38        | 0.88            | 0.24        | 0.37              | 0.66        | 0.70        |
| GOCat               | T                 | 0.50            | 0.79        | 0.38        | 0.58              | 0.36        | 0.86            | 0.23        | 0.35              | 0.59        | 0.63        |
| RandFR              | N/A               | 0.41            | 0.65        | 0.31        | 0.47              | 0.26        | 0.73            | 0.16        | 0.17              | 0.40        | 0.43        |
| RandIC              | N/A               | 0.42            | 0.41        | <b>0.42</b> | 0.49              | <b>0.49</b> | 0.47            | <b>0.51</b> | 0.01              | 0.01        | 0.01        |

For each metric, the best result is highlighted in bold.

Tab. 49: Statistical significance (p-value) of the paired t-test between GOTA (PM) and the other methods over CC (83 publications)

| Method <sup>a</sup> | Info <sup>b</sup> | $iP_1$        | $iR_{20}$     | $iP_{20}$     | $hR_{20}$      | $hP_{20}$     | $MRR_{20}$     | $R_{20}$      | $\#_{20}^d$    |
|---------------------|-------------------|---------------|---------------|---------------|----------------|---------------|----------------|---------------|----------------|
| GOTA                | T+A               | <b>0.2288</b> | <b>0.4065</b> | <b>0.2024</b> | <b>0.3352</b>  | <b>0.3957</b> | <b>0.2664</b>  | <b>0.3081</b> | <b>0.2088</b>  |
| GOTA                | T                 | 0.0281        | <b>0.1024</b> | <b>0.1016</b> | <b>0.1524</b>  | <b>0.356</b>  | 0.01548        | <b>0.1002</b> | <b>0.08345</b> |
| GOCat               | T+A               | 0.02166       | 0.0253        | 0.003931      | <b>0.09513</b> | 0.04871       | <b>0.07129</b> | <b>0.1931</b> | <b>0.2473</b>  |
| GOCat               | T                 | 0.02317       | 0.001349      | 0.0002317     | 0.02060        | 0.005946      | 0.01124        | 0.01621       | 0.02446        |
| RandFR              | N/A               | 1.049e-05     | 1.837e-09     | 2.812e-14     | 6.79e-09       | 2.061e-10     | 3.845e-08      | 1.881e-06     | 4.42e-06       |
| RandIC              | N/A               | 3.247e-05     | <2.2e-16      | <b>0.5641</b> | <2.2e-16       | <b>1</b>      | 1.735e-14      | <2.2e-16      | <2.2e-16       |

Not significant p-values are highlighted in bold.

<sup>a</sup> Method used for prediction. RandFR and RandIC are baseline predictors.<sup>b</sup> Informations used in prediction: PM = title, abstract, references and publication year (PubMed); T+A = title and abstract; T = title; N/A = no information.<sup>c</sup> Metrics definitions are in Section 2.3. For each metric, the best result is highlighted in bold.<sup>d</sup> Fraction of publications for which at least one gold-standard annotation has been correctly predicted.

### 3 Testing authorship influence in classification performance

An interesting question is whether authorship can introduce some bias in the experimental testing. In particular, we ask to which extent having in test and training papers from the same author(s) can affect the classification performance. The authorship information can be useful for two reasons: i) the way in which an author writes can be repetitive in some parts and it could affect the text similarities extracted by an automatic classifier, and ii) it is conceivable that an author, or an authors list, could work and publish more than one papers on similar arguments and fields. In order to test the influence of authorship we perform two distinct experiments:

- We test GOTA’s performances on the subset of test publications (319 over 15,000) for which there is not authorship overlap with the publications in the KB (Section 3.1)
- We compare the performances of GOTA with those of a simple k-NN approach that exploits uniquely the authorship information (Section 3.2)

The results of these tests are commented in the two following sections.

#### 3.1 Subset of test-publications with no common author in the KB

In this section we analyze GOTA’s performances over the subset of test publications (319 over 15,000) for which there is not authorship overlap with the publications in the KB. In these tests, GOTA’s performances with full information (PM) are better in comparison to the other approaches, although the overall scores are slightly lower in comparison to GOTA’s performances over the entire set of 15,000 publications (compare, for example, Table 50 with Table 2). The drop in performance accuracy can be observed for all the compared approaches, including the two naive classifiers RandIC and RandFR. The reason of such loss of accuracy is very likely related to the fact that the 319 publications considered in this test are mostly related to *hard* species. In fact, as an example, 39% of the 319 publications are related to Rat in comparison to 16% of the entire test set of 15,000 publications. As a further confirmation, by comparing Tables 50 and 18, we can see that GOTA’s performances on the 319 publications are perfectly consistent with those on the Rat subset.

##### 3.1.1 Evaluation of the top-10 predicted GO terms

Tab. 50: Performance comparison over all GO (319 publications)

| Method <sup>a</sup> | Info <sup>b</sup> | IT <sup>c</sup>        |                         |                         | CAFA <sup>c</sup>        | BC <sup>c</sup>         |                         |                         | TREC <sup>c</sup>        |                        | # <sub>10</sub> <sup>d</sup> |
|---------------------|-------------------|------------------------|-------------------------|-------------------------|--------------------------|-------------------------|-------------------------|-------------------------|--------------------------|------------------------|------------------------------|
|                     |                   | <i>iP</i> <sub>1</sub> | <i>iR</i> <sub>10</sub> | <i>iP</i> <sub>10</sub> | <i>hF</i> <sub>max</sub> | <i>hF</i> <sub>10</sub> | <i>hR</i> <sub>10</sub> | <i>hP</i> <sub>10</sub> | <i>MRR</i> <sub>10</sub> | <i>R</i> <sub>10</sub> |                              |
| GOTA                | PM                | <b>0.39</b>            | <b>0.61</b>             | <b>0.22</b>             | <b>0.40</b>              | <b>0.26</b>             | <b>0.67</b>             | <b>0.16</b>             | <b>0.36</b>              | <b>0.43</b>            | <b>0.57</b>                  |
| GOTA                | T+A               | <b>0.39</b>            | <b>0.61</b>             | 0.21                    | 0.39                     | <b>0.26</b>             | <b>0.67</b>             | <b>0.16</b>             | 0.35                     | 0.42                   | 0.55                         |
| GOTA                | T                 | <b>0.39</b>            | 0.60                    | 0.21                    | 0.39                     | <b>0.26</b>             | 0.66                    | <b>0.16</b>             | 0.35                     | 0.41                   | 0.55                         |
| RandFR              | N/A               | 0.12                   | 0.27                    | 0.10                    | 0.15                     | 0.11                    | 0.30                    | 0.07                    | 0.09                     | 0.10                   | 0.15                         |
| RandIC              | N/A               | 0.20                   | 0.25                    | 0.17                    | 0.15                     | 0.13                    | 0.31                    | 0.08                    | 0.01                     | 0.04                   | 0.06                         |
| GOTA $\Phi_P$       | PM                | 0.32                   | 0.60                    | 0.20                    | 0.39                     | <b>0.26</b>             | 0.65                    | <b>0.16</b>             | 0.33                     | 0.41                   | 0.53                         |
| GOTA $\Phi_P$       | T+A               | 0.31                   | 0.60                    | 0.20                    | 0.37                     | 0.24                    | 0.64                    | 0.15                    | 0.31                     | 0.39                   | 0.53                         |
| GOTA $\Phi_P$       | T                 | 0.31                   | 0.60                    | 0.20                    | 0.37                     | 0.24                    | 0.64                    | 0.15                    | 0.31                     | 0.39                   | 0.53                         |
| GOTA $\Phi_T$       | PM                | 0.20                   | 0.41                    | 0.17                    | 0.27                     | 0.19                    | 0.50                    | 0.12                    | 0.13                     | 0.20                   | 0.28                         |
| GOTA $\Phi_T$       | T+A               | 0.17                   | 0.36                    | 0.16                    | 0.22                     | 0.18                    | 0.45                    | 0.11                    | 0.08                     | 0.15                   | 0.20                         |
| GOTA $\Phi_T$       | T                 | 0.18                   | 0.34                    | 0.15                    | 0.22                     | 0.16                    | 0.43                    | 0.10                    | 0.08                     | 0.13                   | 0.18                         |

For each metric, the best result is highlighted in bold.

Tab. 51: Performance comparison over BP (234 publications)

| Method <sup>a</sup> | Info <sup>b</sup> | IT <sup>c</sup>        |                         |                         | CAFA <sup>c</sup>        | BC <sup>c</sup>         |                         |                         | TREC <sup>c</sup>        |                        | # <sub>10</sub> <sup>d</sup> |
|---------------------|-------------------|------------------------|-------------------------|-------------------------|--------------------------|-------------------------|-------------------------|-------------------------|--------------------------|------------------------|------------------------------|
|                     |                   | <i>iP</i> <sub>1</sub> | <i>iR</i> <sub>10</sub> | <i>iP</i> <sub>10</sub> | <i>hF</i> <sub>max</sub> | <i>hF</i> <sub>10</sub> | <i>hR</i> <sub>10</sub> | <i>hP</i> <sub>10</sub> | <i>MRR</i> <sub>10</sub> | <i>R</i> <sub>10</sub> |                              |
| GOTA                | PM                | 0.43                   | <b>0.66</b>             | <b>0.27</b>             | 0.46                     | <b>0.26</b>             | <b>0.72</b>             | <b>0.16</b>             | 0.33                     | <b>0.43</b>            | <b>0.50</b>                  |
| GOTA                | T+A               | 0.42                   | 0.65                    | <b>0.27</b>             | 0.45                     | 0.25                    | 0.71                    | 0.15                    | 0.32                     | 0.42                   | 0.47                         |
| GOTA                | T                 | 0.42                   | 0.65                    | <b>0.27</b>             | 0.44                     | 0.25                    | 0.71                    | 0.15                    | 0.32                     | <b>0.43</b>            | 0.49                         |
| RandFR              | N/A               | 0.18                   | 0.34                    | 0.17                    | 0.13                     | 0.12                    | 0.33                    | 0.07                    | 0.03                     | 0.04                   | 0.07                         |
| RandIC              | N/A               | 0.27                   | 0.32                    | 0.25                    | 0.22                     | 0.16                    | 0.36                    | 0.10                    | 0.01                     | 0.01                   | 0.01                         |
| GOTA $\Phi_P$       | PM                | <b>0.45</b>            | <b>0.66</b>             | <b>0.27</b>             | <b>0.47</b>              | 0.23                    | 0.71                    | 0.14                    | <b>0.34</b>              | <b>0.43</b>            | 0.49                         |
| GOTA $\Phi_P$       | T+A               | 0.42                   | 0.65                    | <b>0.27</b>             | 0.45                     | 0.25                    | 0.70                    | 0.15                    | 0.32                     | 0.41                   | 0.48                         |
| GOTA $\Phi_P$       | T                 | 0.42                   | 0.65                    | <b>0.27</b>             | 0.44                     | 0.25                    | 0.70                    | 0.15                    | 0.32                     | 0.41                   | 0.48                         |
| GOTA $\Phi_T$       | PM                | 0.25                   | 0.47                    | 0.20                    | 0.32                     | 0.21                    | 0.57                    | 0.13                    | 0.11                     | 0.19                   | 0.24                         |
| GOTA $\Phi_T$       | T+A               | 0.23                   | 0.44                    | 0.19                    | 0.30                     | 0.20                    | 0.54                    | 0.12                    | 0.08                     | 0.14                   | 0.17                         |
| GOTA $\Phi_T$       | T                 | 0.23                   | 0.43                    | 0.19                    | 0.29                     | 0.20                    | 0.53                    | 0.12                    | 0.08                     | 0.13                   | 0.16                         |

For each metric, the best result is highlighted in bold.

Tab. 52: Performance comparison over MF (109 publications)

| Method <sup>a</sup> | Info <sup>b</sup> | IT <sup>c</sup>        |                         |                         | CAFA <sup>c</sup>        | BC <sup>c</sup>         |                         |                         | TREC <sup>c</sup>        |                        | # <sub>10</sub> <sup>d</sup> |
|---------------------|-------------------|------------------------|-------------------------|-------------------------|--------------------------|-------------------------|-------------------------|-------------------------|--------------------------|------------------------|------------------------------|
|                     |                   | <i>iP</i> <sub>1</sub> | <i>iR</i> <sub>10</sub> | <i>iP</i> <sub>10</sub> | <i>hF</i> <sub>max</sub> | <i>hF</i> <sub>10</sub> | <i>hR</i> <sub>10</sub> | <i>hP</i> <sub>10</sub> | <i>MRR</i> <sub>10</sub> | <i>R</i> <sub>10</sub> |                              |
| GOTA                | PM                | <b>0.65</b>            | <b>0.72</b>             | <b>0.32</b>             | <b>0.70</b>              | 0.28                    | <b>0.85</b>             | 0.17                    | <b>0.52</b>              | <b>0.62</b>            | <b>0.69</b>                  |
| GOTA                | T+A               | 0.62                   | <b>0.72</b>             | <b>0.32</b>             | 0.69                     | 0.28                    | <b>0.85</b>             | 0.17                    | 0.50                     | 0.59                   | 0.65                         |
| GOTA                | T                 | 0.63                   | 0.71                    | <b>0.32</b>             | 0.69                     | 0.28                    | 0.84                    | 0.17                    | 0.50                     | 0.59                   | 0.65                         |
| RandFR              | N/A               | 0.36                   | 0.41                    | 0.24                    | 0.46                     | 0.14                    | 0.55                    | 0.08                    | 0.18                     | 0.20                   | 0.22                         |
| RandIC              | N/A               | 0.36                   | 0.43                    | 0.28                    | 0.46                     | <b>0.33</b>             | 0.49                    | <b>0.25</b>             | 0.17                     | 0.19                   | 0.20                         |
| GOTA $\Phi_P$       | PM                | 0.58                   | 0.71                    | 0.31                    | 0.68                     | 0.27                    | 0.84                    | 0.16                    | 0.47                     | 0.59                   | 0.65                         |
| GOTA $\Phi_P$       | T+A               | 0.56                   | 0.70                    | 0.30                    | 0.66                     | 0.27                    | 0.83                    | 0.16                    | 0.43                     | 0.54                   | 0.60                         |
| GOTA $\Phi_P$       | T                 | 0.56                   | 0.70                    | 0.30                    | 0.66                     | 0.27                    | 0.83                    | 0.16                    | 0.43                     | 0.54                   | 0.60                         |
| GOTA $\Phi_T$       | PM                | 0.36                   | 0.54                    | 0.29                    | 0.47                     | 0.30                    | 0.68                    | 0.19                    | 0.23                     | 0.33                   | 0.37                         |
| GOTA $\Phi_T$       | T+A               | 0.32                   | 0.45                    | 0.28                    | 0.45                     | 0.28                    | 0.60                    | 0.18                    | 0.15                     | 0.19                   | 0.22                         |
| GOTA $\Phi_T$       | T                 | 0.30                   | 0.45                    | 0.28                    | 0.44                     | 0.29                    | 0.61                    | 0.19                    | 0.14                     | 0.19                   | 0.22                         |

For each metric, the best result is highlighted in bold.

Tab. 53: Performance comparison over CC (88 publications)

| Method <sup>a</sup> | Info <sup>b</sup> | IT <sup>c</sup>        |                         |                         | CAFA <sup>c</sup>        | BC <sup>c</sup>         |                         |                         | TREC <sup>c</sup>        |                        | # <sub>10</sub> <sup>d</sup> |
|---------------------|-------------------|------------------------|-------------------------|-------------------------|--------------------------|-------------------------|-------------------------|-------------------------|--------------------------|------------------------|------------------------------|
|                     |                   | <i>iP</i> <sub>1</sub> | <i>iR</i> <sub>10</sub> | <i>iP</i> <sub>10</sub> | <i>hF</i> <sub>max</sub> | <i>hF</i> <sub>10</sub> | <i>hR</i> <sub>10</sub> | <i>hP</i> <sub>10</sub> | <i>MRR</i> <sub>10</sub> | <i>R</i> <sub>10</sub> |                              |
| GOTA                | PM                | 0.58                   | 0.85                    | 0.40                    | 0.59                     | 0.34                    | 0.88                    | 0.21                    | <b>0.50</b>              | 0.74                   | 0.81                         |
| GOTA                | T+A               | <b>0.59</b>            | 0.86                    | 0.40                    | <b>0.60</b>              | 0.33                    | 0.89                    | 0.20                    | <b>0.50</b>              | 0.75                   | 0.81                         |
| GOTA                | T                 | 0.57                   | 0.86                    | 0.40                    | 0.58                     | 0.33                    | 0.89                    | 0.20                    | 0.48                     | 0.75                   | 0.81                         |
| RandFR              | N/A               | 0.45                   | 0.71                    | 0.36                    | 0.45                     | 0.34                    | 0.73                    | 0.22                    | 0.25                     | 0.54                   | 0.61                         |
| RandIC              | N/A               | 0.45                   | 0.50                    | <b>0.42</b>             | 0.46                     | <b>0.42</b>             | 0.55                    | <b>0.34</b>             | 0.11                     | 0.20                   | 0.26                         |
| GOTA $\Phi_P$       | PM                | 0.54                   | 0.85                    | 0.39                    | 0.57                     | 0.34                    | 0.88                    | 0.21                    | 0.46                     | 0.73                   | 0.82                         |
| GOTA $\Phi_P$       | T+A               | 0.55                   | <b>0.88</b>             | 0.40                    | 0.56                     | 0.34                    | <b>0.90</b>             | 0.21                    | 0.47                     | <b>0.78</b>            | <b>0.84</b>                  |
| GOTA $\Phi_P$       | T                 | 0.55                   | 0.87                    | 0.40                    | 0.56                     | 0.34                    | <b>0.90</b>             | 0.21                    | 0.46                     | 0.76                   | 0.83                         |
| GOTA $\Phi_T$       | PM                | 0.36                   | 0.41                    | 0.29                    | 0.46                     | 0.32                    | 0.53                    | 0.23                    | 0.16                     | 0.18                   | 0.22                         |
| GOTA $\Phi_T$       | T+A               | 0.34                   | 0.42                    | 0.28                    | 0.44                     | 0.32                    | 0.52                    | 0.23                    | 0.13                     | 0.18                   | 0.19                         |
| GOTA $\Phi_T$       | T                 | 0.32                   | 0.36                    | 0.25                    | 0.42                     | 0.29                    | 0.48                    | 0.21                    | 0.08                     | 0.11                   | 0.12                         |

For each metric, the best result is highlighted in bold.

<sup>a</sup> Method used for prediction. RandFR and RandIC are baseline predictors.<sup>b</sup> Informations used in prediction: PM = title, abstract, references and publication year (PubMed); T+A = title and abstract; T = title; N/A = no information.<sup>c</sup> Metrics definitions are in Section 2.3.<sup>d</sup> Fraction of publications for which at least one gold-standard annotation has been correctly predicted.

## 3.1.2 Evaluation of the top-20 predicted GO terms

Tab. 54: Performance comparison over all GO (319 publications)

| Method <sup>a</sup> | Info <sup>b</sup> | IT <sup>c</sup>        |                         |                         | CAFA <sup>c</sup>        | BC <sup>c</sup>         |                         |                         | TREC <sup>c</sup>        |                        | # <sub>20</sub> <sup>d</sup> |
|---------------------|-------------------|------------------------|-------------------------|-------------------------|--------------------------|-------------------------|-------------------------|-------------------------|--------------------------|------------------------|------------------------------|
|                     |                   | <i>iP</i> <sub>1</sub> | <i>iR</i> <sub>20</sub> | <i>iP</i> <sub>20</sub> | <i>hF</i> <sub>max</sub> | <i>hF</i> <sub>20</sub> | <i>hR</i> <sub>20</sub> | <i>hP</i> <sub>20</sub> | <i>MRR</i> <sub>20</sub> | <i>R</i> <sub>20</sub> |                              |
| GOTA                | PM                | <b>0.39</b>            | 0.69                    | <b>0.19</b>             | <b>0.40</b>              | <b>0.19</b>             | 0.75                    | <b>0.11</b>             | <b>0.37</b>              | 0.50                   | <b>0.63</b>                  |
| GOTA                | T+A               | <b>0.39</b>            | <b>0.70</b>             | <b>0.19</b>             | 0.39                     | 0.18                    | <b>0.76</b>             | 0.10                    | 0.35                     | <b>0.51</b>            | <b>0.63</b>                  |
| GOTA                | T                 | <b>0.39</b>            | 0.69                    | 0.18                    | 0.39                     | 0.18                    | <b>0.76</b>             | 0.10                    | 0.35                     | <b>0.51</b>            | <b>0.63</b>                  |
| RandFR              | N/A               | 0.12                   | 0.39                    | 0.11                    | 0.15                     | 0.10                    | 0.41                    | 0.06                    | 0.09                     | 0.14                   | 0.24                         |
| RandIC              | N/A               | 0.20                   | 0.29                    | 0.17                    | 0.15                     | 0.07                    | 0.37                    | 0.04                    | 0.01                     | 0.04                   | 0.06                         |
| GOTA $\Phi_P$       | PM                | 0.32                   | 0.69                    | 0.17                    | 0.39                     | 0.18                    | 0.75                    | 0.10                    | 0.33                     | 0.50                   | <b>0.63</b>                  |
| GOTA $\Phi_P$       | T+A               | 0.31                   | 0.68                    | 0.17                    | 0.37                     | 0.18                    | 0.74                    | 0.10                    | 0.31                     | 0.48                   | 0.61                         |
| GOTA $\Phi_P$       | T                 | 0.31                   | 0.68                    | 0.17                    | 0.37                     | 0.18                    | 0.74                    | 0.10                    | 0.31                     | 0.48                   | 0.61                         |
| GOTA $\Phi_T$       | PM                | 0.20                   | 0.48                    | 0.16                    | 0.26                     | 0.14                    | 0.57                    | 0.08                    | 0.13                     | 0.25                   | 0.35                         |
| GOTA $\Phi_T$       | T+A               | 0.17                   | 0.44                    | 0.15                    | 0.22                     | 0.14                    | 0.54                    | 0.08                    | 0.09                     | 0.20                   | 0.26                         |
| GOTA $\Phi_T$       | T                 | 0.18                   | 0.42                    | 0.14                    | 0.22                     | 0.14                    | 0.52                    | 0.08                    | 0.08                     | 0.17                   | 0.22                         |

For each metric, the best result is highlighted in bold.

Tab. 55: Performance comparison over BP (234 publications)

| Method <sup>a</sup> | Info <sup>b</sup> | IT <sup>c</sup>        |                         |                         | CAFA <sup>c</sup>        | BC <sup>c</sup>         |                         |                         | TREC <sup>c</sup>        |                        | # <sub>20</sub> <sup>d</sup> |
|---------------------|-------------------|------------------------|-------------------------|-------------------------|--------------------------|-------------------------|-------------------------|-------------------------|--------------------------|------------------------|------------------------------|
|                     |                   | <i>iP</i> <sub>1</sub> | <i>iR</i> <sub>20</sub> | <i>iP</i> <sub>20</sub> | <i>hF</i> <sub>max</sub> | <i>hF</i> <sub>20</sub> | <i>hR</i> <sub>20</sub> | <i>hP</i> <sub>20</sub> | <i>MRR</i> <sub>20</sub> | <i>R</i> <sub>20</sub> |                              |
| GOTA                | PM                | 0.43                   | <b>0.74</b>             | <b>0.24</b>             | 0.46                     | <b>0.18</b>             | <b>0.79</b>             | <b>0.10</b>             | 0.33                     | <b>0.50</b>            | <b>0.56</b>                  |
| GOTA                | T+A               | 0.42                   | 0.73                    | 0.23                    | 0.45                     | <b>0.18</b>             | <b>0.78</b>             | <b>0.10</b>             | 0.32                     | 0.49                   | 0.55                         |
| GOTA                | T                 | 0.42                   | 0.72                    | 0.23                    | 0.44                     | <b>0.18</b>             | 0.78                    | <b>0.10</b>             | 0.32                     | 0.49                   | 0.54                         |
| RandFR              | N/A               | 0.18                   | 0.44                    | 0.15                    | 0.13                     | 0.11                    | 0.46                    | 0.06                    | 0.03                     | 0.09                   | 0.14                         |
| RandIC              | N/A               | 0.27                   | 0.36                    | <b>0.24</b>             | 0.22                     | 0.09                    | 0.46                    | 0.05                    | 0.01                     | 0.01                   | 0.01                         |
| GOTA $\Phi_P$       | PM                | <b>0.45</b>            | <b>0.74</b>             | 0.23                    | <b>0.47</b>              | <b>0.18</b>             | <b>0.79</b>             | <b>0.10</b>             | <b>0.34</b>              | 0.49                   | 0.55                         |
| GOTA $\Phi_P$       | T+A               | 0.42                   | 0.72                    | 0.23                    | 0.45                     | 0.16                    | 0.77                    | 0.09                    | 0.32                     | 0.47                   | 0.54                         |
| GOTA $\Phi_P$       | T                 | 0.42                   | 0.72                    | 0.23                    | 0.44                     | 0.16                    | 0.77                    | 0.09                    | 0.32                     | 0.47                   | 0.54                         |
| GOTA $\Phi_T$       | PM                | 0.25                   | 0.54                    | 0.19                    | 0.32                     | 0.17                    | 0.64                    | <b>0.10</b>             | 0.11                     | 0.25                   | 0.29                         |
| GOTA $\Phi_T$       | T+A               | 0.23                   | 0.51                    | 0.18                    | 0.30                     | 0.16                    | 0.61                    | 0.09                    | 0.08                     | 0.21                   | 0.24                         |
| GOTA $\Phi_T$       | T                 | 0.23                   | 0.49                    | 0.18                    | 0.29                     | 0.16                    | 0.60                    | 0.09                    | 0.09                     | 0.18                   | 0.21                         |

For each metric, the best result is highlighted in bold.

Tab. 56: Performance comparison over MF (109 publications)

| Method <sup>a</sup> | Info <sup>b</sup> | IT <sup>c</sup>        |                         |                         | CAFA <sup>c</sup>        | BC <sup>c</sup>         |                         |                         | TREC <sup>c</sup>        |                        | # <sub>20</sub> <sup>d</sup> |
|---------------------|-------------------|------------------------|-------------------------|-------------------------|--------------------------|-------------------------|-------------------------|-------------------------|--------------------------|------------------------|------------------------------|
|                     |                   | <i>iP</i> <sub>1</sub> | <i>iR</i> <sub>20</sub> | <i>iP</i> <sub>20</sub> | <i>hF</i> <sub>max</sub> | <i>hF</i> <sub>20</sub> | <i>hR</i> <sub>20</sub> | <i>hP</i> <sub>20</sub> | <i>MRR</i> <sub>20</sub> | <i>R</i> <sub>20</sub> |                              |
| GOTA                | PM                | <b>0.65</b>            | <b>0.76</b>             | <b>0.29</b>             | <b>0.70</b>              | 0.18                    | <b>0.89</b>             | 0.10                    | <b>0.52</b>              | <b>0.67</b>            | <b>0.73</b>                  |
| GOTA                | T+A               | 0.62                   | <b>0.76</b>             | <b>0.29</b>             | 0.69                     | 0.18                    | <b>0.89</b>             | 0.10                    | 0.50                     | 0.66                   | 0.72                         |
| GOTA                | T                 | 0.63                   | <b>0.76</b>             | 0.28                    | 0.69                     | 0.18                    | 0.88                    | 0.10                    | 0.50                     | 0.66                   | 0.72                         |
| RandFR              | N/A               | 0.36                   | 0.46                    | 0.23                    | 0.46                     | 0.11                    | 0.58                    | 0.06                    | 0.18                     | 0.21                   | 0.24                         |
| RandIC              | N/A               | 0.36                   | 0.47                    | 0.26                    | 0.46                     | 0.22                    | 0.54                    | 0.14                    | 0.17                     | 0.20                   | 0.22                         |
| GOTA $\Phi_P$       | PM                | 0.58                   | 0.74                    | 0.27                    | 0.68                     | 0.18                    | 0.88                    | 0.10                    | 0.47                     | <b>0.67</b>            | 0.72                         |
| GOTA $\Phi_P$       | T+A               | 0.56                   | 0.75                    | 0.27                    | 0.66                     | 0.18                    | 0.88                    | 0.10                    | 0.44                     | 0.64                   | 0.71                         |
| GOTA $\Phi_P$       | T                 | 0.56                   | 0.75                    | 0.27                    | 0.66                     | 0.18                    | 0.88                    | 0.10                    | 0.44                     | 0.64                   | 0.71                         |
| GOTA $\Phi_T$       | PM                | 0.36                   | 0.56                    | 0.28                    | 0.47                     | <b>0.26</b>             | 0.70                    | <b>0.16</b>             | 0.23                     | 0.35                   | 0.39                         |
| GOTA $\Phi_T$       | T+A               | 0.32                   | 0.48                    | 0.28                    | 0.45                     | <b>0.26</b>             | 0.63                    | <b>0.16</b>             | 0.16                     | 0.25                   | 0.28                         |
| GOTA $\Phi_T$       | T                 | 0.30                   | 0.49                    | 0.28                    | 0.44                     | <b>0.26</b>             | 0.64                    | <b>0.16</b>             | 0.14                     | 0.23                   | 0.28                         |

For each metric, the best result is highlighted in bold.

Tab. 57: Performance comparison over CC (88 publications)

| Method <sup>a</sup> | Info <sup>b</sup> | IT <sup>c</sup>        |                         |                         | CAFA <sup>c</sup>        | BC <sup>c</sup>         |                         |                         | TREC <sup>c</sup>        |                        | # <sub>20</sub> <sup>d</sup> |
|---------------------|-------------------|------------------------|-------------------------|-------------------------|--------------------------|-------------------------|-------------------------|-------------------------|--------------------------|------------------------|------------------------------|
|                     |                   | <i>iP</i> <sub>1</sub> | <i>iR</i> <sub>20</sub> | <i>iP</i> <sub>20</sub> | <i>hF</i> <sub>max</sub> | <i>hF</i> <sub>20</sub> | <i>hR</i> <sub>20</sub> | <i>hP</i> <sub>20</sub> | <i>MRR</i> <sub>20</sub> | <i>R</i> <sub>20</sub> |                              |
| GOTA                | PM                | 0.58                   | <b>0.90</b>             | 0.35                    | 0.59                     | 0.23                    | <b>0.93</b>             | 0.13                    | <b>0.51</b>              | 0.81                   | 0.88                         |
| GOTA                | T+A               | <b>0.59</b>            | 0.89                    | 0.35                    | <b>0.60</b>              | 0.23                    | 0.92                    | 0.13                    | 0.50                     | 0.82                   | 0.88                         |
| GOTA                | T                 | 0.57                   | 0.89                    | 0.35                    | 0.58                     | 0.23                    | 0.92                    | 0.13                    | 0.49                     | 0.82                   | 0.88                         |
| RandFR              | N/A               | 0.45                   | 0.81                    | 0.33                    | 0.45                     | 0.23                    | 0.84                    | 0.13                    | 0.26                     | 0.63                   | 0.73                         |
| RandIC              | N/A               | 0.45                   | 0.58                    | <b>0.37</b>             | 0.46                     | 0.26                    | 0.64                    | 0.16                    | 0.11                     | 0.29                   | 0.35                         |
| GOTA $\Phi_P$       | PM                | 0.54                   | <b>0.90</b>             | 0.35                    | 0.57                     | 0.23                    | <b>0.93</b>             | 0.13                    | 0.47                     | <b>0.83</b>            | <b>0.89</b>                  |
| GOTA $\Phi_P$       | T+A               | 0.55                   | 0.89                    | 0.35                    | 0.56                     | 0.23                    | <b>0.93</b>             | 0.13                    | 0.47                     | 0.82                   | 0.88                         |
| GOTA $\Phi_P$       | T                 | 0.55                   | 0.89                    | 0.35                    | 0.56                     | 0.23                    | <b>0.93</b>             | 0.13                    | 0.47                     | 0.82                   | 0.88                         |
| GOTA $\Phi_T$       | PM                | 0.36                   | 0.42                    | 0.29                    | 0.46                     | <b>0.32</b>             | 0.53                    | <b>0.23</b>             | 0.16                     | 0.19                   | 0.23                         |
| GOTA $\Phi_T$       | T+A               | 0.34                   | 0.42                    | 0.28                    | 0.44                     | <b>0.32</b>             | 0.53                    | <b>0.23</b>             | 0.13                     | 0.19                   | 0.20                         |
| GOTA $\Phi_T$       | T                 | 0.32                   | 0.35                    | 0.25                    | 0.42                     | 0.28                    | 0.48                    | 0.20                    | 0.08                     | 0.11                   | 0.12                         |

For each metric, the best result is highlighted in bold.

<sup>a</sup> Method used for prediction. RandFR and RandIC are baseline predictors.

<sup>b</sup> Informations used in prediction: PM = title, abstract, references and publication year (PubMed); T+A = title and abstract; T = title; N/A = no information.

<sup>c</sup> Metrics definitions are in Section 2.3.

<sup>d</sup> Fraction of publications for which at least one gold-standard annotation has been correctly predicted.

## 3.2 Subset of test-publications with common author in the KB

In this section we investigate the prediction capabilities associated to the authorship information. We consider uniquely the subset of test publications (14,681 over 15,000) for which there is some authorship overlap with the publications in the KB. We implemented a new k-NN baseline classifier that simply exploits the amount of overlap between the author names associated to two publications. The author-based k-NN approach (indicated as k-NN in the following tables) is quite similar to the approach implemented for the similarity score  $\Phi_P$  in Eq. 2 of the paper:

1. we define the similarity score between two publications as the fraction of their common authors;
2. given a query publication, we use the author-based similarity score to select from the KB the top-150 most similar documents;
3. we transfer the weighted annotations from the 150 selected publications to the query.

We further include in the comparison a modified version of the original  $\Phi_P$  score (which we indicate as GOTA  $\Phi_P^*$  in the following tables): the k-NN approach that implements the  $\Phi_P$  score has been modified in order to simply ignore publications in the KB when it detects some authorship overlap with the query. In practice, the GOTA  $\Phi_P^*$  classifiers makes use of all the information in the KB that is ignored by the author-based k-NN classifier (and conversely).

In the following tables we can notice that the performances of the author-based k-NN approach are significantly better than those of the two random classifiers RandIC and RandFR. On the other end, they are still quite low in comparison to GOTA's capabilities. We can also notice that the k-NN approach GOTA  $\Phi_P^*$  performs overall better than author-based k-NN classifier. These results suggest that, although authorship information can indirectly introduce some favorable bias in the classification, this is not the strongest source of information for GOTA. A further confirmation of this fact comes from the comparison between GOTA  $\Phi_P^*$  and GOTA  $\Phi_P$  performances, which are almost indistinguishable.

## 3.2.1 Evaluation of the top-10 predicted GO terms

Tab. 58: Performance comparison over all GO (14,681 publications)

| Method <sup>a</sup> | Info <sup>b</sup> | IT <sup>c</sup> |             |             | CAFA <sup>c</sup> | BC <sup>c</sup> |             |             | TREC <sup>c</sup> |             | # <sub>10</sub> <sup>d</sup> |
|---------------------|-------------------|-----------------|-------------|-------------|-------------------|-----------------|-------------|-------------|-------------------|-------------|------------------------------|
|                     |                   | $iP_1$          | $iR_{10}$   | $iP_{10}$   | $hF_{max}$        | $hF_{10}$       | $hR_{10}$   | $hP_{10}$   | $MRR_{10}$        | $R_{10}$    |                              |
| GOTA                | PM                | <b>0.43</b>     | <b>0.64</b> | <b>0.28</b> | <b>0.43</b>       | <b>0.35</b>     | <b>0.69</b> | <b>0.23</b> | <b>0.40</b>       | <b>0.46</b> | <b>0.69</b>                  |
| GOTA                | T+A               | 0.42            | <b>0.64</b> | <b>0.28</b> | <b>0.43</b>       | 0.34            | 0.68        | <b>0.23</b> | 0.39              | 0.45        | 0.67                         |
| GOTA                | T                 | 0.41            | 0.63        | <b>0.28</b> | 0.42              | 0.34            | 0.68        | <b>0.23</b> | 0.39              | 0.44        | 0.67                         |
| RandFR              | N/A               | 0.20            | 0.33        | 0.15        | 0.20              | 0.17            | 0.33        | 0.11        | 0.18              | 0.15        | 0.28                         |
| RandIC              | N/A               | 0.21            | 0.27        | 0.20        | 0.18              | 0.17            | 0.31        | 0.12        | 0.03              | 0.08        | 0.15                         |
| k-NN                | AN                | 0.29            | 0.50        | 0.21        | 0.33              | 0.26            | 0.54        | 0.17        | 0.26              | 0.26        | 0.44                         |
| GOTA $\Phi_P^*$     | PM                | 0.36            | 0.62        | 0.25        | 0.40              | 0.33            | 0.66        | 0.22        | 0.37              | 0.41        | 0.63                         |
| GOTA $\Phi_P$       | PM                | 0.37            | <b>0.64</b> | 0.26        | 0.41              | 0.34            | 0.67        | <b>0.23</b> | 0.38              | 0.44        | 0.66                         |
| GOTA $\Phi_P$       | T+A               | 0.36            | 0.62        | 0.25        | 0.40              | 0.33            | 0.66        | 0.22        | 0.36              | 0.41        | 0.64                         |
| GOTA $\Phi_P$       | T                 | 0.36            | 0.62        | 0.25        | 0.40              | 0.33            | 0.66        | 0.22        | 0.36              | 0.41        | 0.64                         |
| GOTA $\Phi_T$       | PM                | 0.28            | 0.41        | 0.22        | 0.30              | 0.26            | 0.49        | 0.18        | 0.16              | 0.17        | 0.32                         |
| GOTA $\Phi_T$       | T+A               | 0.24            | 0.37        | 0.20        | 0.27              | 0.24            | 0.46        | 0.16        | 0.11              | 0.12        | 0.23                         |
| GOTA $\Phi_T$       | T                 | 0.23            | 0.35        | 0.19        | 0.26              | 0.22            | 0.44        | 0.15        | 0.09              | 0.10        | 0.19                         |

For each metric, the best result is highlighted in bold.

Tab. 59: Performance comparison over BP (11,008 publications)

| Method <sup>a</sup> | Info <sup>b</sup> | IT <sup>c</sup> |             |             | CAFA <sup>c</sup> | BC <sup>c</sup> |             |             | TREC <sup>c</sup> |             | # <sub>10</sub> <sup>d</sup> |
|---------------------|-------------------|-----------------|-------------|-------------|-------------------|-----------------|-------------|-------------|-------------------|-------------|------------------------------|
|                     |                   | $iP_1$          | $iR_{10}$   | $iP_{10}$   | $hF_{max}$        | $hF_{10}$       | $hR_{10}$   | $hP_{10}$   | $MRR_{10}$        | $R_{10}$    |                              |
| GOTA                | PM                | <b>0.50</b>     | <b>0.72</b> | <b>0.34</b> | <b>0.50</b>       | <b>0.34</b>     | <b>0.76</b> | <b>0.22</b> | <b>0.38</b>       | <b>0.49</b> | <b>0.64</b>                  |
| GOTA                | T+A               | 0.49            | 0.71        | <b>0.34</b> | 0.49              | <b>0.34</b>     | 0.75        | <b>0.22</b> | 0.37              | 0.47        | 0.62                         |
| GOTA                | T                 | 0.49            | 0.70        | <b>0.34</b> | 0.49              | <b>0.34</b>     | 0.75        | <b>0.22</b> | 0.36              | 0.47        | 0.62                         |
| RandFR              | N/A               | 0.21            | 0.35        | 0.20        | 0.17              | 0.16            | 0.35        | 0.10        | 0.04              | 0.06        | 0.10                         |
| RandIC              | N/A               | 0.29            | 0.32        | 0.26        | 0.26              | 0.20            | 0.36        | 0.14        | 0.01              | 0.01        | 0.03                         |
| k-NN                | AN                | 0.35            | 0.55        | 0.25        | 0.37              | 0.26            | 0.60        | 0.17        | 0.19              | 0.23        | 0.32                         |
| GOTA $\Phi_P^*$     | PM                | 0.47            | 0.69        | 0.32        | 0.47              | 0.33            | 0.74        | 0.21        | 0.33              | 0.44        | 0.58                         |
| GOTA $\Phi_P$       | PM                | 0.48            | 0.71        | 0.33        | 0.48              | 0.33            | 0.75        | 0.21        | 0.36              | 0.46        | 0.61                         |
| GOTA $\Phi_P$       | T+A               | 0.47            | 0.69        | 0.33        | 0.47              | 0.33            | 0.74        | 0.21        | 0.33              | 0.44        | 0.59                         |
| GOTA $\Phi_P$       | T                 | 0.47            | 0.69        | 0.33        | 0.47              | 0.33            | 0.74        | 0.21        | 0.33              | 0.44        | 0.59                         |
| GOTA $\Phi_T$       | PM                | 0.33            | 0.51        | 0.27        | 0.37              | 0.29            | 0.59        | 0.19        | 0.15              | 0.21        | 0.31                         |
| GOTA $\Phi_T$       | T+A               | 0.29            | 0.47        | 0.25        | 0.34              | 0.27            | 0.56        | 0.18        | 0.11              | 0.15        | 0.22                         |
| GOTA $\Phi_T$       | T                 | 0.27            | 0.45        | 0.24        | 0.32              | 0.26            | 0.54        | 0.17        | 0.09              | 0.13        | 0.19                         |

For each metric, the best result is highlighted in bold.

Tab. 60: Performance comparison over MF (6,910 publications)

| Method <sup>a</sup> | Info <sup>b</sup> | IT <sup>c</sup> |             |             | CAFA <sup>c</sup> | BC <sup>c</sup> |             |             | TREC <sup>c</sup> |             | # <sub>10</sub> <sup>d</sup> |
|---------------------|-------------------|-----------------|-------------|-------------|-------------------|-----------------|-------------|-------------|-------------------|-------------|------------------------------|
|                     |                   | $iP_1$          | $iR_{10}$   | $iP_{10}$   | $hF_{max}$        | $hF_{10}$       | $hR_{10}$   | $hP_{10}$   | $MRR_{10}$        | $R_{10}$    |                              |
| GOTA                | PM                | <b>0.60</b>     | <b>0.75</b> | <b>0.35</b> | <b>0.65</b>       | 0.33            | <b>0.88</b> | 0.20        | <b>0.54</b>       | <b>0.71</b> | <b>0.79</b>                  |
| GOTA                | T+A               | 0.57            | 0.74        | <b>0.35</b> | 0.64              | 0.33            | <b>0.88</b> | 0.20        | 0.52              | 0.70        | 0.78                         |
| GOTA                | T                 | 0.57            | 0.74        | <b>0.35</b> | 0.64              | 0.33            | <b>0.87</b> | 0.20        | 0.52              | 0.69        | 0.77                         |
| RandFR              | N/A               | 0.43            | 0.46        | 0.27        | 0.49              | 0.17            | 0.59        | 0.10        | 0.31              | 0.32        | 0.40                         |
| RandIC              | N/A               | 0.43            | 0.45        | 0.32        | 0.49              | <b>0.35</b>     | 0.50        | <b>0.27</b> | 0.29              | 0.26        | 0.32                         |
| k-NN                | AN                | 0.46            | 0.57        | 0.29        | 0.54              | 0.29            | 0.70        | 0.18        | 0.37              | 0.43        | 0.52                         |
| GOTA $\Phi_P^*$     | PM                | 0.54            | 0.73        | 0.34        | 0.64              | 0.31            | 0.86        | 0.19        | 0.50              | 0.66        | 0.74                         |
| GOTA $\Phi_P$       | PM                | 0.55            | <b>0.75</b> | 0.34        | <b>0.65</b>       | 0.31            | <b>0.88</b> | 0.19        | 0.52              | 0.69        | 0.77                         |
| GOTA $\Phi_P$       | T+A               | 0.53            | 0.74        | 0.34        | 0.62              | 0.31            | <b>0.87</b> | 0.19        | 0.49              | 0.67        | 0.75                         |
| GOTA $\Phi_P$       | T                 | 0.53            | 0.74        | 0.34        | 0.63              | 0.31            | <b>0.87</b> | 0.19        | 0.49              | 0.67        | 0.75                         |
| GOTA $\Phi_T$       | PM                | 0.36            | 0.50        | 0.29        | 0.48              | 0.32            | 0.66        | 0.21        | 0.17              | 0.25        | 0.30                         |
| GOTA $\Phi_T$       | T+A               | 0.32            | 0.45        | 0.27        | 0.44              | 0.30            | 0.62        | 0.20        | 0.12              | 0.18        | 0.23                         |
| GOTA $\Phi_T$       | T                 | 0.30            | 0.44        | 0.27        | 0.43              | 0.29            | 0.61        | 0.19        | 0.10              | 0.17        | 0.21                         |

For each metric, the best result is highlighted in bold.

Tab. 61: Performance comparison over CC (5,114 publications)

| Method <sup>a</sup> | Info <sup>b</sup> | IT <sup>c</sup>        |                         |                         | CAFA <sup>c</sup>        | BC <sup>c</sup>         |                         |                         | TREC <sup>c</sup>        |                        | # <sub>10</sub> <sup>d</sup> |
|---------------------|-------------------|------------------------|-------------------------|-------------------------|--------------------------|-------------------------|-------------------------|-------------------------|--------------------------|------------------------|------------------------------|
|                     |                   | <i>iP</i> <sub>1</sub> | <i>iR</i> <sub>10</sub> | <i>iP</i> <sub>10</sub> | <i>hF</i> <sub>max</sub> | <i>hF</i> <sub>10</sub> | <i>hR</i> <sub>10</sub> | <i>hP</i> <sub>10</sub> | <i>MRR</i> <sub>10</sub> | <i>R</i> <sub>10</sub> |                              |
| GOTA                | PM                | <b>0.62</b>            | <b>0.86</b>             | 0.43                    | <b>0.64</b>              | 0.40                    | <b>0.90</b>             | 0.26                    | <b>0.52</b>              | <b>0.73</b>            | <b>0.81</b>                  |
| GOTA                | T+A               | 0.61                   | 0.85                    | 0.42                    | <b>0.64</b>              | 0.39                    | <b>0.90</b>             | 0.25                    | 0.51                     | 0.71                   | 0.80                         |
| GOTA                | T                 | 0.61                   | 0.85                    | 0.42                    | 0.63                     | 0.39                    | <b>0.90</b>             | 0.25                    | 0.51                     | 0.71                   | 0.80                         |
| RandFR              | N/A               | 0.50                   | 0.68                    | 0.37                    | 0.52                     | 0.38                    | 0.71                    | 0.26                    | 0.30                     | 0.48                   | 0.56                         |
| RandIC              | N/A               | 0.50                   | 0.56                    | <b>0.46</b>             | 0.53                     | <b>0.50</b>             | 0.60                    | <b>0.43</b>             | 0.12                     | 0.23                   | 0.30                         |
| k-NN                | AN                | 0.52                   | 0.71                    | 0.39                    | 0.57                     | 0.40                    | 0.77                    | 0.27                    | 0.37                     | 0.48                   | 0.58                         |
| GOTA $\Phi_P^*$     | PM                | 0.60                   | 0.85                    | 0.42                    | 0.63                     | 0.40                    | 0.89                    | 0.26                    | 0.50                     | 0.70                   | 0.78                         |
| GOTA $\Phi_P$       | PM                | <b>0.62</b>            | <b>0.86</b>             | 0.42                    | <b>0.64</b>              | 0.40                    | <b>0.90</b>             | 0.26                    | 0.51                     | 0.72                   | 0.80                         |
| GOTA $\Phi_P$       | T+A               | 0.60                   | <b>0.86</b>             | 0.42                    | 0.62                     | 0.40                    | 0.89                    | 0.26                    | 0.50                     | 0.71                   | 0.79                         |
| GOTA $\Phi_P$       | T                 | 0.60                   | <b>0.86</b>             | 0.42                    | 0.62                     | 0.40                    | 0.89                    | 0.26                    | 0.50                     | 0.71                   | 0.79                         |
| GOTA $\Phi_T$       | PM                | 0.35                   | 0.43                    | 0.29                    | 0.45                     | 0.34                    | 0.55                    | 0.25                    | 0.14                     | 0.19                   | 0.24                         |
| GOTA $\Phi_T$       | T+A               | 0.32                   | 0.41                    | 0.28                    | 0.43                     | 0.34                    | 0.53                    | 0.25                    | 0.11                     | 0.16                   | 0.21                         |
| GOTA $\Phi_T$       | T                 | 0.31                   | 0.37                    | 0.27                    | 0.42                     | 0.32                    | 0.51                    | 0.23                    | 0.09                     | 0.12                   | 0.16                         |

For each metric, the best result is highlighted in bold.

<sup>a</sup> Method used for prediction. RandFR and RandIC are baseline predictors. k-NN is a baseline predictor that exploits uniquely authorship information. GOTA  $\Phi_P^*$  is a modified version of GOTA  $\Phi_P$  that ignores authorship information.

<sup>b</sup> Informations used in prediction: PM = title, abstract, references and publication year (PubMed); T+A = title and abstract; T = title; AN = author names; N/A = no information.

<sup>c</sup> Metrics definitions are in Section 2.3.

<sup>d</sup> Fraction of publications for which at least one gold-standard annotation has been correctly predicted.

### 3.2.2 Evaluation of the top-20 predicted GO terms

Tab. 62: Performance comparison over all GO (14681 publications)

| Method <sup>a</sup> | Info <sup>b</sup> | IT <sup>c</sup>        |                         |                         | CAFA <sup>c</sup>        | BC <sup>c</sup>         |                         |                         | TREC <sup>c</sup>        |                        | # <sub>20</sub> <sup>d</sup> |
|---------------------|-------------------|------------------------|-------------------------|-------------------------|--------------------------|-------------------------|-------------------------|-------------------------|--------------------------|------------------------|------------------------------|
|                     |                   | <i>iP</i> <sub>1</sub> | <i>iR</i> <sub>20</sub> | <i>iP</i> <sub>20</sub> | <i>hF</i> <sub>max</sub> | <i>hF</i> <sub>20</sub> | <i>hR</i> <sub>20</sub> | <i>hP</i> <sub>20</sub> | <i>MRR</i> <sub>20</sub> | <i>R</i> <sub>20</sub> |                              |
| GOTA                | PM                | <b>0.43</b>            | <b>0.73</b>             | <b>0.24</b>             | <b>0.43</b>              | <b>0.27</b>             | <b>0.80</b>             | <b>0.16</b>             | <b>0.41</b>              | <b>0.57</b>            | <b>0.77</b>                  |
| GOTA                | T+A               | 0.42                   | 0.72                    | <b>0.24</b>             | <b>0.43</b>              | <b>0.27</b>             | 0.79                    | <b>0.16</b>             | 0.40                     | 0.55                   | 0.76                         |
| GOTA                | T                 | 0.41                   | 0.72                    | <b>0.24</b>             | 0.42                     | <b>0.27</b>             | 0.78                    | <b>0.16</b>             | 0.40                     | 0.54                   | 0.75                         |
| RandFR              | N/A               | 0.20                   | 0.40                    | 0.14                    | 0.20                     | 0.15                    | 0.43                    | 0.09                    | 0.18                     | 0.19                   | 0.35                         |
| RandIC              | N/A               | 0.21                   | 0.31                    | 0.19                    | 0.18                     | 0.10                    | 0.38                    | 0.06                    | 0.03                     | 0.08                   | 0.15                         |
| k-NN                | AN                | 0.29                   | 0.57                    | 0.19                    | 0.33                     | 0.22                    | 0.63                    | 0.13                    | 0.26                     | 0.31                   | 0.50                         |
| GOTA $\Phi_P^*$     | PM                | 0.36                   | 0.71                    | 0.22                    | 0.40                     | 0.25                    | 0.77                    | 0.15                    | 0.37                     | 0.52                   | 0.73                         |
| GOTA $\Phi_P$       | PM                | 0.37                   | <b>0.73</b>             | 0.23                    | 0.41                     | <b>0.27</b>             | 0.78                    | <b>0.16</b>             | 0.39                     | 0.54                   | 0.75                         |
| GOTA $\Phi_P$       | T+A               | 0.36                   | 0.71                    | 0.23                    | 0.40                     | 0.25                    | 0.77                    | 0.15                    | 0.37                     | 0.52                   | 0.73                         |
| GOTA $\Phi_P$       | T                 | 0.36                   | 0.71                    | 0.23                    | 0.40                     | 0.25                    | 0.77                    | 0.15                    | 0.37                     | 0.52                   | 0.73                         |
| GOTA $\Phi_T$       | PM                | 0.28                   | 0.48                    | 0.20                    | 0.31                     | 0.21                    | 0.59                    | 0.13                    | 0.16                     | 0.22                   | 0.40                         |
| GOTA $\Phi_T$       | T+A               | 0.24                   | 0.45                    | 0.19                    | 0.27                     | 0.20                    | 0.56                    | 0.12                    | 0.11                     | 0.16                   | 0.31                         |
| GOTA $\Phi_T$       | T                 | 0.23                   | 0.42                    | 0.19                    | 0.26                     | 0.20                    | 0.54                    | 0.12                    | 0.09                     | 0.14                   | 0.27                         |

For each metric, the best result is highlighted in bold.

Tab. 63: Performance comparison over BP (11,008 publications)

| Method <sup>a</sup> | Info <sup>b</sup> | IT <sup>c</sup>        |                         |                         | CAFA <sup>c</sup>        | BC <sup>c</sup>         |                         |                         | TREC <sup>c</sup>        |                        | # <sub>20</sub> <sup>d</sup> |
|---------------------|-------------------|------------------------|-------------------------|-------------------------|--------------------------|-------------------------|-------------------------|-------------------------|--------------------------|------------------------|------------------------------|
|                     |                   | <i>iP</i> <sub>1</sub> | <i>iR</i> <sub>20</sub> | <i>iP</i> <sub>20</sub> | <i>hF</i> <sub>max</sub> | <i>hF</i> <sub>20</sub> | <i>hR</i> <sub>20</sub> | <i>hP</i> <sub>20</sub> | <i>MRR</i> <sub>20</sub> | <i>R</i> <sub>20</sub> |                              |
| GOTA                | PM                | <b>0.50</b>            | <b>0.78</b>             | <b>0.30</b>             | <b>0.50</b>              | <b>0.25</b>             | <b>0.84</b>             | <b>0.15</b>             | <b>0.39</b>              | <b>0.58</b>            | <b>0.72</b>                  |
| GOTA                | T+A               | 0.49                   | <b>0.78</b>             | <b>0.30</b>             | 0.49                     | <b>0.25</b>             | 0.83                    | <b>0.15</b>             | 0.37                     | 0.56                   | 0.71                         |
| GOTA                | T                 | 0.49                   | 0.77                    | <b>0.30</b>             | 0.49                     | 0.24                    | 0.83                    | 0.14                    | 0.37                     | 0.56                   | 0.70                         |
| RandFR              | N/A               | 0.21                   | 0.43                    | 0.17                    | 0.17                     | 0.15                    | 0.48                    | 0.09                    | 0.04                     | 0.10                   | 0.15                         |
| RandIC              | N/A               | 0.29                   | 0.36                    | 0.25                    | 0.26                     | 0.14                    | 0.47                    | 0.08                    | 0.01                     | 0.02                   | 0.03                         |
| k-NN                | AN                | 0.35                   | 0.61                    | 0.23                    | 0.37                     | 0.22                    | 0.67                    | 0.13                    | 0.19                     | 0.27                   | 0.37                         |
| GOTA $\Phi_P^*$     | PM                | 0.47                   | 0.77                    | 0.28                    | 0.47                     | 0.24                    | 0.82                    | 0.14                    | 0.34                     | 0.52                   | 0.67                         |
| GOTA $\Phi_P$       | PM                | 0.48                   | <b>0.78</b>             | 0.28                    | 0.48                     | 0.24                    | 0.83                    | 0.14                    | 0.36                     | 0.55                   | 0.70                         |
| GOTA $\Phi_P$       | T+A               | 0.47                   | 0.77                    | 0.28                    | 0.47                     | 0.24                    | 0.82                    | 0.14                    | 0.34                     | 0.53                   | 0.67                         |
| GOTA $\Phi_P$       | T                 | 0.47                   | 0.77                    | 0.28                    | 0.47                     | 0.24                    | 0.82                    | 0.14                    | 0.34                     | 0.53                   | 0.67                         |
| GOTA $\Phi_T$       | PM                | 0.33                   | 0.58                    | 0.25                    | 0.37                     | 0.23                    | 0.66                    | 0.14                    | 0.16                     | 0.27                   | 0.38                         |
| GOTA $\Phi_T$       | T+A               | 0.29                   | 0.54                    | 0.23                    | 0.34                     | 0.23                    | 0.63                    | 0.14                    | 0.11                     | 0.20                   | 0.30                         |
| GOTA $\Phi_T$       | T                 | 0.27                   | 0.51                    | 0.23                    | 0.32                     | 0.21                    | 0.62                    | 0.13                    | 0.09                     | 0.17                   | 0.26                         |

For each metric, the best result is highlighted in bold.

Tab. 64: Performance comparison over MF (6,910 publications)

| Method <sup>a</sup> | Info <sup>b</sup> | IT <sup>c</sup>        |                         |                         | CAFA <sup>c</sup>        | BC <sup>c</sup>         |                         |                         | TREC <sup>c</sup>        |                        | # <sub>20</sub> <sup>d</sup> |
|---------------------|-------------------|------------------------|-------------------------|-------------------------|--------------------------|-------------------------|-------------------------|-------------------------|--------------------------|------------------------|------------------------------|
|                     |                   | <i>iP</i> <sub>1</sub> | <i>iR</i> <sub>20</sub> | <i>iP</i> <sub>20</sub> | <i>hF</i> <sub>max</sub> | <i>hF</i> <sub>20</sub> | <i>hR</i> <sub>20</sub> | <i>hP</i> <sub>20</sub> | <i>MRR</i> <sub>20</sub> | <i>R</i> <sub>20</sub> |                              |
| GOTA                | PM                | <b>0.60</b>            | <b>0.78</b>             | <b>0.31</b>             | <b>0.65</b>              | 0.21                    | <b>0.92</b>             | 0.12                    | <b>0.54</b>              | <b>0.77</b>            | <b>0.84</b>                  |
| GOTA                | T+A               | 0.57                   | 0.77                    | 0.30                    | 0.64                     | 0.21                    | <b>0.92</b>             | 0.12                    | 0.53                     | 0.76                   | 0.83                         |
| GOTA                | T                 | 0.57                   | 0.77                    | 0.30                    | 0.64                     | 0.21                    | <b>0.92</b>             | 0.12                    | 0.53                     | 0.76                   | 0.83                         |
| RandFR              | N/A               | 0.43                   | 0.53                    | 0.26                    | 0.49                     | 0.13                    | 0.64                    | 0.07                    | 0.31                     | 0.38                   | 0.45                         |
| RandIC              | N/A               | 0.43                   | 0.50                    | 0.30                    | 0.49                     | 0.24                    | 0.56                    | 0.15                    | 0.29                     | 0.29                   | 0.36                         |
| k-NN                | AN                | 0.46                   | 0.60                    | 0.27                    | 0.54                     | 0.25                    | 0.73                    | 0.15                    | 0.38                     | 0.46                   | 0.54                         |
| GOTA $\Phi_P^*$     | PM                | 0.54                   | 0.77                    | 0.29                    | 0.64                     | 0.20                    | 0.91                    | 0.11                    | 0.50                     | 0.73                   | 0.80                         |
| GOTA $\Phi_P$       | PM                | 0.55                   | <b>0.78</b>             | 0.30                    | <b>0.65</b>              | 0.20                    | <b>0.92</b>             | 0.11                    | 0.52                     | 0.76                   | 0.83                         |
| GOTA $\Phi_P$       | T+A               | 0.53                   | <b>0.78</b>             | 0.29                    | 0.62                     | 0.20                    | 0.91                    | 0.11                    | 0.49                     | 0.75                   | 0.82                         |
| GOTA $\Phi_P$       | T                 | 0.53                   | <b>0.78</b>             | 0.29                    | 0.63                     | 0.20                    | 0.91                    | 0.11                    | 0.49                     | 0.75                   | 0.82                         |
| GOTA $\Phi_T$       | PM                | 0.36                   | 0.52                    | 0.28                    | 0.48                     | <b>0.27</b>             | 0.69                    | <b>0.17</b>             | 0.17                     | 0.28                   | 0.34                         |
| GOTA $\Phi_T$       | T+A               | 0.32                   | 0.48                    | 0.26                    | 0.44                     | <b>0.27</b>             | 0.64                    | <b>0.17</b>             | 0.12                     | 0.22                   | 0.27                         |
| GOTA $\Phi_T$       | T                 | 0.30                   | 0.46                    | 0.26                    | 0.43                     | 0.26                    | 0.63                    | 0.16                    | 0.11                     | 0.20                   | 0.25                         |

For each metric, the best result is highlighted in bold.

Tab. 65: Performance comparison over CC (5,114 publications)

| Method <sup>a</sup> | Info <sup>b</sup> | IT <sup>c</sup>        |                         |                         | CAFA <sup>c</sup>        | BC <sup>c</sup>         |                         |                         | TREC <sup>c</sup>        |                        | # <sub>20</sub> <sup>d</sup> |
|---------------------|-------------------|------------------------|-------------------------|-------------------------|--------------------------|-------------------------|-------------------------|-------------------------|--------------------------|------------------------|------------------------------|
|                     |                   | <i>iP</i> <sub>1</sub> | <i>iR</i> <sub>20</sub> | <i>iP</i> <sub>20</sub> | <i>hF</i> <sub>max</sub> | <i>hF</i> <sub>20</sub> | <i>hR</i> <sub>20</sub> | <i>hP</i> <sub>20</sub> | <i>MRR</i> <sub>20</sub> | <i>R</i> <sub>20</sub> |                              |
| GOTA                | PM                | <b>0.62</b>            | <b>0.90</b>             | 0.38                    | <b>0.64</b>              | 0.27                    | <b>0.94</b>             | 0.16                    | <b>0.52</b>              | <b>0.81</b>            | <b>0.88</b>                  |
| GOTA                | T+A               | 0.61                   | 0.89                    | 0.37                    | <b>0.64</b>              | 0.27                    | <b>0.94</b>             | 0.16                    | <b>0.52</b>              | 0.80                   | 0.87                         |
| GOTA                | T                 | 0.61                   | 0.89                    | 0.37                    | 0.63                     | 0.27                    | <b>0.94</b>             | 0.16                    | 0.51                     | 0.79                   | 0.86                         |
| RandFR              | N/A               | 0.50                   | 0.77                    | 0.34                    | 0.52                     | 0.25                    | 0.80                    | 0.15                    | 0.31                     | 0.56                   | 0.65                         |
| RandIC              | N/A               | 0.50                   | 0.66                    | <b>0.41</b>             | 0.53                     | 0.32                    | 0.71                    | 0.21                    | 0.13                     | 0.38                   | 0.46                         |
| k-NN                | AN                | 0.52                   | 0.75                    | 0.37                    | 0.57                     | <b>0.35</b>             | 0.80                    | 0.22                    | 0.37                     | 0.53                   | 0.62                         |
| GOTA $\Phi_P^*$     | PM                | 0.60                   | 0.89                    | 0.37                    | 0.63                     | 0.27                    | <b>0.94</b>             | 0.16                    | 0.50                     | 0.78                   | 0.85                         |
| GOTA $\Phi_P$       | PM                | <b>0.62</b>            | <b>0.90</b>             | 0.37                    | <b>0.64</b>              | 0.27                    | <b>0.94</b>             | 0.16                    | <b>0.52</b>              | 0.80                   | 0.87                         |
| GOTA $\Phi_P$       | T+A               | 0.60                   | <b>0.90</b>             | 0.37                    | 0.62                     | 0.27                    | <b>0.94</b>             | 0.16                    | 0.50                     | 0.79                   | 0.86                         |
| GOTA $\Phi_P$       | T                 | 0.60                   | <b>0.90</b>             | 0.37                    | 0.62                     | 0.27                    | <b>0.94</b>             | 0.16                    | 0.50                     | 0.79                   | 0.86                         |
| GOTA $\Phi_T$       | PM                | 0.35                   | 0.43                    | 0.29                    | 0.45                     | 0.33                    | 0.56                    | <b>0.23</b>             | 0.15                     | 0.20                   | 0.25                         |
| GOTA $\Phi_T$       | T+A               | 0.32                   | 0.42                    | 0.27                    | 0.43                     | 0.31                    | 0.55                    | 0.22                    | 0.12                     | 0.18                   | 0.23                         |
| GOTA $\Phi_T$       | T                 | 0.31                   | 0.38                    | 0.26                    | 0.42                     | 0.30                    | 0.52                    | 0.21                    | 0.09                     | 0.14                   | 0.18                         |

For each metric, the best result is highlighted in bold.

<sup>a</sup> Method used for prediction. RandFR and RandIC are baseline predictors. k-NN is a baseline predictor that exploits uniquely authorship information. GOTA  $\Phi_P^*$  is a modified version of GOTA  $\Phi_P$  that ignores authorship information.

<sup>b</sup> Informations used in prediction: PM = title, abstract, references and publication year (PubMed); T+A = title and abstract; T = title; AN = author names; N/A = no information.

<sup>c</sup> Metrics definitions are in Section 2.3.

<sup>d</sup> Fraction of publications for which at least one gold-standard annotation has been correctly predicted.

## 4 Confidence score

We considered the problem of assigning a confidence threshold to the predicted annotations. The aim of such filter is to provide to the user a confidence level, mainly for those queries that have a very low biological content. Such confidence scores are shown for a prediction when GOTA's Web-based application<sup>1</sup> is queried with some text or PubMed identifier.

We define three confidence levels: *low*, *medium*, *high*. We tuned a threshold value for each level of confidence by considering GOTA's score of the very top predicted term. In detail, we retrieved from Scopus<sup>2</sup> a set of 600 abstracts from six scientific fields not directly related to biology and medicine (namely: physics, chemistry, mathematics, computer science, economics and arts). We downloaded the top-100 cited publications in each discipline. We queried the 600 abstracts with GOTA and retrieved the score value of the very top predicted term for each publication. We then used such scores to setup the score thresholds for the *low*, *medium* and *high* confidence levels:

- we selected as *high* confidence threshold the score value that allows GOTA to *filter-out* 95% of the 600 query abstracts (i.e. for only 5% of the 600 test-abstracts the score assigned to the top predicted term is strictly higher than the *high* confidence threshold);
- we selected as medium confidence threshold the score value that allows GOTA to *filter-out* 90% of the 600 query abstracts.
- if for a query publication the top predicted term has a score strictly lower than the *medium* confidence threshold, then to such prediction is assigned a *low* confidence level.

Although this approach can be made more robust, it still offers some indications about the reliability of GOTA's classifications. In particular, we can roughly say that there is 5% probability that classifications of non biologically-related publications are reported as *highly confident*, and 90% probability that are reported as *low-confidence classifications*. These score thresholds seem to work quite well with the 15,000 biologically-related publications in our test set: 96% of the classifications are reported as high confident and 2% as low confident. Consistently, the average quality of the 2% low-confident classifications is also quite poor in comparison to GOTA's average performance.

---

<sup>1</sup> <http://gota.apice.unibo.it>

<sup>2</sup> <http://www.scopus.com>
